# Supplementary material for: Evaluating the implementation of a dynamic digital application to enable community-based decentralisation of rheumatic heart disease case management in Uganda: protocol for a hybrid type III effectiveness-implementation study
Source: PubMed Central journal article supplement — BMJ Open. 2023 Oct 28;13(10):e071540. doi: 10.1136/bmjopen-2022-071540 (PMC10619093; doi:10.1136/bmjopen-2022-071540), 2023-10-28
Supplement: bmjopen-2022-071540.draft_revisions.pdf [file bmjopen-2022-071540.draft_revisions.pdf]

# BMJ Open

BMJ Open is committed to open peer review. As part of this commitment we make the peer review history of every article we publish publicly available.

When an article is published we post the peer reviewers' comments and the authors' responses online. We also post the versions of the paper that were used during peer review. These are the versions that the peer review comments apply to.

The versions of the paper that follow are the versions that were submitted during the peer review process. They are not the versions of record or the final published versions. They should not be cited or distributed as the published version of this manuscript.

BMJ Open is an open access journal and the full, final, typeset and author-corrected version of record of the manuscript is available on our site with no access controls, subscription charges or pay-per-view fees (<http://bmjopen.bmj.com>).

If you have any questions on BMJ Open's open peer review process please email [info.bmjopen@bmj.com](mailto:info.bmjopen@bmj.com)

# BMJ Open

## Implementation of a dynamic mobile application to enable community-based decentralization of rheumatic heart disease case management in Uganda: a study protocol

|                               |                                                                                                                                                                                                                                                                                                                                                                                                                                                                                                                                                                                                                                                                                                                                                                                                                                                                                                                                                                                                                                                                                                                                                                                                                                                                                                                                                                                                                                                                                                                                                                                                                                                                                                                                                                                                                                                                                                                                                                                                                                                                                                                                         |
|-------------------------------|-----------------------------------------------------------------------------------------------------------------------------------------------------------------------------------------------------------------------------------------------------------------------------------------------------------------------------------------------------------------------------------------------------------------------------------------------------------------------------------------------------------------------------------------------------------------------------------------------------------------------------------------------------------------------------------------------------------------------------------------------------------------------------------------------------------------------------------------------------------------------------------------------------------------------------------------------------------------------------------------------------------------------------------------------------------------------------------------------------------------------------------------------------------------------------------------------------------------------------------------------------------------------------------------------------------------------------------------------------------------------------------------------------------------------------------------------------------------------------------------------------------------------------------------------------------------------------------------------------------------------------------------------------------------------------------------------------------------------------------------------------------------------------------------------------------------------------------------------------------------------------------------------------------------------------------------------------------------------------------------------------------------------------------------------------------------------------------------------------------------------------------------|
| Journal:                      | <i>BMJ Open</i>                                                                                                                                                                                                                                                                                                                                                                                                                                                                                                                                                                                                                                                                                                                                                                                                                                                                                                                                                                                                                                                                                                                                                                                                                                                                                                                                                                                                                                                                                                                                                                                                                                                                                                                                                                                                                                                                                                                                                                                                                                                                                                                         |
| Manuscript ID                 | bmjopen-2022-071540                                                                                                                                                                                                                                                                                                                                                                                                                                                                                                                                                                                                                                                                                                                                                                                                                                                                                                                                                                                                                                                                                                                                                                                                                                                                                                                                                                                                                                                                                                                                                                                                                                                                                                                                                                                                                                                                                                                                                                                                                                                                                                                     |
| Article Type:                 | Protocol                                                                                                                                                                                                                                                                                                                                                                                                                                                                                                                                                                                                                                                                                                                                                                                                                                                                                                                                                                                                                                                                                                                                                                                                                                                                                                                                                                                                                                                                                                                                                                                                                                                                                                                                                                                                                                                                                                                                                                                                                                                                                                                                |
| Date Submitted by the Author: | 31-Dec-2022                                                                                                                                                                                                                                                                                                                                                                                                                                                                                                                                                                                                                                                                                                                                                                                                                                                                                                                                                                                                                                                                                                                                                                                                                                                                                                                                                                                                                                                                                                                                                                                                                                                                                                                                                                                                                                                                                                                                                                                                                                                                                                                             |
| Complete List of Authors:     | <p>Minja, Neema W.; University of Washington, Department of Global Health; Kilimanjaro Clinical Research Institute (KCRI)<br/> Pulle, Jafesi; Uganda Heart Institute Ltd, Research<br/> Rwebemba, Joselyn; Uganda Heart Institute Ltd, Department of Adult Cardiology<br/> de Loizaga, Sarah R.; Cincinnati Children's Hospital Medical Center, The Heart Institute<br/> Fall, Ndate; Cincinnati Children's Hospital Medical Center, The Heart Institute<br/> Ollberding, Nicholas; Cincinnati Children's Hospital Medical Center, Division of Biostatistics and Epidemiology; University of Cincinnati College of Medicine, Department of Pediatrics,<br/> Abrams, Jessica; University of Cape Town, Department of Pediatrics and Child Health; Reach<br/> Atala, Jenifer; Uganda Heart Institute Ltd<br/> Kamarembo, Jenipher; Uganda Heart Institute Ltd<br/> Oyella, Linda; Uganda Heart Institute Ltd<br/> Odong, Francis; Uganda Heart Institute Ltd<br/> Nalubwama, Haddy; Makerere University<br/> Nakagaayi, Doreen; Uganda Heart Institute Ltd, Department of Adult Cardiology; Cincinnati Children's Hospital Medical Center, The Heart Institute<br/> Sarnacki, Rachel; Children's National Medical Center, Cardiology<br/> Su, Yanfang; University of Washington, Department of Global Health<br/> Dexheimer, Judith W.; Cincinnati Children's Hospital Medical Center, Department of Biomedical Informatics; University of Cincinnati College of Medicine<br/> Sable, Craig; Children's National Hospital, Cardiology<br/> Longenecker, Chris T.; University of Washington, Department of Global Health &amp; Division of Cardiology<br/> Danforth, Kristen; University of Washington, Department of Global Health<br/> Okello, Emmy; Uganda Heart Institute Ltd, Department of Adult Cardiology; Makerere University College of Health Sciences, Department of Medicine, College of Health Science,<br/> Beaton, Andrea; Cincinnati Children's Hospital Medical Center, Cardiology<br/> Watkins, DA; University of Washington, Department of Global Health; University of Washington, Department of general medicine</p> |

1  
2  
3  
4  
5  
6  
7  
8  
9  
10  
11  
12  
13  
14  
15  
16  
17  
18  
19  
20  
21  
22  
23  
24  
25  
26  
27  
28  
29  
30  
31  
32  
33  
34  
35  
36  
37  
38  
39  
40  
41  
42  
43  
44  
45  
46  
47  
48  
49  
50  
51  
52  
53  
54  
55  
56  
57  
58  
59  
60

|           |                                                                                                                                                          |
|-----------|----------------------------------------------------------------------------------------------------------------------------------------------------------|
| Keywords: | Valvular heart disease < CARDIOLOGY, Adult cardiology < CARDIOLOGY, Health informatics < BIOTECHNOLOGY & BIOINFORMATICS, REGISTRIES, PREVENTIVE MEDICINE |
|           |                                                                                                                                                          |

SCHOLARONE™  
Manuscripts

## Implementation of a dynamic mobile application to enable community-based decentralization of rheumatic heart disease case management in Uganda: a study protocol

Neema W. Minja<sup>1,2,3\*</sup>, Jafesi Pulle<sup>2</sup>, Joselyn Rwebembera<sup>4</sup>, Sarah R. de Loizaga<sup>5</sup>, Ndate Fall<sup>5</sup>, Nicholas J. Ollberding<sup>6,7</sup>, Jessica Abrams<sup>8,9</sup>, Jenifer Atala<sup>2</sup>, Jenipher Kamarembo<sup>2</sup>, Linda Mary<sup>2</sup>, Francis Odong<sup>2</sup>, Haddy Nalubwama<sup>10</sup>, Doreen Nakagaayi<sup>4,5</sup>, Rachel Sarnacki<sup>11</sup>, Yanfang Su<sup>1</sup>, Judith W. Dexheimer<sup>13,14,15</sup>, Craig Sable<sup>16</sup>, Chris T. Longenecker<sup>17</sup>, Kristen Danforth<sup>1</sup>, Emmy Okello<sup>4,17</sup>, Andrea Beaton<sup>5</sup>, David Watkins<sup>1,18</sup>

<sup>1</sup>Department of Global Health, University of Washington, Seattle, WA 98195, USA, <sup>2</sup>Uganda Heart institute, Mulago Hospital, Kampala 37392, Uganda, <sup>3</sup>Kilimanjaro Clinical Research Institute (KCRI), Moshi, Tanzania, <sup>4</sup>Department of Cardiology, Uganda Heart institute, Mulago Hospital, Kampala 37392, Uganda, <sup>5</sup>The Heart Institute, Cincinnati Children's Hospital Medical Center, Cincinnati, USA, <sup>6</sup>Division of Biostatistics and Epidemiology, Cincinnati Children's Hospital Medical Centre, Cincinnati, Ohio, USA, <sup>7</sup>Department of Pediatrics, University of Cincinnati College of Medicine, Cincinnati, Ohio, USA, <sup>8</sup>Division of Pediatric Cardiology, Department of Pediatrics and Child Health, University of Cape Town, Cape Town, South Africa; <sup>9</sup>Reach, Cape Town, South Africa, <sup>10</sup>Makerere University, Kampala, Uganda, <sup>11</sup>Children's National Medical Center, Washington DC, USA, <sup>13</sup>Department of Biomedical Informatics, Cincinnati Children's Hospital Medical Center, Cincinnati, USA, <sup>14</sup>University of Cincinnati School of Medicine, Cincinnati, USA, <sup>15</sup>Division of Emergency Medicine, Cincinnati Children's Hospital Medical Center, Cincinnati, USA, <sup>16</sup>Children's National Hospital, Washington D.C., USA, <sup>17</sup>Department of Global Health & Division of Cardiology, University of Washington, Seattle, USA, <sup>17</sup>Department of Medicine, College of Health Science, Makerere University, Uganda, <sup>18</sup>Department of general medicine, University of Washington, Seattle, WA 98195, USA

\*Corresponding author: E-mail: [nminja@uw.edu](mailto:nminja@uw.edu)

### ABSTRACT:

**Introduction:** Rheumatic heart disease (RHD) affects more than 39 million people worldwide, most of whom live in low- and middle- income countries. Secondary antibiotic prophylaxis (SAP), given every 3 to 4 weeks as intramuscular benzathine penicillin G (BPG), can improve outcomes, but only if more than 80% of doses are received. Poor adherence is strongly correlated with the distance patients need to travel to receive prophylaxis. Decentralizing RHD care has the potential to bridge the aforementioned gaps and at least maintain or potentially increase, the uptake of secondary prophylaxis for RHD. A package of implementation strategies was developed with the aim of reducing barriers to optimum SAP uptake.

**Methods and analysis:** A hybrid implementation-effectiveness study type III was designed to evaluate the effectiveness of a package of implementation strategies that includes a mobile, cloud-based application to support decentralized RHD care, integrated into the public healthcare system in Uganda. Our overarching hypothesis is that secondary prophylaxis adherence can be maintained or improved via a decentralization strategy, compared to the centralized delivery strategy, by increasing retention in care. To evaluate this, patients currently cared for at the centralized RHD registry hospital sites will be consented for decentralized care at a health center located no more than 20 km from their home. The primary outcome will be adherence to secondary prophylaxis and detailed implementation measures will be collected to understand barriers and facilitators to decentralization, active community case management tool (ACT) application adoption, and ultimately its use and scale-up in the public healthcare system.

**Ethics and dissemination:** This study was approved by the Institutional Review Board (IRB) at Cincinnati Children's Hospital Medical Center, and Makerere University School of Medicine Research Ethics Committee (Mak-SOMREC). At completion, study findings will be published in peer-reviewed journals and communicated to the public and key stakeholders.

**Keywords:** Rheumatic Heart disease, BPG, Decentralization, Registry, Technology, Implementation science, Primary health center

### Strengths and limitations of this study

- In this study, a potentially effective, scalable, sustainable approach to decentralization of RHD care for diagnosed patients is presented.
- The use of conventional study designs for establishing causality such as a cluster randomized control trial was limited by the number of people currently in RHD care in Uganda. However, the protocol outlines a practical, robust and iterative methodology which if successful, will inform future study designs to test the decentralization of interventions for chronic disease management in similar settings.
- The study demonstrates the feasibility of integrating an electronic registry for RHD patient management at the primary health care (PHC) level in a low-resource setting.

### INTRODUCTION

Rheumatic Heart Disease (RHD) remains the most commonly acquired heart disease in people under 25 years of age (1). The median age at death, 28 years in Sub-Saharan Africa (2), translates into a large toll on the economically-productive age groups, resulting in rippled economic effects for already impoverished families (3). Furthermore, RHD is a disease associated with marked disparities, disproportionately affecting socioeconomically disadvantaged populations including children, women, poverty-stricken and marginalized minority ethnic groups (4–8). It is estimated that there are 39 million people with RHD globally, surpassing the number of people currently living with HIV/AIDS (4,9). Unlike HIV, which has seen sustained efforts towards control, RHD was not a priority on the international health development agenda for many years. Most low-income countries have no RHD programs in place, resulting in a gross underestimation of the prevalent cases and poor RHD knowledge by the healthcare workforce.

The first global resolution on rheumatic fever and RHD was adopted at the 71<sup>st</sup> World Health Assembly in 2018. Outlined among the broad clauses of this resolution is for countries to invest in community and primary healthcare workers as well as access to medicines for the prevention and control of RHD (10,11). Secondary antibiotic prophylaxis (SAP), in the form of monthly intramuscular Benzathine penicillin G (BPG), has been shown to be effective in preventing recurrent streptococcal infections - 'strep throat', acute rheumatic fever (ARF), and progression of RHD (12–14). However, these benefits are contingent on achieving an optimum adherence, at least  $\geq 80\%$  coverage of prescribed injections over many years of treatment (14,15). However, adherence is often suboptimal, leaving patients vulnerable to recurrent ARF and disease progression, a significant risk factor for death within eight months of diagnosis (16). Several factors have been shown to impact optimal BPG adherence – including drug supply shortages, distances travelled to the health facilities, and associated costs of attending hospitals for monthly injections (17–19).

Previous research in Uganda identified the distance people currently have to travel to receive routine monthly SAP is a major barrier, and a strong predictor of retention (20,21). This is due in part to the absent district-level RHD programs in Uganda, where primary health care (PHC) nurses do not have practical skills and tools to efficiently manage BPG delivery for RHD patients, despite the fact that this is well within their scope of practice. Moreover, registries have been identified as an important part of RHD control measures (22–24) and set forth as a priority by RHD experts (25).

1  
2  
3 However, in practice, centralized registries have often taken the form of static data collection (21),  
4 and not geared to scale to the community at large. While RHD programs are not yet operational at  
5 the district level in Uganda, we have an opportunity to improve access and uptake of BPG  
6 prophylaxis for the small fraction (1-2% of estimated total cases nationally) of people who have been  
7 identified and are active in the national RHD registry (20). Decentralization of care to primary health  
8 facilities has been employed for other diseases, the most widespread in the region being  
9 decentralization of HIV treatment to PHC nurses, allowing for major scale-up and availability of HIV  
10 services to those in-need (26).  
11  
12

13 Demonstrating that a modern approach to RHD care is effective and implementable is important  
14 because these tools will be critical to scaling RHD services to larger populations, as the capacity for  
15 the current centralized approach will be insufficient to serve the approximately 200 - 400 thousand  
16 persons estimated to be living with RHD in Uganda. Thus, there is a need to bring RHD care into the  
17 digital age, where technology-enhanced dynamic tools can be employed to improve RHD care  
18 delivery. The ADD-RHD (Active Case Detection and Decentralized Dynamic Registry to Improve the  
19 Uptake of Rheumatic Heart Disease Secondary Prevention) study was designed to address the  
20 above-mentioned challenges, including long distances to regional hospitals and the lack of a dynamic  
21 record system. The study is called "ADD-RHD" in part because the study "adds" RHD care to the list  
22 of competencies of PHC nurses in the study sites. As a major component of this study, the Active  
23 community case management tool (ACT) that was recently developed and piloted will be introduced  
24 in this setting, intended to support clinicians with technology-enhanced support tools (27).  
25  
26  
27

### 28 **Aims and hypothesis**

29  
30 This study aims to evaluate the effectiveness of a package of implementation strategies that include  
31 readiness assessment, change of service sites, change of records-keeping, health care worker  
32 training, purposefully re-examination of the implementation, identification of champions and  
33 physical supply of medicines for improving SAP delivery for RHD care. We hypothesize that this ADD-  
34 RHD package is equivalent or better than the existing model of care for SAP adherence.  
35  
36

### 37 **METHODS AND ANALYSIS**

#### 38 **Study design**

39 This is a hybrid type III effectiveness-implementation study, that will be integrated into rural and  
40 semi-urban primary health centers. This design primarily focuses on the effectiveness of a package  
41 of implementation strategies whilst collecting secondary data on clinical outcomes (28).  
42 Decentralization of SAP delivery is postulated to at least preserve the level of adherence, whilst  
43 building capacity to scale up service delivery. The primary implementation endpoints will look at the  
44 post-implementation healthcare utilization outcomes among registrants, with a particular focus on  
45 SAP adherence (defined as proportion of days covered), which is strongly associated with the clinical  
46 outcomes of recurrence of ARF and progression of disease (14). The study will determine whether  
47 adherence to SAP is non-inferior post-implementation. Further, we will evaluate the acceptability,  
48 penetration, adoption, and cost of the implementation.  
49  
50  
51

52 For secondary clinical outcomes, we will explore the relationship between program and adverse  
53 cardiovascular events (recurrent ARF, new or worsening heart failure, atrial fibrillation) and  
54 mortality compared to the baseline period. Because of the relatively small number of identified  
55 people with RHD in Uganda, and the centralized nature of secondary prophylaxis delivery currently  
56 at a small number of referral hospitals, the use of conventional implementation designs such as a  
57 cluster randomized control trial or interrupted series design was not possible. Instead, we developed  
58  
59  
60

1  
2  
3 a non-randomized experiment using pre/post methods to demonstrate the impact of a package of  
4 strategies on implementation outcomes as well as intermediate clinical outcomes.  
5

## 6 **Study setting**

### 7 *Current RHD care provision – National registry at central and referral regional hospitals*

8  
9  
10  
11 Presently, a national RHD registry in Uganda is run centrally by research staff at the Uganda Heart  
12 Institute. Initially established in 2010, the registry subsequent expanded to include a satellite center  
13 in Kampala (Lebow) - and regional registry sites within 3 districts across the country (Mbarara, Gulu  
14 and Lira). The current RHD registry-based care in Uganda was initiated to capture people presenting  
15 with RHD to tertiary care and has served to establish numbers of those affected together with  
16 informing patient status. Dedicated research staff provide, coordinate and monitor routine BPG  
17 prophylaxis and RHD-related patient care in the country. The RHD registry is hosted electronically on  
18 REDCap, and involves both direct data entry and transfer of paper records into REDCap (29,30).  
19 However, the majority of records are paper-based and limited to the centers, which has proven to  
20 be outdated and ineffective (Table 1).  
21  
22

### 23 *The new approach – ADD-RHD*

24  
25 Existing RHD registrants based in Lira and Gulu districts will have their monthly SAP visits  
26 decentralized from the current research-nurse led regional hospitals to outpatient settings of  
27 selected PHCs staffed by ministry of health nurses (Table 1). In this study, decentralization is defined  
28 as the physical change of service delivery of SAP for RHD registry patients from current regional  
29 hospitals to district level PHC facilities. As part of the ADD-RHD package, the ACT application will be  
30 introduced.  
31  
32

## 33 **The Intervention**

34 Our evidenced-based intervention, secondary antibiotic prophylaxis, has been previously proven to  
35 be effective in reducing the recurrence of strep throat and acute rheumatic fever, the cascade of  
36 events that can progress to RHD (14,15,31). In addition to reducing the progression of RHD, there is  
37 evidence that SAP can also induce the regression of clinical RHD (32). Unless contraindicated, BPG is  
38 the gold standard and most widely used for RHD secondary prevention (14).  
39  
40

41 In preparation for the study, facility visits, engagement of local and district health officers and  
42 consideration of the existing registry were done in order to inform important aspects of the  
43 implementation strategy (Figure 1).  
44

### 45 **RHD registry cleaning and collection of baseline data prior to decentralization**

46 Prior to the study, existing RHD registrants were mapped by residence, and consequently, four HC  
47 III/IVs were chosen in each district based on diversity of location (city and rural parts of the districts)  
48 and RHD registrant geographical density (Figure 2). This was done in coordination with the local  
49 government, involving the District Health Administrator.  
50  
51

52 Initial collection of 12 – 18 months of intensive baseline data of existing RHD registry patients will be  
53 done for the two registry sites. Where necessary, patients will be contacted by phone for  
54 confirmation and completeness of information in order to determine baseline BPG adherence and  
55 retention data prior to decentralization. This data will be collected on a quarterly basis for important  
56 primary and secondary metrics defined.  
57  
58  
59  
60



1  
2  
3 Decentralization will be a phased process starting with two of the four clinics in Lira district, followed  
4 by the remaining two, with an approximate four-week gap in-between (Figure 1). Thereafter, this  
5 will be replicated in Gulu after a period of three months to allow incorporation of planned formative  
6 feedback from decentralization in the Lira district.  
7

8  
9 In this study, a package of implementation strategies (Table 2) will be employed to support a  
10 decentralized SAP delivery strategy to HC III/IV. This will be centered around the introduction of the  
11 ACT application further elaborated below.  
12

### 13 **ACT application**

14

15 The ACT application is a digital tool-kit designed to build on REDCap, the current research database.  
16 The application incorporates several important features for RHD control including; 1) Availability of a  
17 simplified, interactive record of patients' administered BPG injections with automatic adherence  
18 calculations and relevant patient details, investigations and management; 2) A 'manage my patient'  
19 feature that allows clinicians to track patient status by due or missed visits that integrates with a  
20 clinician-facing reminder function, and 3) Monitoring of medicinal and supply stocks at facility and  
21 central levels. ACT is a small-scale medical record application built with the overarching goal of its  
22 integration for RHD care nationally and internationally, with potential to be replicated for use in  
23 other chronic disease management. Table 1 summarizes the current and new approach with regards  
24 to ACT as a novel electronic tool. Initial on-going site support visits have been planned at pre-  
25 determined intervals (frequently at first and then more spaced out) and will serve to provide  
26 refresher training on RHD and ACT. Data will be collected around these and incorporated into the  
27 implementation evaluation.  
28  
29  
30

### 31 **Provider education**

32

33 Training of health workers from health centers will be central to this project. Whilst advocacy and  
34 awareness of RHD has been increasing overtime due to established research efforts, a large gap  
35 remains in provider RHD competency. Recent research found that less than 25% of facilities across  
36 several Ugandan districts had received any RHD training in the past two years and only 11% and 8%  
37 HC III and IVs had any RHD guidelines (34). Further, limited RHD knowledge was a prominent theme  
38 from published provider health care interviews, who expressed a strong desire for training (34).  
39  
40

41 Currently, service provision of BPG for RHD in HC III/IV is not done systematically. This informed an  
42 initial pilot training of representatives from each of the selected HCIII/IV facilities for  
43 decentralization in Lira. The pilot identified deficiencies in specific areas that was instrumental in  
44 tailoring educational materials developed for pre-decentralization training. We found variable but  
45 low RHD knowledge and experience among the HCWs. BPG is known to be a difficult injection to  
46 administer due to its nature to crystallize and presents challenges for unexperienced workers. A  
47 substantial portion of the planned training (and refresher sessions planned periodically thereafter),  
48 will focus on the practical aspects of BPG administration, as well as recognition and triage of  
49 potential BPG allergic reactions and anaphylaxis. The second set of training materials will consist of  
50 introduction to the ACT application. Furthermore, we developed a standard operating procedure  
51 (SOP), which will serve as the guideline for all decentralization procedures in health facilities in both  
52 districts.  
53  
54

55 'Champions', one of the implementation strategies, will be identified by the RHD research nurses  
56 based at the regional hospitals. The relationship between them and the staff at the health centers  
57 has been fostered overtime, giving them an advantage to identify motivated staff. In addition to this,  
58 the pilot training discussed above also contributed to the inclusion of medical records  
59  
60



representatives, who were not initially planned for. It was realized they are more technologically-competent and could provide IT support at the centers throughout the implementation.

### Study population and recruitment

All eligible RHD registrants will be approached by trained study staff, the study explained and thereafter registrants will be invited to participate in decentralization. Registrants will be presented with the option to receive their care at one of the four community HCs selected in each district that is closest to them. Participation for all participants is voluntary and informed consent or assent from a parent or guardian (for those > 8 but < 18 years) will be sought and signed before enrolment.

### Participant eligibility

**Inclusion criteria.** Eligible participants for decentralization will be all RHD registrants who live within 20 km of a participating health center.

**Exclusion criteria.** Registrants will be ineligible for participation if they have severe RHD - shown to be associated with an increased risk of a vasovagal mediated sudden deterioration during or immediately after a BPG injection; caution has been issued on BPG use in this population (35). According to these recommendations, we will exclude patients with severe mitral stenosis, severe aortic regurgitation or stenosis, ventricular dysfunction (EF < 50%) or with advanced symptoms (NYHA class III/IV) (35) as ascertained by echocardiography performed within 6 months prior to decentralization.

Registrants consenting to decentralization will have the necessary information regarding their care at HCs given to them during their last visit at the regional hospital, after which successive registration of health center nurses to the ACT application will commence. Given the novelty of systematic RHD SAP delivery in clinics, the research team will be on-site (at the health centers) for the first week and frequently thereafter, according to a documented schedule in order to provide the necessary support during this period. This will be phased out slowly over three to six months. As one of the key implementation strategies, we purposefully planned to re-examine implementation activities- including patient flow at clinics and the use of ACT for patient management. Any challenges identified will be attended to through a feedback process between healthcare workers in health centers, the research team and study administrators.

### Implementation outcomes

For the primary implementation outcome, BPG adherence will be measured as a proxy for post-implementation healthcare utilization among registrants. The annualized proportion of persons who have  $\geq 80\%$  of days covered pre- and post-decentralization will be compared. At the individual level, adherence is calculated as the proportion of days covered over days prescribed BPG (Table 3). Data will be obtained from the ACT application and RHD REDCap registry for baseline pre-decentralization adherence data. Based on our hypothesis, we will be testing for non-inferiority of SAP adherence, post-implementation.

The taxonomy of implementation constructs proposed by Proctor et al. (36) will be used to guide the data collection, levels of analysis, and measurement of implementation outcomes, with particular emphasis on acceptability, adoption, penetration, and implementation cost.

Pre-implementation, formative research was planned among stakeholders in the two districts to ensure ADD-RHD is suitable and feasible. Facility surveys will collect monthly data on clinic staff numbers and roles, availability of drugs (which will inform drug-stock outs) and consumables - with

particular emphasis on RHD care-relevant supplies. We will evaluate the implementation outcomes of acceptability, adoption and penetration by conducting a concurrent mixed methods evaluation of the ADD-RHD program (Table 4). Pre/post decentralization patient and provider qualitative interviews using semi-structured questionnaires have been planned within a month prior to decentralization to get in-depths perspectives from potential participants, including foreseen barriers to program roll-out. This was intended to be formative, and no formal framework will be used. However, six key areas of interest pertaining to decentralization were used to develop *a priori* data extraction template. A matrix-based rapid qualitative analysis will be done and themes and sub-themes generated will enable the incorporation of findings in real-time to optimize the decentralization of RHD care. This was planned as part of implementation iteration (together with a staggered roll-out in Lira and then Gulu district), for quality improvement.

Database queries, anecdotes, user inquiries and field diaries from support staff will be kept to inform challenges and successes of implementation. In particular, we will collect data on patient use of health centers and return rates (if any) to the regional hospital that will inform acceptability (Table 4). A sub-study will evaluate costs, as an important implementation outcome. High out of pocket (OOP) costs have been previously documented to be associated with the current centralized care (3). It is postulated that a decentralized model will result in reduction of OOP expenditures. To enable this evaluation, pre-planned patient surveys, time and motion studies and facility cost data will be used in an embedded economic evaluation and reported separately from the main study. Furthermore, time and motion studies will be incorporated to evaluate any disruptions to care and potential distribution of valuable manpower resources which will be valuable for planning and scaling the intervention if it were successful.

### Secondary clinical outcomes

Information on secondary clinical outcomes will be reported (Table 3). We will assess the non-inferiority of the decentralized registry on rates of retention at two years post implementation (Table 3). Further, a composite of adverse cardiovascular events, including a combination of new or worsening heart failure, recurrent ARF, atrial fibrillation, infective endocarditis and mortality will be documented during decentralization and records extracted for baseline period rates. In an exploratory analysis, using continuous measures of adherence, we will compare event rates among more- and less-adherent participants to validate the purported dose-response relationship between SAP and ARF, clinical progression of RHD in this context.

### Statistical considerations

The primary outcome of the study is to determine whether adherence after decentralization is non-inferior to the baseline adherence recorded for national RHD registry. We propose a one-sided exact binomial test at  $\alpha = 0.025$  of the null hypothesis that the proportion of adherent patients during the intervention period is less than baseline by more than 10%. Based on previous experience with this patient population, we expect approximately 150 - 200 persons with RHD will contribute data on adherence during the baseline and intervention periods in Lira and Gulu. We also approximate 75% of these patients will receive 80% of BPG injections. Table 4 provides the expected power ( $1 - \beta$ ) for plausible values of the sample size ( $n$ ), baseline percent adherent (BPA), and non-inferiority margin. Based on these assumptions, for  $\alpha = 0.025$  (one-sided) taking a total of between 150 - 200 participants will provide between 72 - 86% power to reject the null hypothesis of inferiority when the baseline percent adherent is 75% and the NIM is -10%. Thus, we expect to be at least moderately powered to reject the null hypothesis of inferiority at the proposed non-inferiority margin.

## DISCUSSION

1  
2  
3  
4 Like many chronic diseases, the successful prevention of RHD entails optimum adherence to monthly  
5 BPG injections, the cornerstone of RHD control. Decentralization of health services has long been  
6 advocated as a means to improve health service delivery and reach (37). Successful decentralization  
7 of care to PHCs resulted in the widespread availability and accessibility of HIV treatments in similar  
8 settings, playing a key role in HIV program successes (38). Disease registries have been previously  
9 advocated in the early 2000s by organizations such as World Health Federation and RHD Action (39),  
10 which outlined minimum standards and guidance for RHD registries. However, these efforts have  
11 seen variable country uptake, often characterized by centralized registries, fragile paper records and  
12 limitations in quality assurance and continuous monitoring. To date, no modern version of a  
13 decentralized national RHD registry currently exists in LMICs. The ACT application, one of the  
14 packages of implementation strategies, was designed to mitigate the static nature of registries and  
15 further aid health workers in managing RHD secondary prevention. If successful, this will modernize  
16 how we approach RHD secondary prevention in Uganda and other similar settings, where RHD is  
17 prevalent. Based on this, and through long-standing partnerships encompassing local, regional and  
18 district key stakeholder engagement, we established the feasibility and suitability of ADD-RHD.  
19  
20  
21

22 ACT is a novel technology-enabled dynamic application that integrates features to empower health  
23 workers at all levels of care with supportive tools to track, monitor and better engage RHD patients.  
24 In addition, the application will facilitate health center communication channels to responsible  
25 bodies, such as relevant persons in medical supplies and the ministry of health, an important aspect  
26 to ensure availability of medicines, supplies and quality improvement. Electronic medical records are  
27 yet to be incorporated widely in health facilities in Uganda, hence the tailored simplification for  
28 PHCs and initial support provided by the current research collaborative will be valuable and presents  
29 a potential for its absorption into future EMR expansion plans (27). Ultimately, the study can be used  
30 as a model for chronic disease management by informing how we integrate these digital health  
31 systems to enhance patient care in similar settings where HCWs are not necessarily well-versed with  
32 computers or technology.  
33  
34  
35

36 We acknowledge some limitations to this study. Firstly, the study design was not according to  
37 conventional methods for establishing causality for the reasons previously mentioned. We  
38 acknowledge the fixed sample size, reflecting the limited cases currently identified and established  
39 in the registry from previous screening efforts. The use of fairly robust and more comprehensive  
40 mixed-methods with the additional collection of more granular data was designed to mitigate some  
41 of these limitations. Another potential limitation is around the ACT application, requiring baseline  
42 user comfort with technology and smart phones, which was not the case with some community  
43 public health workers. The pilot training informed the development of a simplified application  
44 version tailored specifically to the roles of the HCWs (27). In addition, internet connectivity is often  
45 unstable in this setting, which informed the incorporation of an offline feature function that may  
46 enhance the functionality and uptake of the application. Lastly, several other system-level factors  
47 pose potential challenges, including long waiting times, staff shortages and drug availability that are  
48 generalizable country-wide, but which may impact implementation. Securing medication by use of  
49 external resources in the initial period limits the generalizability without modifications to the health  
50 system. However, it demonstrates the values of securing supplies to make improvements and  
51 signifies more work needs to be done in this area. Ultimately, through the project, there is an  
52 opportunity to re-design and equip PHCs to overcome some of these barriers to healthcare and  
53 serve as a foundation for scaling up much needed RHD services to different parts of the country.  
54  
55  
56  
57  
58  
59  
60

## CONCLUSION

Rheumatic heart disease is attributed to a large burden of premature cardiovascular morbidity and mortality in endemic countries. Despite evidence regarding SAP, endemic areas are defined by poor health-seeking behavior, limited access to healthcare, and challenges around centralized and static registries. This study was designed to address previous obstacles documented in the country - highlighting barriers to life-saving secondary prevention. Overall, the successful implementation of the study and hence availability of service at PHCs closer to registrants' residences may benefit the country at large given the potential it presents for scaling up RHD care in other districts. We believe the current relationships fostered over years with regional registry sites, local government and national government will serve as a stepping stone for successful decentralization, increasing access to BPG prophylaxis and working towards achieving the control of rheumatic heart disease countrywide.

**Word count: 3975**

### Study Status

The ADD-RHD study was initially approved on 04/03/2021. Decentralization of study participants is currently being finalized in the second site and post-decentralization data collection will follow for 12 months to December 2023. Data analysis is planned to start early 2024, with the full project due for completion in April 2024.

### LIST OF ABBREVIATIONS

**ACT:** Active Community Case Management Tool

**ADD-RHD:** Active Case Detection and Decentralized Dynamic Registry to Improve the Uptake of Rheumatic Heart Disease

**ARF:** Acute Rheumatic Fever

**BPG:** Benzathine Penicillin G

**EMR:** Electronic Medical Records

**HC III/IV:** Health Center III/IV

**HCW:** health Care Worker

**LMIC:** Low- and middle Income country

**MOH:** Ministry of Health

**OOP:** Out of Pocket

**PHC:** Primary Health Care

**RHD:** Rheumatic Heart Disease

**SAP:** Secondary Antibiotic Prophylaxis

### DECLARATIONS

#### Ethics approval and consent to participate

This protocol was reviewed and approved by the Institutional Review Board (IRB) at Cincinnati Children's Hospital Medical Center, and Makerere University School of Medicine Research Ethics Committee (Mak-SOMREC-2021-61).

#### Consent for publication

Not applicable

### Availability of data and materials

Data collection instruments are available on request as supplementary documents

### Competing interests

The authors declare that they have no competing interests

### Funding

The ADD-RHD study was funded through the AHA SFRN Grant 20SFRN35380042.

Redcap registry was supported by Clinical and Translational Science Award (CTSC) UL1TR002548.

### Author Contributions

AB, DW, EO, CL, CS, JR and KD initially conceptualized the different aspects of the study. DW, KD, AB, NM, JP, JR, EO, NO, JD, SdL, RS, NF and JA contributed to the study design and proposal. NM, JP, JR, NF, SdL, RS, JA, JK, DN, LM, FO, HN, YS, KD, & DW contributed to the implementation aspects of the study. NM, DW, AB, KD wrote the initial draft of the protocol paper. All authors reviewed, updated and approved the final protocol.

### Acknowledgements

The authors would like to thank all the local and international stakeholders who contributed to the refinement of this protocol, as well as the staff at the central, district and local health center who volunteered their time and inputs to the logistical aspects of decentralization planning. Sincere thanks to Nicholas Felicelli, Kristen Tillman, Riley Morrison and other members from the design team who contributed to the ACT application build.

### REFERENCES

1. Ghamari S-H, Kangevari MA-, Moghaddam SS. Rheumatic Heart Disease Is a Neglected Disease Relative to Its Burden Worldwide : Findings From Global Burden of Disease 2019. 2022;11(e025284).
2. Zühlke L, Karthikeyan G, Engel ME, Rangarajan S, Mackie P, Cupido-Katya Mauff B, et al. Clinical Outcomes in 3343 Children and Adults with Rheumatic Heart Disease from 14 Low- and Middle-Income Countries: Two-Year Follow-Up of the Global Rheumatic Heart Disease Registry (the REMEDY Study). *Circulation*. 2016;134(19):1456–66.
3. Opara CC, Du Y, Kawakatsu Y, Atala J, Beaton AZ, Kansiime R, et al. Household Economic Consequences of Rheumatic Heart Disease in Uganda. *Front Cardiovasc Med*. 2021;8.
4. Watkins DA, Johnson CO, Colquhoun SM, Karthikeyan G, Beaton A, Bukhman G, et al. Global, regional, & national burden of rheumatic heart disease, 1990-2015. *N Engl J Med*. 2017;377(8):713–22.
5. Okello E, Kakande B, Sebatta E, Kayima J, Kuteesa M, Mutatina B, et al. Socioeconomic and environmental risk factors among rheumatic heart disease patients in Uganda. *PLoS One*. 2012;7(8).
6. Steer AC. Historical aspects of rheumatic fever. Vol. 51, *Journal of Paediatrics and Child Health*. 2015.
7. Australian Institute of Health and Welfare (AIHW). Rheumatic heart disease and acute rheumatic fever in Australia: 1996-2012. *Cardiovasc Dis Ser*. 2013;36(CVD 60).
8. Carapetis JR, Beaton A, Cunningham MW, Guilherme L, Karthikeyan G, Mayosi BM, et al. Acute rheumatic fever and rheumatic heart disease. *Nat Rev Dis Prim*. 2016;2.
9. World Health Organization. HIV/AIDS Key Facts [Internet]. 2021. Available from:



- 1  
2  
3  
4  
5  
6  
7  
8  
9  
10  
11  
12  
13  
14  
15  
16  
17  
18  
19  
20  
21  
22  
23  
24  
25  
26  
27  
28  
29  
30  
31  
32  
33  
34  
35  
36  
37  
38  
39  
40  
41  
42  
43  
44  
45  
46  
47  
48  
49  
50  
51  
52  
53  
54  
55  
56  
57  
58  
59  
60
- <https://www.who.int/news-room/fact-sheets/detail/hiv-aids>
10. Seventy-first World Health Assembly. Rheumatic Fever and Rheumatic Heart Disease [Internet]. Available from: [https://apps.who.int/gb/ebwha/pdf/WHA71/A71\\_R14-en.pdf](https://apps.who.int/gb/ebwha/pdf/WHA71/A71_R14-en.pdf)
  11. White A. WHO Resolution on rheumatic heart disease. *Eur Heart J*. 2018;39(48).
  12. Gerber MA, Baltimore RS, Eaton CB, Gewitz M, Rowley AH, Shulman ST, et al. Prevention of rheumatic fever and diagnosis and treatment of acute streptococcal pharyngitis: A scientific statement from the American Heart Association Rheumatic Fever, Endocarditis, and Kawasaki Disease Committee of the Council on Cardiovascular Disease i. *Circulation*. 2009;119(11):1541–51.
  13. Rothenbühler M, O’Sullivan CJ, Stortecky S, Stefanini GG, Spitzer E, Estill J, et al. Active surveillance for rheumatic heart disease in endemic regions: A systematic review and meta-analysis of prevalence among children and adolescents. *Lancet Glob Heal* [Internet]. 2014;2(12):e717–26. Available from: [http://dx.doi.org/10.1016/S2214-109X\(14\)70310-9](http://dx.doi.org/10.1016/S2214-109X(14)70310-9)
  14. Manyemba J, Mayosi BM. Penicillin for secondary prevention of rheumatic fever. *Cochrane Database Syst Rev*. 2002;
  15. de Dassel JL, de Klerk N, Carapetis JR, Ralph AP. How many doses make a difference? An analysis of secondary prevention of rheumatic fever and rheumatic heart disease. *J Am Heart Assoc*. 2018;7(24).
  16. Zimmerman M, Kitooleko S, Okello E, Ollberding N, Sinha P, Mwambu T, et al. Clinical outcomes of children with rheumatic heart disease. *Heart* [Internet]. 2022 Apr 1;108(8):633 LP – 638. Available from: <http://heart.bmj.com/content/108/8/633.abstract>
  17. Edwards JG, Barry M, Elsayed M. Health System Factors Serving as Facilitators and Barriers to Rheumatic Heart Disease Care in Sudan. *Res Sq*. 2021;
  18. Kevat PM, Reeves BM, Ruben AR, Gunnarsson R. Adherence to Secondary Prophylaxis for Acute Rheumatic Fever and Rheumatic Heart Disease: A Systematic Review. *Curr Cardiol Rev*. 2017;13(2):155–66.
  19. Huck DM, Nalubwama H, Longenecker CT, Frank SH, Okello E, Webel AR. A qualitative examination of secondary prophylaxis in rheumatic heart disease: Factors influencing adherence to secondary prophylaxis in Uganda. *Glob Heart* [Internet]. 2015;10(1):63-69.e1. Available from: <http://dx.doi.org/10.1016/j.gheart.2014.10.001>
  20. Longenecker CT, Morris SR, Aliku TO, Beaton A, Costa MA, Kamya MR, et al. Rheumatic heart disease treatment cascade in Uganda. *Circ Cardiovasc Qual Outcomes*. 2017;10(11).
  21. Okello E, Longenecker CT, Scheel A, Aliku T, Rwebembera J, Mirembe G, et al. Impact of regionalisation of a national rheumatic heart disease registry: The Ugandan experience. *Heart Asia*. 2018;10(1):1–5.
  22. Remenyi B, Carapetis J, Wyber R, Taubert K, Mayosi BM. Position statement of the World Heart Federation on the prevention and control of rheumatic heart disease. *Nat Rev Cardiol*. 2013;10(5):284–92.
  23. Karthikeyan G, Zühlke L, Engel M, Rangarajan S, Yusuf S, Teo K, et al. Rationale and design of a Global Rheumatic Heart Disease Registry: The REMEDY study. *Am Heart J*. 2012;163(4).
  24. Rémond MGW, Coyle ME, Mills JE, Maguire GP. Approaches to improving adherence to secondary prophylaxis for rheumatic fever and rheumatic heart disease: A literature review with a global perspective. Vol. 24, *Cardiology in Review*. 2016.
  25. Zühlke LJ, Watkins DA, Perkins S, Wyber R, Mwangi J, Markbreiter J, et al. A Comprehensive Needs Assessment Tool for Planning RHD Control Programs in Limited Resource Settings. *Glob Heart*. 2017;12(1):25–31.
  26. Kredo T, Ford N, Adeniyi FB, Garner P. Decentralising HIV treatment in lower- and middle-income countries. Vol. 2013, *Cochrane Database of Systematic Reviews*. 2013.
  27. Sarah R. de Loizaga, Jafes Pulle, Joselyn Rwebembera, Jessica Abrams, Jenifer Atala, Emily Chesnut et al. Development and Pilot of the Active Community Case Management Tool (ACT Platform): A dynamic tool for rheumatic heart disease case management in Uganda.

- 1
  - 2
  - 3
  - 4
  - 5
  - 6
  - 7
  - 8
  - 9
  - 10
  - 11
  - 12
  - 13
  - 14
  - 15
  - 16
  - 17
  - 18
  - 19
  - 20
  - 21
  - 22
  - 23
  - 24
  - 25
  - 26
  - 27
  - 28
  - 29
  - 30
  - 31
  - 32
  - 33
  - 34
  - 35
  - 36
  - 37
  - 38
  - 39
  - 40
  - 41
  - 42
  - 43
  - 44
  - 45
  - 46
  - 47
  - 48
  - 49
  - 50
  - 51
  - 52
  - 53
  - 54
  - 55
  - 56
  - 57
  - 58
  - 59
  - 60
28. Curran GM, Bauer M, Mittman B, Pyne JM, Stetler C. Effectiveness-implementation hybrid designs: Combining elements of clinical effectiveness and implementation research to enhance public health impact. *Med Care*. 2012;50(3).
29. Harris PA, Taylor R, Thielke R, Payne J, Gonzalez N, Conde JG. Research electronic data capture (REDCap)-A metadata-driven methodology and workflow process for providing translational research informatics support. *J Biomed Inform*. 2009;42(2).
30. Harris PA, Taylor R, Minor BL, Elliott V, Fernandez M, O'Neal L, et al. The REDCap consortium: Building an international community of software platform partners. Vol. 95, *Journal of Biomedical Informatics*. 2019.
31. Watkins DA, Beaton AZ, Carapetis JR, Karthikeyan G, Mayosi BM, Wyber R, et al. Rheumatic Heart Disease Worldwide: JACC Scientific Expert Panel. *J Am Coll Cardiol*. 2018;72(12):1397–416.
32. Tompkins DG, Boxerbaum B, Liebman J. Long-term prognosis of rheumatic fever patients receiving regular intramuscular benzathine penicillin. *Circulation*. 1972;45(3).
33. Powell BJ, Waltz TJ, Chinman MJ, Damschroder LJ, Smith JL, Matthieu MM, et al. A refined compilation of implementation strategies: Results from the Expert Recommendations for Implementing Change (ERIC) project. *Implement Sci*. 2015;10(1).
34. Ndagire E, Kawakatsu Y, Nalubwama H, Atala J, Sarnacki R, Pulle J, et al. Examining the ugandan health system's readiness to deliver rheumatic heart disease-related services. *PLoS Negl Trop Dis* [Internet]. 2021;15(2):1–16. Available from: <http://dx.doi.org/10.1371/journal.pntd.0009164>
35. Sanyahumbi A, Ali S, Benjamin IJ, Karthikeyan G, Okello E, Sable CA, et al. Penicillin Reactions in Patients With Severe Rheumatic Heart Disease: A Presidential Advisory From the American Heart Association. *J Am Heart Assoc*. 2022;11(5):1–9.
36. Proctor E, Silmere H, Raghavan R, Hovmand P, Aarons G, Bunker A, et al. Outcomes for implementation research: Conceptual distinctions, measurement challenges, and research agenda. *Adm Policy Ment Heal Ment Heal Serv Res*. 2011;38(2).
37. Bossert T. Analyzing the decentralization of health systems in developing countries: Decision space, innovation and performance. *Soc Sci Med*. 1998;47(10).
38. Geng EH, Nash D, Kambugu A, Zhang Y, Braitstein P, Christopoulos KA, et al. Retention in care among HIV-infected patients in resource-limited settings: Emerging insights and new directions. Vol. 7, *Current HIV/AIDS Reports*. 2010.
39. RHD Action. RHD Registers [Internet]. [cited 2022 Oct 26]. Available from: <https://rhdaction.org/control/rhd-registers>



## LIST OF TABLES

**Table 1.** Comparison of current and proposed SAP delivery approaches

|                                                                                                                                                                                                      | <b>Current Approach – National RHD Registry</b>                                                                                                                                                                                                                                                                  | <b>Proposed approach – Decentralized RHD Registry at district level health facilities</b>                                                                                                                                                                                                                                                                                                                                                                                                                                                                                                                                                                                   |
|------------------------------------------------------------------------------------------------------------------------------------------------------------------------------------------------------|------------------------------------------------------------------------------------------------------------------------------------------------------------------------------------------------------------------------------------------------------------------------------------------------------------------|-----------------------------------------------------------------------------------------------------------------------------------------------------------------------------------------------------------------------------------------------------------------------------------------------------------------------------------------------------------------------------------------------------------------------------------------------------------------------------------------------------------------------------------------------------------------------------------------------------------------------------------------------------------------------------|
| <b>Location</b>                                                                                                                                                                                      | Limited to central and regional referral centers                                                                                                                                                                                                                                                                 | Expansion to Health center III/IV (Lira and Gulu districts)                                                                                                                                                                                                                                                                                                                                                                                                                                                                                                                                                                                                                 |
| <b>Staff</b>                                                                                                                                                                                         | Dedicated research staff regionally                                                                                                                                                                                                                                                                              | This approach will incorporate existing MOH staff at HCIII/IV at district and regional hospitals, as well as administrators and different stakeholders from Ministerial representatives                                                                                                                                                                                                                                                                                                                                                                                                                                                                                     |
| <b>Patient records and data</b>                                                                                                                                                                      | REDCap/paper-based clinical records <ul style="list-style-type: none"> <li>• Web-based electronic database largely supporting research activities</li> <li>• A mix of direct entry and transfer of paper records have been used.</li> <li>• Not scalable; not enabled to support clinical management.</li> </ul> | ACT application <ul style="list-style-type: none"> <li>• Keeps track of BPG injections</li> <li>• Automatic adherence calculation</li> <li>• Intended for direct entry by HCWs</li> <li>• Managing patient features categorized for ‘due’ and ‘missed’ injections</li> <li>• Iterative – patient reminder integration and tracking; clinician/specialist/MOH representative communication features</li> <li>• Quality metrics - Allows easily generated quality reports for examining overall adherence, referrals for procedures and the ability to compare across facilities and regions. Potentially scalable nationwide for RHD and other chronic illnesses.</li> </ul> |
| SAP, Secondary Antibiotic Prophylaxis; RHD, Rheumatic Heart Disease; HC III/IV, Health Center III/IV; MOH, Ministry of Health; ACT – Active Community Case Management Tool; HCW – Health Care Worker |                                                                                                                                                                                                                                                                                                                  |                                                                                                                                                                                                                                                                                                                                                                                                                                                                                                                                                                                                                                                                             |

**Table 2.** ADD-RHD Implementation strategies mapped according to Expert Recommendations for Implementing Change (ERIC) discreet implementation strategies (33)

| Strategy                                                                                                                                                                                                    | Details                                                                                                                                                                                                                                                                                                                                                                                                                                                                                                                                                                                                                                                                          |
|-------------------------------------------------------------------------------------------------------------------------------------------------------------------------------------------------------------|----------------------------------------------------------------------------------------------------------------------------------------------------------------------------------------------------------------------------------------------------------------------------------------------------------------------------------------------------------------------------------------------------------------------------------------------------------------------------------------------------------------------------------------------------------------------------------------------------------------------------------------------------------------------------------|
| Assess for readiness and identify barriers and facilitators                                                                                                                                                 | Assessment for readiness will be done through facility visits, surveys, and engagement of local and district health officers (DHO). Patient and provider interviews will identify barriers and facilitators to decentralization. Key stakeholder and community engagement on decentralization logistics will serve to establish key components of the process.                                                                                                                                                                                                                                                                                                                   |
| Change of service sites (decentralization)                                                                                                                                                                  | Four health facilities were identified based on patient clusters and distances from their residences primarily geared at increasing access and reducing distances travelled.                                                                                                                                                                                                                                                                                                                                                                                                                                                                                                     |
| Training Health Care workers (HCWs)/ develop educational materials                                                                                                                                          | HCW training was planned to include the development of education materials on RHD clinical knowledge, BPG preparation and injection skills, penicillin adverse events recognition and first aid management. A detailed description is provided below.                                                                                                                                                                                                                                                                                                                                                                                                                            |
| Change record systems                                                                                                                                                                                       | ACT application was specifically developed as a clinical tool for HCWs through stakeholder engagement and piloting (27). It encompasses in-built tools to enhance patient engagement, including clinicians' monitoring of adherence and quality metrics for monitoring supply stocks. This will replace the current regional registry. A detailed description is provided below.                                                                                                                                                                                                                                                                                                 |
| Purposefully re-examine the implementation                                                                                                                                                                  | We built in milestones to re-examine implementation activities, identify challenges, and provide feedback and support to health facilities in order to continuously improve the quality of care. This includes looking at the use of ACT for patient management, identifying challenges and giving feedback to healthcare workers in health centers.                                                                                                                                                                                                                                                                                                                             |
| Identify and prepare champions                                                                                                                                                                              | Initial assessment for readiness informed the need for local champions at each health center, selected to drive the implementation by providing support and driving quality improvement activities such as updating stock and supplies data for quality metrics on the ACT application.                                                                                                                                                                                                                                                                                                                                                                                          |
| Physical supply of medicines*                                                                                                                                                                               | Although historically used to treat other conditions, such as syphilis, its consistent availability is variable in public facilities in Uganda. Hence, through stakeholder and local engagement, temporary BPG supply was found to be an essential initial component to the success of the intervention at a few facilities. This marked an iterative adaptation in light of short-term regulatory constraints. For some facilities, increasing BPG supply through the government system was motivated by history of use, and hence a gap in supply was inevitable during the initial post-decentralization period. Covering this gap was an important aspect to implementation. |
| *Not a specific ERIC implementation strategy. DHO, District Health Officer; HCW, Health Care Worker; RHD, Rheumatic Heart Disease; ACT, Active Community Case Management Tool; BPG, Benzathine Penicillin G |                                                                                                                                                                                                                                                                                                                                                                                                                                                                                                                                                                                                                                                                                  |

**Table 3. Key metrics collected during baseline data collection**

| Primary Metric                                                                                                             | Operational Definition                                                                                                                                                                                                                                                                                                         | Collection Method                                                                                                                                    |
|----------------------------------------------------------------------------------------------------------------------------|--------------------------------------------------------------------------------------------------------------------------------------------------------------------------------------------------------------------------------------------------------------------------------------------------------------------------------|------------------------------------------------------------------------------------------------------------------------------------------------------|
| BPG Adherence                                                                                                              | <p>The proportion of persons who have 80% of days covered. Each registrants' days of coverage will be calculated as:</p> <p>Days of coverage (%) = Days with adequate BPG coverage*/Days prescribed BPG.</p> <p>*Adequate BPG coverage defined as the prescribed interval between BPG injection (i.e. 28, 21, or 14 days).</p> | National Registry and ACT application, based on dates of injections as compared to prescription                                                      |
| Secondary Metrics                                                                                                          | Operational Definition                                                                                                                                                                                                                                                                                                         | Collection Method                                                                                                                                    |
| Retention                                                                                                                  | Defined as being seen at least twice in a 12-month period for clinical review (outside or in conjunction with BPG delivery)                                                                                                                                                                                                    | National Registry and ACT application                                                                                                                |
| Composite Adverse CV events                                                                                                | Combination of new or worsening heart failure, atrial fibrillation, infective endocarditis, and/or recurrent ARF                                                                                                                                                                                                               | National Registry and ACT application, supplemented as needed by patient interview                                                                   |
| RHD Mortality                                                                                                              | Death of an RHD registrant that is determined to be the direct or indirect result of RHD.                                                                                                                                                                                                                                      | Multimodality, direct report from family or hospital/clinic if death was witnessed by medical staff                                                  |
| BPG Stockouts                                                                                                              | # days with no BPG or BPG-related supplies (needles, syringes, dilutant, lidocaine, etc.) to be tracked individually, and # of days at <20% supply (based on anticipated number of RHD registrants assigned to that clinical location)                                                                                         | ONLY tracked during decentralized care, through both stock inventory by our research staff (monthly surveillance) and reports on the ACT application |
| BPG, Benzathine Penicillin G; ACT, Active Community Case Management Tool; CV, cardiovascular; RHD, Rheumatic Heart Disease |                                                                                                                                                                                                                                                                                                                                |                                                                                                                                                      |

**Table 4. Data sources for the evaluation of implementation outcomes**

|                                                                                                | Provider Level                                                                                                                                | Patient Level                                                                                             | Facility Level                                                                                                                                        | ACT Application Audits                                                                                                                                                                                                                        | Record Audit at RRH Visits                                                                                   |
|------------------------------------------------------------------------------------------------|-----------------------------------------------------------------------------------------------------------------------------------------------|-----------------------------------------------------------------------------------------------------------|-------------------------------------------------------------------------------------------------------------------------------------------------------|-----------------------------------------------------------------------------------------------------------------------------------------------------------------------------------------------------------------------------------------------|--------------------------------------------------------------------------------------------------------------|
| Acceptability                                                                                  | Provider pre-/post-decentralization interviews                                                                                                | Patient pre-/post-decentralization interviews<br>Coded under acceptability and Health setting preferences | Administrator interview                                                                                                                               | ACT usage audit/data queries<br>Documented ACT application changes                                                                                                                                                                            | RRH injection record audits;<br>Self-decentralization rates and rates of return to RRH post-decentralization |
| Adoption                                                                                       | Provider pre-/post-decentralization interviews.<br>Observation<br>Time & Motion study                                                         | N/A                                                                                                       | Monthly Health facility survey - organization & appropriateness of RHD medicinal and supplies order based on need.<br><br>Direct observation          | Provider pre-/post-decentralization interviews.<br>ACT usage audit;<br>-Trends of use by HC nurses<br>-Completeness of BPG injections<br>-Use of additional features (Reminder & Update of stock alerts)                                      | Examination of entered data on BPG card versus ACT application                                               |
| Penetration                                                                                    | Provider pre-/post-decentralization interviews.<br>Attendance to RHD cases.<br>Numbers of providers trained versus numbers delivering service | N/A                                                                                                       | Monthly Health facility survey - Improvements in medicinal (BPG) and supply shortages<br>Direct observation<br><br>Regular attendance of RHD patients | Query-generation rates on ACT application<br>Use of paper records for RHD care<br>ACT usage by HC nurses – completion of information and other usage parameters overtime<br>Rates of re-education for HC nurses on deficient areas identified | Reduction in BPG visits to RRH services for decentralized registrants                                        |
| RRH, Regional referral hospital; ACT, Active community case management tool; HC, Health Center |                                                                                                                                               |                                                                                                           |                                                                                                                                                       |                                                                                                                                                                                                                                               |                                                                                                              |

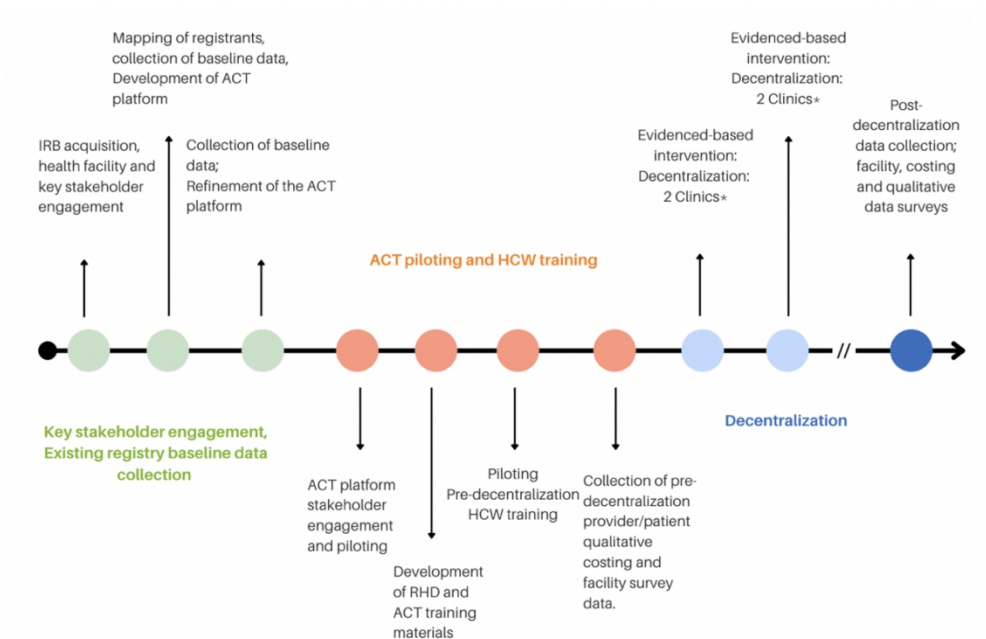

Figure 1. Sequential outline of ADD-RHD implementation plans for Lira. ADD-RHD, Active Case Detection and Decentralized Dynamic Registry to Improve the Uptake of Rheumatic Heart Disease Secondary Prevention; ACT, Active Community Case Management Tool; IRB, Institutional Review Board; HCW, Health Care Worker

576x389mm (57 x 57 DPI)

1  
2  
3  
4  
5  
6  
7  
8  
9  
10  
11  
12  
13  
14  
15  
16  
17  
18  
19  
20  
21  
22  
23  
24  
25  
26  
27  
28  
29  
30  
31  
32  
33  
34  
35  
36  
37  
38  
39  
40  
41  
42  
43  
44  
45  
46  
47  
48  
49  
50  
51  
52  
53  
54  
55  
56  
57  
58  
59  
60

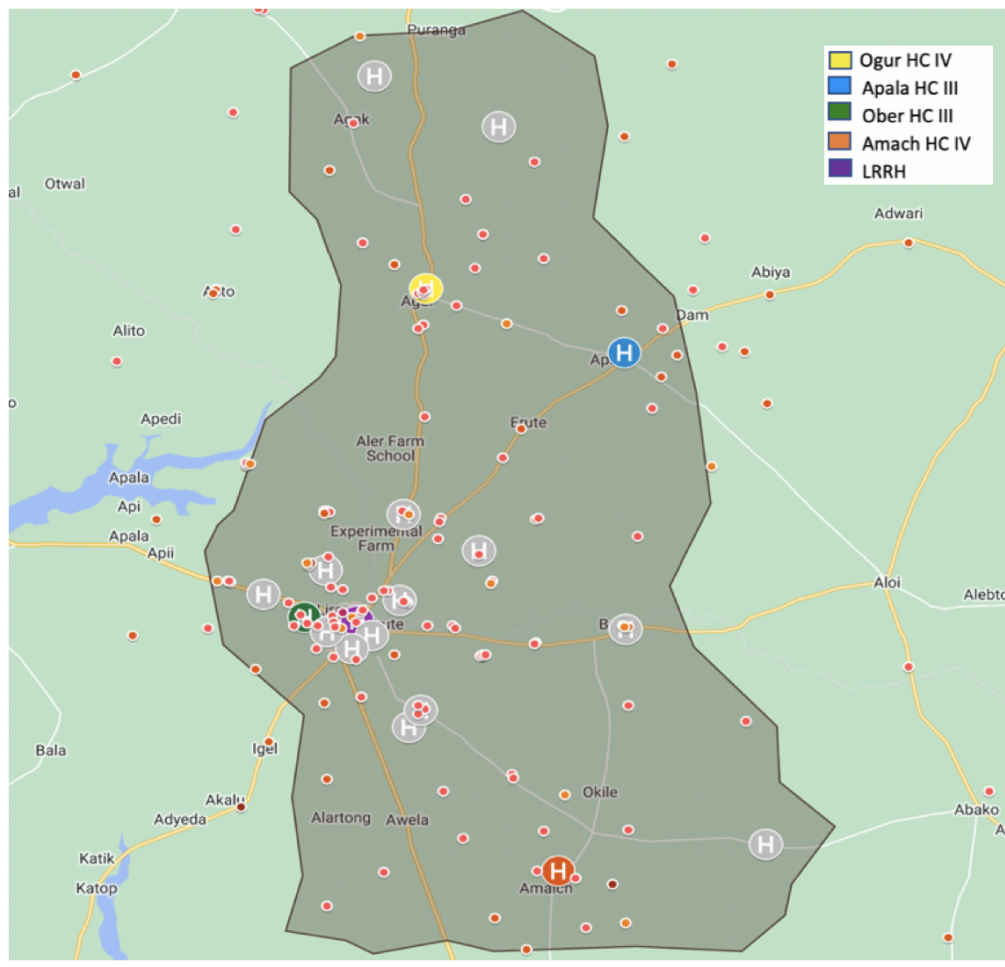

Figure 2. The four selected health centers in Lira according to RHD registrants' geographical density. Identified health centers are HCIV (Ogur, Amach) and HC III (Ober and Apala). LRRH, Lira Regional Referral Hospital; HC, Health Centre

507x483mm (57 x 57 DPI)

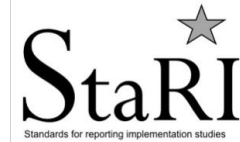

## Standards for Reporting Implementation Studies: the StaRI checklist for completion

The StaRI standard should be referenced as: Pinnock H, Barwick M, Carpenter C, Eldridge S, Grandes G, Griffiths CJ, Rycroft-Malone J, Meissner P, Murray E, Patel A, Sheikh A, Taylor SJC for the StaRI Group. Standards for Reporting Implementation Studies ([StaRI statement](#)). *BMJ* 2017;356:i6795

The detailed Explanation and Elaboration document, which provides the rationale and exemplar text for all these items is: Pinnock H, Barwick M, Carpenter C, Eldridge S, Grandes G, Griffiths C, Rycroft-Malone J, Meissner P, Murray E, Patel A, Sheikh A, Taylor S, for the StaRI group. Standards for Reporting Implementation Studies ([StaRI Explanation and Elaboration document](#)). *BMJ Open* 2017 2017;7:e013318

Notes: A key concept of the StaRI standards is the dual strands of describing, on the one hand, the implementation strategy and, on the other, the clinical, healthcare, or public health intervention that is being implemented. These strands are represented as two columns in the checklist.

The primary focus of implementation science is the implementation strategy (column 1) and the expectation is that this will always be completed.

The evidence about the impact of the intervention on the targeted population should always be considered (column 2) and either health outcomes reported or robust evidence cited to support a known beneficial effect of the intervention on the health of individuals or populations.

The StaRI standards refers to the broad range of study designs employed in implementation science. Authors should refer to other reporting standards for advice on reporting specific methodological features. Conversely, whilst all items are worthy of consideration, not all items will be applicable to, or feasible within every study.

| Checklist item            | Reported on page # | Implementation Strategy                                                  | Reported on page # | Intervention                                                                                                                                                                                                                |
|---------------------------|--------------------|--------------------------------------------------------------------------|--------------------|-----------------------------------------------------------------------------------------------------------------------------------------------------------------------------------------------------------------------------|
|                           |                    | “Implementation strategy” refers to how the intervention was implemented |                    | “Intervention” refers to the healthcare or public health intervention that is being implemented.                                                                                                                            |
| <b>Title and abstract</b> |                    |                                                                          |                    |                                                                                                                                                                                                                             |
| Title                     | 1                  | 1                                                                        |                    | Identification as an implementation study, and description of the methodology in the title and/or keywords                                                                                                                  |
| Abstract                  | 2                  | 1                                                                        |                    | Identification as an implementation study, including a description of the implementation strategy to be tested, the evidence-based intervention being implemented, and defining the key implementation and health outcomes. |
| <b>Introduction</b>       |                    |                                                                          |                    |                                                                                                                                                                                                                             |
| Introduction              | 3                  | 2                                                                        |                    | Description of the problem, challenge or deficiency in healthcare or public health that the intervention being implemented aims to address.                                                                                 |
| Rationale                 | 4                  | 3                                                                        | 3, 5               | The scientific background and rationale for the intervention being implemented (including evidence about its effectiveness and how it is expected to achieve its effects).                                                  |



|                             |    |       |                                                                                                                                                                                                  |      |                                                                                                                                                       |
|-----------------------------|----|-------|--------------------------------------------------------------------------------------------------------------------------------------------------------------------------------------------------|------|-------------------------------------------------------------------------------------------------------------------------------------------------------|
| Aims and objectives         | 5  | 3     | The aims of the study, differentiating between implementation objectives and any intervention objectives.                                                                                        |      |                                                                                                                                                       |
| <b>Methods: description</b> |    |       |                                                                                                                                                                                                  |      |                                                                                                                                                       |
| Design                      | 6  | 3     | The design and key features of the evaluation, (cross referencing to any appropriate methodology reporting standards) and any changes to study protocol, with reasons                            |      |                                                                                                                                                       |
| Context                     | 7  | 4, 5  | The context in which the intervention was implemented. (Consider social, economic, policy, healthcare, organisational barriers and facilitators that might influence implementation elsewhere).  |      |                                                                                                                                                       |
| Targeted 'sites'            | 8  | 4, 6  | The characteristics of the targeted 'site(s)' (e.g. locations/personnel/resources etc.) for implementation and any eligibility criteria.                                                         | 8    | The population targeted by the intervention and any eligibility criteria.                                                                             |
| Description                 | 9  | 6 - 8 | A description of the implementation strategy                                                                                                                                                     | 5    | A description of the intervention                                                                                                                     |
| Sub-groups                  | 10 | NA    | Any sub-groups recruited for additional research tasks, and/or nested studies are described                                                                                                      |      |                                                                                                                                                       |
| <b>Methods: evaluation</b>  |    |       |                                                                                                                                                                                                  |      |                                                                                                                                                       |
| Outcomes                    | 11 | 9-11  | Defined pre-specified primary and other outcome(s) of the implementation strategy, and how they were assessed. Document any pre-determined targets                                               | 9-11 | Defined pre-specified primary and other outcome(s) of the intervention (if assessed), and how they were assessed. Document any pre-determined targets |
| Process evaluation          | 12 | 10    | Process evaluation objectives and outcomes related to the mechanism by which the strategy is expected to work                                                                                    |      |                                                                                                                                                       |
| Economic evaluation         | 13 | *     | Methods for resource use, costs, economic outcomes and analysis for the implementation strategy                                                                                                  | *    | Methods for resource use, costs, economic outcomes and analysis for the intervention                                                                  |
| Sample size                 | 14 | 11    | Rationale for sample sizes (including sample size calculations, budgetary constraints, practical considerations, data saturation, as appropriate)                                                |      |                                                                                                                                                       |
| Analysis                    | 15 | 11    | Methods of analysis (with reasons for that choice)                                                                                                                                               |      |                                                                                                                                                       |
| Sub-group analyses          | 16 | 10    | Any a priori sub-group analyses (e.g. between different sites in a multicentre study, different clinical or demographic populations), and sub-groups recruited to specific nested research tasks |      |                                                                                                                                                       |

| <b>Results</b>        |           |         |                                                                                                                                                                                                                                           |     |                                                                                                                         |
|-----------------------|-----------|---------|-------------------------------------------------------------------------------------------------------------------------------------------------------------------------------------------------------------------------------------------|-----|-------------------------------------------------------------------------------------------------------------------------|
| Characteristics       | <b>17</b> | N/A     | Proportion recruited and characteristics of the recipient population for the implementation strategy                                                                                                                                      | N/A | Proportion recruited and characteristics (if appropriate) of the recipient population for the intervention              |
| Outcomes              | <b>18</b> | N/A     | Primary and other outcome(s) of the implementation strategy                                                                                                                                                                               | N/A | Primary and other outcome(s) of the Intervention (if assessed)                                                          |
| Process outcomes      | <b>19</b> | N/A     | Process data related to the implementation strategy mapped to the mechanism by which the strategy is expected to work                                                                                                                     |     |                                                                                                                         |
| Economic evaluation   | <b>20</b> | N/A     | Resource use, costs, economic outcomes and analysis for the implementation strategy                                                                                                                                                       | N/A | Resource use, costs, economic outcomes and analysis for the intervention                                                |
| Sub-group analyses    | <b>21</b> | N/A     | Representativeness and outcomes of subgroups including those recruited to specific research tasks                                                                                                                                         |     |                                                                                                                         |
| Fidelity/adaptation   | <b>22</b> | N/A     | Fidelity to implementation strategy as planned and adaptation to suit context and preferences                                                                                                                                             | N/A | Fidelity to delivering the core components of intervention (where measured)                                             |
| Contextual changes    | <b>23</b> | N/A     | Contextual changes (if any) which may have affected outcomes                                                                                                                                                                              |     |                                                                                                                         |
| Harms                 | <b>24</b> | N/A     | All important harms or unintended effects in each group                                                                                                                                                                                   |     |                                                                                                                         |
| <b>Discussion</b>     |           |         |                                                                                                                                                                                                                                           |     |                                                                                                                         |
| Structured discussion | <b>25</b> | 12      | Summary of findings, strengths and limitations, comparisons with other studies, conclusions and implications                                                                                                                              |     |                                                                                                                         |
| Implications          | <b>26</b> | 12      | Discussion of policy, practice and/or research implications of the implementation strategy (specifically including scalability)                                                                                                           | 12  | Discussion of policy, practice and/or research implications of the intervention (specifically including sustainability) |
| <b>General</b>        |           |         |                                                                                                                                                                                                                                           |     |                                                                                                                         |
| Statements            | <b>27</b> | 13 - 14 | Include statement(s) on regulatory approvals (including, as appropriate, ethical approval, confidential use of routine data, governance approval), trial/study registration (availability of protocol), funding and conflicts of interest |     |                                                                                                                         |

# BMJ Open

## Evaluating the implementation of a dynamic digital application to enable community-based decentralization of rheumatic heart disease case management in Uganda: A hybrid type III effectiveness-implementation study protocol

|                               |                                                                                                                                                                                                                                                                                                                                                                                                                                                                                                                                                                                                                                                                                                                                                                                                                                                                                                                                                                                                                                                                                                                                                                                                                                                                                                                                                                                                                                                                                                                                                                                                                                                                                                                                                                                                                                                                                                                                                                                                                                                                                                                                                                                         |
|-------------------------------|-----------------------------------------------------------------------------------------------------------------------------------------------------------------------------------------------------------------------------------------------------------------------------------------------------------------------------------------------------------------------------------------------------------------------------------------------------------------------------------------------------------------------------------------------------------------------------------------------------------------------------------------------------------------------------------------------------------------------------------------------------------------------------------------------------------------------------------------------------------------------------------------------------------------------------------------------------------------------------------------------------------------------------------------------------------------------------------------------------------------------------------------------------------------------------------------------------------------------------------------------------------------------------------------------------------------------------------------------------------------------------------------------------------------------------------------------------------------------------------------------------------------------------------------------------------------------------------------------------------------------------------------------------------------------------------------------------------------------------------------------------------------------------------------------------------------------------------------------------------------------------------------------------------------------------------------------------------------------------------------------------------------------------------------------------------------------------------------------------------------------------------------------------------------------------------------|
| Journal:                      | <i>BMJ Open</i>                                                                                                                                                                                                                                                                                                                                                                                                                                                                                                                                                                                                                                                                                                                                                                                                                                                                                                                                                                                                                                                                                                                                                                                                                                                                                                                                                                                                                                                                                                                                                                                                                                                                                                                                                                                                                                                                                                                                                                                                                                                                                                                                                                         |
| Manuscript ID                 | bmjopen-2022-071540.R1                                                                                                                                                                                                                                                                                                                                                                                                                                                                                                                                                                                                                                                                                                                                                                                                                                                                                                                                                                                                                                                                                                                                                                                                                                                                                                                                                                                                                                                                                                                                                                                                                                                                                                                                                                                                                                                                                                                                                                                                                                                                                                                                                                  |
| Article Type:                 | Protocol                                                                                                                                                                                                                                                                                                                                                                                                                                                                                                                                                                                                                                                                                                                                                                                                                                                                                                                                                                                                                                                                                                                                                                                                                                                                                                                                                                                                                                                                                                                                                                                                                                                                                                                                                                                                                                                                                                                                                                                                                                                                                                                                                                                |
| Date Submitted by the Author: | 05-Jul-2023                                                                                                                                                                                                                                                                                                                                                                                                                                                                                                                                                                                                                                                                                                                                                                                                                                                                                                                                                                                                                                                                                                                                                                                                                                                                                                                                                                                                                                                                                                                                                                                                                                                                                                                                                                                                                                                                                                                                                                                                                                                                                                                                                                             |
| Complete List of Authors:     | <p>Minja, Neema W.; University of Washington, Department of Global Health; Kilimanjaro Clinical Research Institute (KCRI)</p> <p>Pulle, Jafesi; Uganda Heart Institute Ltd, Research</p> <p>Rwebembara, Joselyn; Uganda Heart Institute Ltd, Department of Adult Cardiology</p> <p>de Loizaga , Sarah R. ; Cincinnati Children's Hospital Medical Center, The Heart Institute</p> <p>Fall, Ndate; Cincinnati Children's Hospital Medical Center, The Heart Institute</p> <p>Ollberding, Nicholas; Cincinnati Children's Hospital Medical Center, Division of Biostatistics and Epidemiology; University of Cincinnati College of Medicine, Department of Pediatrics,</p> <p>Abrams, Jessica; University of Cape Town, Department of Pediatrics and Child Health; Reach</p> <p>Atala, Jenifer; Uganda Heart Institute Ltd</p> <p>Kamarembo, Jenipher; Uganda Heart Institute Ltd</p> <p>Oyella, Linda; Uganda Heart Institute Ltd</p> <p>Odong, Francis; Uganda Heart Institute Ltd</p> <p>Nalubwama, Haddy; Makerere University</p> <p>Nakagaayi, Doreen; Uganda Heart Institute Ltd, Department of Adult Cardiology; Cincinnati Children's Hospital Medical Center, The Heart Institute</p> <p>Sarnacki, Rachel; Children's National Medical Center, Cardiology</p> <p>Su, Yanfang; University of Washington, Department of Global Health</p> <p>Dexheimer, Judith W.; Cincinnati Children's Hospital Medical Center, Department of Biomedical Informatics; University of Cincinnati College of Medicine</p> <p>Sable, Craig ; Children's National Hospital, Cardiology</p> <p>Longenecker, Chris T.; University of Washington, Department of Global Health &amp; Division of Cardiology</p> <p>Danforth, Kristen ; University of Washington, Department of Global Health</p> <p>Okello, Emmy; Uganda Heart Institute Ltd, Department of Adult Cardiology; Makerere University College of Health Sciences, Department of Medicine, College of Health Science,</p> <p>Beaton, Andrea; Cincinnati Children's Hospital Medical Center, Cardiology</p> <p>Watkins, DA; University of Washington, Department of Global Health; University of Washington, Department of general medicine</p> |

1  
2  
3  
4  
5  
6  
7  
8  
9  
10  
11  
12  
13  
14  
15  
16  
17  
18  
19  
20  
21  
22  
23  
24  
25  
26  
27  
28  
29  
30  
31  
32  
33  
34  
35  
36  
37  
38  
39  
40  
41  
42  
43  
44  
45  
46  
47  
48  
49  
50  
51  
52  
53  
54  
55  
56  
57  
58  
59  
60

|                                   |                                                                                                                                                          |
|-----------------------------------|----------------------------------------------------------------------------------------------------------------------------------------------------------|
| <b>Primary Subject Heading:</b>   | Cardiovascular medicine                                                                                                                                  |
| <b>Secondary Subject Heading:</b> | General practice / Family practice                                                                                                                       |
| <b>Keywords:</b>                  | Valvular heart disease < CARDIOLOGY, Adult cardiology < CARDIOLOGY, Health informatics < BIOTECHNOLOGY & BIOINFORMATICS, REGISTRIES, PREVENTIVE MEDICINE |
|                                   |                                                                                                                                                          |

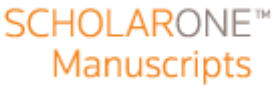

## Evaluating the implementation of a dynamic digital application to enable community-based decentralization of rheumatic heart disease case management in Uganda: A hybrid type III effectiveness-implementation study protocol

Neema W. Minja<sup>1,2,3\*</sup>, Jafesi Pulle<sup>2</sup>, Joselyn Rwebembera<sup>4</sup>, Sarah R. de Loizaga<sup>5</sup>, Ndate Fall<sup>5</sup>, Nicholas J. Ollberding<sup>6,7</sup>, Jessica Abrams<sup>8,9</sup>, Jenifer Atala<sup>2</sup>, Jenipher Kamarembo<sup>2</sup>, Linda Mary<sup>2</sup>, Francis Odong<sup>2</sup>, Haddy Nalubwama<sup>10</sup>, Doreen Nakagaayi<sup>4,5</sup>, Rachel Sarnacki<sup>11</sup>, Yanfang Su<sup>1</sup>, Judith W. Dexheimer<sup>13,14,15</sup>, Craig Sable<sup>16</sup>, Chris T. Longenecker<sup>17</sup>, Kristen Danforth<sup>1</sup>, Emmy Okello<sup>4,17</sup>, Andrea Beaton<sup>5</sup>, David Watkins<sup>1,18</sup>

<sup>1</sup>Department of Global Health, University of Washington, Seattle, WA 98195, USA, <sup>2</sup>Uganda Heart institute, Mulago Hospital, Kampala 37392, Uganda, <sup>3</sup>Kilimanjaro Clinical Research Institute (KCRI), Moshi, Tanzania, <sup>4</sup>Department of Cardiology, Uganda Heart institute, Mulago Hospital, Kampala 37392, Uganda, <sup>5</sup>The Heart Institute, Cincinnati Children's Hospital Medical Center, Cincinnati, USA, <sup>6</sup>Division of Biostatistics and Epidemiology, Cincinnati Children's Hospital Medical Centre, Cincinnati, Ohio, USA, <sup>7</sup>Department of Pediatrics, University of Cincinnati College of Medicine, Cincinnati, Ohio, USA, <sup>8</sup>Division of Pediatric Cardiology, Department of Pediatrics and Child Health, University of Cape Town, Cape Town, South Africa; <sup>9</sup>Reach, Cape Town, South Africa, <sup>10</sup>Makerere University, Kampala, Uganda, <sup>11</sup>Children's National Medical Center, Washington DC, USA, <sup>13</sup>Department of Biomedical Informatics, Cincinnati Children's Hospital Medical Center, Cincinnati, USA, <sup>14</sup>University of Cincinnati School of Medicine, Cincinnati, USA, <sup>15</sup>Division of Emergency Medicine, Cincinnati Children's Hospital Medical Center, Cincinnati, USA, <sup>16</sup>Children's National Hospital, Washington D.C., USA, <sup>17</sup>Department of Global Health & Division of Cardiology, University of Washington, Seattle, USA, <sup>18</sup>Department of Medicine, College of Health Science, Makerere University, Uganda,

<sup>18</sup>Department of general medicine, University of Washington, Seattle, WA 98195, USA

\*Corresponding author: E-mail: [nminja@uw.edu](mailto:nminja@uw.edu)

### ABSTRACT:

**Introduction:** Rheumatic heart disease (RHD) affects over 39 million people worldwide, the majority in low- and middle- income countries. Secondary antibiotic prophylaxis (SAP), given every 3 to 4 weeks can improve outcomes, provided more than 80% of doses are received. Poor adherence is strongly correlated with the distance travelled to receive prophylaxis. Decentralizing RHD care has the potential to bridge these gaps and at least maintain or potentially increase RHD prophylaxis uptake. A package of implementation strategies was developed with the aim of reducing barriers to optimum SAP uptake.

**Methods and analysis:** A hybrid implementation-effectiveness study type III was designed to evaluate the effectiveness of a package of implementation strategies including a digital, cloud-based application to support decentralized RHD care, integrated into the public healthcare system in Uganda. Our overarching hypothesis is that secondary prophylaxis adherence can be maintained or improved via a decentralization strategy, compared to the centralized delivery strategy, by increasing retention in care. To evaluate this, eligible RHD patients irrespective of their age enrolled at Lira and Gulu hospital registry sites will be consented for decentralized care at their nearest participating health centre. We estimated a sample size of 150-200 registrants. The primary outcome will be adherence to secondary prophylaxis whilst detailed implementation measures will be collected to understand barriers and facilitators to decentralization, digital application tool adoption, and ultimately its use and scale-up in the public healthcare system.

**Ethics and dissemination:** This study was approved by the Institutional Review Board (IRB) at Cincinnati Children's Hospital Medical Center (IRB 2021-0160), and Makerere University School of Medicine Research Ethics Committee (Mak-SOMREC- 2021-61). Participation will be voluntary and informed consent or assent (>8 but <18) will be obtained prior to participation. At completion, study findings will be communicated to the public, key stakeholders and submitted for publication.

**Keywords:** Rheumatic Heart disease, BPG, Decentralization, Registries, Technology, Implementation science, Primary health centre

### Strengths and limitations of this study

- The study methodology outlines an evaluation approach for decentralized care programs for Rheumatic Heart disease, which has not been described before, integrating an electronic RHD registry for primary health care
- A range of implementation strategies are incorporated within a robust and iterative methodology that address known barriers to care
- Two different geographical settings are used for the implementation in Uganda, increasing the external validity
- The study is limited by the pre/post design and lacks an external control group
- The small number of participating facilities and patients will limit understanding the effectiveness of the intervention.

### INTRODUCTION

Rheumatic Heart Disease (RHD) remains the most commonly acquired heart disease in people under 25 years of age (1). The median age at death, 28 years in Sub-Saharan Africa (2), translates into a large toll on the economically-productive age groups, resulting in rippled economic effects for already impoverished families (3). Furthermore, RHD is a disease associated with marked disparities, disproportionately affecting socioeconomically disadvantaged populations including children, women, poverty-stricken and marginalized minority ethnic groups (4–8). It is estimated that there are 39 million people with RHD globally, surpassing the number of people currently living with HIV/AIDS (4,9). Unlike HIV, which has seen sustained efforts towards control, RHD was not a priority on the international health development agenda for many years. Most low-income countries have no RHD programs in place, resulting in a gross underestimation of the prevalent cases and poor RHD knowledge among the healthcare workforce.

The first global resolution on rheumatic fever and RHD was adopted at the 71<sup>st</sup> World Health Assembly in 2018. Outlined among the broad clauses of this resolution is for countries to invest in community and primary healthcare workers as well as access to medicines for the prevention and control of RHD (10,11). Secondary antibiotic prophylaxis (SAP), in the form of monthly intramuscular Benzathine penicillin G (BPG), has been shown to be effective in preventing recurrent streptococcal infections - 'strep throat', acute rheumatic fever (ARF), and progression of RHD (12–14). These benefits are contingent on achieving an optimum adherence, at least  $\geq 80\%$  coverage of prescribed injections over many years of treatment (14,15). However, adherence is often suboptimal, leaving patients vulnerable to recurrent ARF and disease progression, a significant risk factor for death within eight months of diagnosis (16). Several factors have been shown to impact optimal BPG adherence – including drug supply shortages, distances travelled to the health facilities, and associated costs of attending hospitals for monthly injections (17–19).

Previous research in Uganda identified the distance people currently have to travel to receive routine monthly SAP is a major barrier, and a strong predictor of retention (20,21). This is due in part to the absent district-level RHD programs in Uganda, where primary health care (PHC) nurses do not

1  
2  
3 have practical skills and tools to efficiently manage BPG delivery for RHD patients, despite the fact  
4 that this is well within their scope of practice. Moreover, registries have been identified as an  
5 important part of RHD control measures (22–24) and set forth as a priority by RHD experts (25). In  
6 practice, centralized registries have often taken the form of static data collection (21), and not  
7 geared to scale to the community at large. While RHD programs are not yet operational at the  
8 district level in Uganda, we have an opportunity to improve access and uptake of BPG prophylaxis  
9 for the small fraction (1-2% of estimated total cases nationally) of people who have been identified  
10 and are active in the national RHD disease registry (20). Decentralization of care to primary health  
11 facilities has been employed for other diseases, the most widespread in the region being  
12 decentralization of HIV treatment to PHC nurses, allowing for major scale-up and availability of HIV  
13 services to those in-need (26).  
14  
15

16  
17 Demonstrating that a new approach to RHD care is effective and implementable is important for  
18 scaling RHD services more broadly. The capacity within the current centralized approach is  
19 insufficient to serve the approximately 200 - 400 thousand persons estimated to be living with RHD  
20 in Uganda. Thus, there is a need to bring RHD care into the digital age, where technology-enhanced  
21 dynamic tools can be employed to improve RHD care delivery. The ADD-RHD (Active Case Detection  
22 and Decentralized Dynamic Registry to Improve the Uptake of Rheumatic Heart Disease Secondary  
23 Prevention) study was designed to address the above-mentioned challenges, including long  
24 distances to regional hospitals and the lack of a dynamic record system. The study is called “ADD-  
25 RHD” in part because the study “adds” RHD care to the list of competencies of PHC nurses in the  
26 study sites. As a major component of this study, the Active community case management tool (ACT)  
27 that was recently developed and piloted will be introduced in this setting, intended to support  
28 clinicians with technology-enhanced support tools (27).  
29  
30

### 31 **Aims and hypothesis**

32  
33 This study aims to evaluate the effectiveness of a package of implementation strategies that  
34 includes: assessment of site readiness, decentralization of service sites, a new mode of electronic  
35 record- keeping, health care worker training, iterative feedback during implementation,  
36 identification of champions and physical supply of medicines for improving SAP delivery for RHD  
37 care. We hypothesize that this package of strategies will be equivalent to or improve the current SAP  
38 adherence and related outcomes for enrollees in the decentralized study locations.  
39  
40

## 41 **METHODS AND ANALYSIS**

### 42 **Study design**

43  
44 This is a mixed methods, hybrid type III effectiveness-implementation study, that will be integrated  
45 into rural and semi-urban primary health centres. This design primarily focuses on the effectiveness  
46 of a package of implementation strategies whilst collecting secondary data on clinical outcomes (28).  
47 Decentralization of SAP delivery is postulated to at least preserve the level of adherence, whilst  
48 building capacity to scale up service delivery. The primary implementation endpoints will look at the  
49 post-implementation healthcare utilization outcomes among enrolled patients, with a particular  
50 focus on SAP adherence (defined as proportion of days covered), which is strongly associated with  
51 the clinical outcomes of recurrence of ARF and progression of disease (14). The study will determine  
52 whether adherence to SAP post-implementation is non-inferior to the current, centralized care. We  
53 estimated a total of 150 - 200 persons with RHD Lira and Gulu will be eligible for decentralization  
54 (statistical considerations below). Further, we will evaluate the acceptability, penetration, adoption,  
55 and cost of the implementation.  
56  
57  
58  
59  
60



For secondary clinical outcomes, we will explore the relationship between program and adverse cardiovascular events (recurrent ARF, new or worsening heart failure, atrial fibrillation) and mortality compared to the baseline period. Because of the relatively small number of identified people with RHD in Uganda, and the centralized nature of secondary prophylaxis delivery currently at a small number of referral hospitals, we developed a non-randomized experiment using pre/post methods to demonstrate the impact of a package of strategies on implementation outcomes as well as intermediate clinical outcomes.

## Study setting

### *Current RHD care provision – National registry at central and referral regional hospitals*

Presently, a national RHD registry, a collection of clinical data for RHD patients enrolled and known to the healthcare system in Uganda is run centrally by research staff at the Uganda Heart Institute (Kampala). Initially established in 2010, the registry subsequently expanded to include a satellite centre in Kampala (Lebowa) - and regional registry sites within 3 districts across the country (Mbarara, Gulu and Lira). The current RHD registry-based care in Uganda was initiated to capture people presenting with RHD to tertiary care and has served to establish numbers of those affected together with informing patient status. Dedicated research staff provide, coordinate and monitor routine BPG prophylaxis and RHD-related patient care in the country. The RHD registry is hosted electronically on REDCap, and involves both direct data entry and transfer of paper records into REDCap (29,30). However, the majority of records are paper-based and limited to the centres, which has proven to be outdated and ineffective (Table 1).

### *The new approach – ADD-RHD*

Existing RHD registrants based in Lira and Gulu districts will have their monthly SAP visits decentralized from the current research-nurse led regional hospitals to outpatient settings of selected PHCs staffed by ministry of health nurses (Table 1). In this study, decentralization is defined as the change of service sites for delivery of SAP for RHD registry patients, from current regional hospitals to district level PHC facilities. As part of the ADD-RHD package, the ACT application (see below) will be introduced.

**Table 1.** Comparison of current and proposed SAP delivery approaches

|                                 | <b>Current Approach – National RHD Registry</b>                                                                                                              | <b>Proposed approach – Decentralized RHD Registry at district level health facilities</b>                                                                                                 |
|---------------------------------|--------------------------------------------------------------------------------------------------------------------------------------------------------------|-------------------------------------------------------------------------------------------------------------------------------------------------------------------------------------------|
| <b>Location</b>                 | Limited to central and regional referral centres                                                                                                             | Expansion to Health centres III/IV (Lira and Gulu districts)                                                                                                                              |
| <b>Staff</b>                    | Dedicated research staff regionally                                                                                                                          | This approach will incorporate existing MOH staff at HCIII/IV at district and regional hospitals, as well as administrators and different stakeholders from Ministerial representatives   |
| <b>Patient records and data</b> | REDCap/paper-based clinical records <ul style="list-style-type: none"> <li>• Web-based electronic database largely supporting research activities</li> </ul> | ACT application <ul style="list-style-type: none"> <li>• Keeps track of BPG injections</li> <li>• Automatic adherence calculation</li> <li>• Intended for direct entry by HCWs</li> </ul> |

|                                                                                                                                                                                                             |                                                                                                                                                                                              |                                                                                                                                                                                                                                                                                                                                                                                                                                                                                                                            |
|-------------------------------------------------------------------------------------------------------------------------------------------------------------------------------------------------------------|----------------------------------------------------------------------------------------------------------------------------------------------------------------------------------------------|----------------------------------------------------------------------------------------------------------------------------------------------------------------------------------------------------------------------------------------------------------------------------------------------------------------------------------------------------------------------------------------------------------------------------------------------------------------------------------------------------------------------------|
|                                                                                                                                                                                                             | <ul style="list-style-type: none"> <li>• A mix of direct entry and transfer of paper records have been used.</li> <li>• Not scalable; not enabled to support clinical management.</li> </ul> | <ul style="list-style-type: none"> <li>• Managing patient features categorized for ‘due’ and ‘missed’ injections</li> <li>• Iterative – patient reminder integration and tracking; clinician/specialist/MOH representative communication features</li> <li>• Quality metrics - Allows easily generated quality reports for examining overall adherence, referrals for procedures and the ability to compare across facilities and regions. Potentially scalable nationwide for RHD and other chronic illnesses.</li> </ul> |
| <p>SAP, Secondary Antibiotic Prophylaxis; RHD, Rheumatic Heart Disease; HC III/IV, Health Centre III/IV; MOH, Ministry of Health; ACT – Active Community Case Management Tool; HCW – Health Care Worker</p> |                                                                                                                                                                                              |                                                                                                                                                                                                                                                                                                                                                                                                                                                                                                                            |

**The Intervention**

The evidenced-based practice, secondary antibiotic prophylaxis, has been proven to be effective in reducing the recurrence of strep throat and acute rheumatic fever, the cascade of events that can progress to RHD (14,15,31). In addition to reducing the progression of RHD, there is evidence that SAP can also induce the regression of clinical RHD (32). Unless contraindicated, BPG is the gold standard and most widely used for RHD secondary prevention (14).

**Preparation for decentralization**

In preparation for the study, facility visits, engagement of local and district health officers and consideration of the existing registry were done in order to inform important aspects of the implementation strategy.

Existing RHD registrants were mapped by residence, and consequently, four level 3 and 4 health centres (HCIII/IV) were chosen in each district based on diversity of location (city and rural parts of the districts) and RHD registrant geographical density (Figure 1). This was done in coordination with the local government, involving the District Health Administrator. In Uganda, rural and semi-urban areas are served by primary care health facilities with designated levels 1 – 4, where level 1 is the lowest basic dispensary and 4 with more services such as maternity care.

Initial collection of 12 – 18 months of intensive baseline data of existing RHD registry patients will be done at the Lira and Gulu regional hospitals, where RHD patient care is currently based. Where necessary, patients will be contacted by phone for confirmation and completeness of information in order to determine baseline BPG adherence and retention data prior to decentralization. This data will be collected on a quarterly basis for important primary and secondary metrics defined.

Decentralization will be a phased process starting with two of the four clinics in Lira district, followed by the remaining two, with an approximate four-week gap in-between. Thereafter, this will be replicated in Gulu after a period of four – six months to allow incorporation of planned formative feedback from decentralization in the Lira district (Figure 2).

In this study, a package of implementation strategies (Table 2) will be employed to support a decentralized SAP delivery strategy to HC III/IV. This will be centered around the introduction of the ACT application further elaborated below.

**Table 2.** ADD-RHD Implementation strategies mapped according to Expert Recommendations for Implementing Change (ERIC) discreet implementation strategies (33)

| Strategy                                                           | Details                                                                                                                                                                                                                                                                                                                                                                                                                              |
|--------------------------------------------------------------------|--------------------------------------------------------------------------------------------------------------------------------------------------------------------------------------------------------------------------------------------------------------------------------------------------------------------------------------------------------------------------------------------------------------------------------------|
| Assess for readiness and identify barriers and facilitators        | Assessment for readiness will be done through facility visits, surveys, and engagement of local and district health officers (DHO). Patient and provider interviews will identify barriers and facilitators to decentralization. Key stakeholder and community engagement on decentralization logistics will serve to establish key components of the process.                                                                       |
| Change of service sites (decentralization)                         | Four health facilities were identified based on patient clusters and distances from their residences primarily geared at increasing access and reducing distances travelled.                                                                                                                                                                                                                                                         |
| Training Health Care workers (HCWs)/ develop educational materials | HCW training was planned to include the development of education materials on RHD clinical knowledge, BPG preparation and injection skills, penicillin adverse events recognition and first aid management. A detailed description is provided below.                                                                                                                                                                                |
| Change record systems                                              | ACT application was specifically developed as a clinical tool for HCWs through stakeholder engagement and piloting (27). It encompasses in-built tools to enhance patient engagement, including clinicians' monitoring of adherence and quality metrics for monitoring supply stocks. This will replace the current regional registry. A detailed description is provided below.                                                     |
| Purposefully re-examine the implementation                         | We built in milestones to re-examine implementation activities, identify challenges, and provide feedback and support to health facilities in order to continuously improve the quality of care. This includes looking at the use of ACT for patient management, identifying challenges and giving feedback to healthcare workers in health centres                                                                                  |
| Identify and prepare champions                                     | Initial assessment for readiness informed the need for local champions at each health centre, selected to drive the implementation by providing support and driving quality improvement activities such as updating stock and supplies data for quality metrics on the ACT application.                                                                                                                                              |
| Physical supply of medicines*                                      | Although historically used to treat other conditions, such as syphilis, its consistent availability is variable in public facilities in Uganda. Hence, through stakeholder and local engagement, temporary BPG supply was found to be an essential initial component to the success of the intervention at a few facilities. This marked an iterative adaptation in light of short-term regulatory constraints. For some facilities, |

increasing BPG supply through the government system was motivated by history of use, and hence a gap in supply was inevitable during the initial post-decentralization period. Covering this gap was an important aspect to implementation.

\*Not a specific ERIC implementation strategy. DHO, District Health Officer; HCW, Health Care Worker; RHD, Rheumatic Heart Disease; ACT, Active Community Case Management Tool; BPG, Benzathine Penicillin G

### ACT application

The ACT application is a digital tool-kit designed to build on REDCap, the current research database. The application incorporates several important features for RHD control including; 1) Availability of a simplified, interactive record of patients' administered BPG injections with automatic adherence calculations and relevant patient details, investigations and management; 2) A 'manage my patient' feature that allows clinicians to track patient status by due or missed visits that integrates with a clinician-facing reminder function, and 3) Monitoring of medicinal and supply stocks at facility and central levels. ACT is a small-scale medical record application built with the overarching goal of its integration for RHD care nationally and internationally, with potential to be replicated for use in other chronic disease management. Table 1 summarizes the current and new approach with regards to ACT as a novel electronic tool. The use of technology enhanced tools in this setting will require some additional efforts. This was informed by the pilot training where many HCWs were not conversant with digital tools and apps. The feedback was then used to develop a simplified application version for HCWs (27). Secondly, an offline feature was added to ACT to ensure interruptions are minimized given the instability with internet connectivity in this setting. Further, initial on-going site support visits have been planned at pre-determined intervals (frequently at first and then more spaced out) and will serve to provide refresher training on RHD and ACT. Data will be collected around these and incorporated into the implementation evaluation.

### Provider education

Training of health workers from health centres will be central to this project. Whilst advocacy and awareness of RHD has been increasing due to established research efforts, a large gap remains in provider RHD competency. Recent research found that less than 25% of facilities across several Ugandan districts had received any RHD training in the past two years and only 11% and 8% HC III and IVs had any RHD guidelines (34). Further, limited RHD knowledge was a prominent theme in published health care provider interviews, who expressed a strong desire for training (34).

Currently, service provision of BPG for RHD in HC III/IV is not systematically undertaken. This informed an initial pilot training of representatives from each of the selected HCIII/IV facilities for decentralization in Lira. The pilot identified deficiencies in specific areas that were instrumental in tailoring educational materials developed for pre-decentralization training. We found variable but low RHD knowledge and experience among the HCWs. BPG is known to be a difficult injection to administer due to its nature to crystallize and presents challenges for unexperienced workers. A substantial portion of the planned training (and refresher sessions planned periodically thereafter), will focus on the practical aspects of BPG administration, as well as recognition and triage of potential BPG allergic reactions and anaphylaxis. The second set of training materials will consist of introduction to the ACT application. Additionally, a standard operating procedure (SOP) was developed, which will serve as the guideline for all decentralization procedures in health facilities in both districts.

1  
2  
3 'Champions', will be identified by the RHD research nurses based at the regional hospitals. The  
4 relationship between them and the staff at the health centres has been fostered overtime, giving  
5 them an advantage to identify overall motivated staff in different aspects of decentralization- with a  
6 particular emphasis on electronic record patient management and follow-up. Champions will be  
7 identified for each health centre in the first few months after decentralization and geared to drive  
8 the implementation and continuous support Inclusion of medical records personnel was not initially  
9 planned for. However, the pilot training revealed that these personnel are more technologically  
10 competent and including them would facilitate support at the health centres throughout the  
11 implementation".  
12  
13

### 14 **Study population and recruitment**

15  
16 All eligible RHD registrants will be approached by trained study staff. After an explanation of the  
17 study is provided, the registrants will be invited to participate in decentralization. Registrants will be  
18 presented with the option to receive their care at one of the four community HCs selected in each  
19 district that is closest to them. Participation for all participants is voluntary and informed consent or  
20 assent from a parent or guardian (for those > 8 but < 18 years) will be sought and signed before  
21 enrolment.  
22  
23

### 24 **Participant eligibility**

25  
26 **Inclusion criteria.** Eligible participants for decentralization will be all RHD registrants who live within  
27 20 km of a participating health centres.  
28  
29

30  
31 **Exclusion criteria.** Registrants will be ineligible for participation if they have severe RHD - shown to  
32 be associated with an increased risk of a vasovagal mediated sudden deterioration during or  
33 immediately after a BPG injection; caution has been issued on BPG use in this population (35).  
34 According to these recommendations, we will exclude patients with severe mitral stenosis, severe  
35 aortic regurgitation or stenosis, ventricular dysfunction (EF < 50%) or with advanced symptoms  
36 (NYHA class III/IV) (35) as ascertained by echocardiography performed within 6 months prior to  
37 decentralization.  
38

39 Registrants consenting to decentralization will have the necessary information regarding their care  
40 at participating health centres given to them during their last visit at the regional hospital. Following  
41 this, registration of health centre nurses to the ACT application will commence. Given the novelty of  
42 systematic RHD care delivery in clinics, the research team will be on-site (at the health centres) for  
43 the first week and frequently thereafter, according to a documented schedule in order to provide  
44 the necessary support during this period. This will be phased out slowly over three to six months. As  
45 one of the key implementation strategies, we purposefully planned to re-examine implementation  
46 activities- including patient flow at clinics and the use of ACT for patient management. Any  
47 challenges identified will be attended to through a feedback process between healthcare workers in  
48 health centres, the research team and study administrators.  
49  
50

### 51 **Implementation outcomes**

52  
53 For the primary implementation outcome, BPG adherence will be measured as a proxy for post-  
54 implementation healthcare utilization among registrants. The annualized proportion of persons who  
55 have  $\geq 80\%$  of days covered pre- and post-decentralization will be compared. At the individual level,  
56 adherence is calculated as the proportion of days covered over days prescribed BPG (Table 3). Data  
57 will be obtained from the ACT application and RHD REDCap registry for baseline pre-decentralization  
58  
59  
60

adherence data. Based on our hypothesis, we will be testing for non-inferiority of SAP adherence, post-implementation.

**Table 3. Key metrics collected during baseline data collection**

| Primary Metric                                                                                                             | Operational Definition                                                                                                                                                                                                                                                                                          | Collection Method                                                                                                                                    |
|----------------------------------------------------------------------------------------------------------------------------|-----------------------------------------------------------------------------------------------------------------------------------------------------------------------------------------------------------------------------------------------------------------------------------------------------------------|------------------------------------------------------------------------------------------------------------------------------------------------------|
| BPG Adherence                                                                                                              | The proportion of persons who have 80% of days covered. Each registrants' days of coverage will be calculated as:<br>Days of coverage (%) = Days with adequate BPG coverage*/Days prescribed BPG.<br>*Adequate BPG coverage defined as the prescribed interval between BPG injection (i.e. 28, 21, or 14 days). | National Registry and ACT application, based on dates of injections as compared to prescription                                                      |
| Secondary Metrics                                                                                                          | Operational Definition                                                                                                                                                                                                                                                                                          | Collection Method                                                                                                                                    |
| Retention                                                                                                                  | Defined as being seen at least twice in a 12-month period for clinical review (outside or in conjunction with BPG delivery)                                                                                                                                                                                     | National Registry and ACT application                                                                                                                |
| Composite Adverse CV events                                                                                                | Combination of new or worsening heart failure, atrial fibrillation, infective endocarditis, and/or recurrent ARF                                                                                                                                                                                                | National Registry and ACT application, supplemented as needed by patient interview                                                                   |
| RHD Mortality                                                                                                              | Death of an RHD registrant that is determined to be the direct or indirect result of RHD.                                                                                                                                                                                                                       | Multimodality, direct report from family or hospital/clinic if death was witnessed by medical staff                                                  |
| BPG Stockouts                                                                                                              | Number of days with no BPG or BPG-related supplies (needles, syringes, dilutant, lidocaine, etc.) to be tracked individually, and # of days at <20% supply (based on anticipated number of RHD registrants assigned to that clinical location)                                                                  | ONLY tracked during decentralized care, through both stock inventory by our research staff (monthly surveillance) and reports on the ACT application |
| BPG, Benzathine Penicillin G; ACT, Active Community Case Management Tool; CV, cardiovascular; RHD, Rheumatic Heart Disease |                                                                                                                                                                                                                                                                                                                 |                                                                                                                                                      |

The taxonomy of implementation constructs proposed by Proctor et al., (36) will be used to guide the data collection, levels of analysis, and measurement of implementation outcomes, with particular emphasis on acceptability, adoption, penetration, and implementation cost.

Pre-implementation, formative research was planned and undertaken among stakeholders in the two districts to inform the design and logistical aspects of the project. At the start of the study, facility surveys will collect monthly data on clinic staff numbers and roles, availability of drugs (which will inform drug-stock outs) and consumables - with particular emphasis on RHD care-relevant supplies. We will evaluate the implementation outcomes of acceptability, adoption and penetration by conducting a concurrent mixed methods evaluation of the ADD-RHD program (Table 4). Pre/post decentralization patient and provider qualitative interviews using semi-structured questionnaires have been planned within a month prior to decentralization to get in-depths perspectives from potential participants, including foreseen barriers to program roll-out. This was intended to be



1  
2  
3 formative, and no formal framework will be used. However, six key areas of interest pertaining to  
4 decentralization were used to develop *a priori* data extraction template. A matrix-based rapid  
5 qualitative analysis will be done and themes and sub-themes generated will enable the  
6 incorporation of findings in real-time to optimize the decentralization of RHD care. This was planned  
7 as part of implementation iteration (together with a staggered roll-out in Lira and then Gulu district),  
8 for quality improvement. Further, database queries, anecdotes, user inquiries and field diaries from  
9 support staff will be kept to inform determinants of implementation. In particular, we will collect  
10 data on patient use of health centres and return rates (if any) to the regional hospital that will  
11 inform acceptability (Table 4). A sub-study will evaluate costs, as an important implementation  
12 outcome. High out of pocket costs have been previously documented to be associated with the  
13 current centralized care (3). It is postulated that a decentralized model will result in reduction of out  
14 of pocket expenditures. To enable this evaluation, pre-planned patient surveys, time and motion  
15 studies (37) and facility cost data will be used in an embedded economic evaluation and reported  
16 separately from the main study. Furthermore, time and motion studies will be incorporated to  
17 evaluate any disruptions to care and potential distribution of valuable manpower resources which  
18 will be valuable for planning and scaling the intervention if it were successful.  
19  
20  
21  
22  
23  
24  
25  
26  
27  
28  
29  
30  
31  
32  
33  
34  
35  
36  
37  
38  
39  
40  
41  
42  
43  
44  
45  
46  
47  
48  
49  
50  
51  
52  
53  
54  
55  
56  
57  
58  
59  
60



**Table 4.** Data sources for the evaluation of implementation outcomes

|               | <b>Definition</b> (Proctor et al, 2011) (36)                                                                                                                                                        | <b>Provider Level</b>                                                                                                                      | <b>Patient Level</b>                                                                                      | <b>Facility Level</b>                                                                                                                                 | <b>ACT Application Audits</b>                                                                                                                                            | <b>Record Audit at RRH Visits</b>                                                                            |
|---------------|-----------------------------------------------------------------------------------------------------------------------------------------------------------------------------------------------------|--------------------------------------------------------------------------------------------------------------------------------------------|-----------------------------------------------------------------------------------------------------------|-------------------------------------------------------------------------------------------------------------------------------------------------------|--------------------------------------------------------------------------------------------------------------------------------------------------------------------------|--------------------------------------------------------------------------------------------------------------|
| Acceptability | Relates to perceptions on suitability and agreeability of the innovation and the satisfaction among stakeholders. Analysis will be at the patient and provider level.                               | Provider pre-/post-decentralization interviews                                                                                             | Patient pre-/post-decentralization interviews<br>Coded under acceptability and Health setting preferences | Administrator interview                                                                                                                               | ACT usage audit/data queries<br>Documented ACT application changes                                                                                                       | RRH injection record audits;<br>Self-decentralization rates and rates of return to RRH post-decentralization |
| Adoption      | Defined as the intention to take up an innovation; also quoted as “uptake” (Proctor et al, 2011, p.69)(36). In this study adoption will be analyzed at the provider level at the health facilities. | Provider pre-/post-decentralization interviews.<br>Observation<br>Time & Motion study                                                      | N/A                                                                                                       | Monthly Health facility survey - organization & appropriateness of RHD medicinal and supplies order based on need.<br><br>Direct observation          | ACT usage audit;<br>-Trends of use by HC nurses<br>-Completeness of BPG injections<br>-Use of additional features (Reminder & Update of stock alerts)                    | Examination of entered data on BPG card versus ACT application                                               |
| Penetration   | Refers to the absorption or incorporation of the practice into the service setting and looks at the integration of the innovation in question. The level of                                         | Provider pre-/post-decentralization interviews.<br>Attendance to RHD cases. Numbers of providers trained versus numbers delivering service | N/A                                                                                                       | Monthly Health facility survey - Improvements in medicinal (BPG) and supply shortages<br>Direct observation<br><br>Regular attendance of RHD patients | Query-generation rates on ACT application<br>Use of paper records for RHD care<br>ACT usage by HC nurses – completion of information and other usage parameters overtime | Reduction in BPG visits to RRH services for decentralized registrants                                        |

1  
2  
3  
4  
5  
6  
7  
8  
9  
10  
11  
12  
13  
14  
15  
16  
17  
18  
19  
20  
21  
22  
23  
24  
25  
26  
27  
28  
29  
30  
31  
32  
33  
34  
35  
36  
37  
38  
39  
40  
41  
42  
43  
44  
45  
46

|                                                                                                |                                          |  |  |  |                                                                   |  |
|------------------------------------------------------------------------------------------------|------------------------------------------|--|--|--|-------------------------------------------------------------------|--|
|                                                                                                | analysis is at the health facility level |  |  |  | Rates of re-education for HC nurses on deficient areas identified |  |
| RRH, Regional referral hospital; ACT, Active community case management tool; HC, Health Centre |                                          |  |  |  |                                                                   |  |

For peer review only

## Secondary clinical outcomes

Information on secondary clinical outcomes will be reported (Table 3). We will assess the non-inferiority of the decentralized registry on rates of retention at two years post implementation (Table 3). Further, a composite of adverse cardiovascular events, including a combination of new or worsening heart failure, recurrent ARF, atrial fibrillation, infective endocarditis and mortality will be documented during decentralization and records extracted for baseline period rates. In an exploratory analysis, using continuous measures of adherence, we will compare event rates among more- and less-adherent participants to validate the purported dose-response relationship between SAP and ARF, clinical progression of RHD in this context.

## Statistical considerations

The primary outcome of the study is to determine whether adherence after decentralization is non-inferior to the baseline adherence recorded for national RHD registry. We propose a one-sided exact binomial test at  $\alpha = 0.025$  of the null hypothesis that the proportion of adherent patients during the intervention period is less than baseline by more than 10%. Based on previous experience with this patient population, we expect approximately 150 - 200 persons with RHD will contribute data on adherence during the baseline and intervention periods in Lira and Gulu. We also approximate 75% of these patients will receive 80% of BPG injections. Table 4 provides the expected power ( $1 - \beta$ ) for plausible values of the sample size ( $n$ ), baseline percent adherent (BPA), and non-inferiority margin. Based on these assumptions, for  $\alpha = 0.025$  (one-sided) taking a total of between 150 - 200 participants will provide between 72 - 86% power to reject the null hypothesis of inferiority when the baseline percent adherent is 75% and the NIM is -10%. Thus, we expect to be at least moderately powered to reject the null hypothesis of inferiority at the proposed non-inferiority margin.

## Patient and Public Involvement

Within the current set-up of RHD care in Uganda, patients attending the main hospital in both districts expressed the problems they faced with long distances travelled from residences (often in rural areas) to come for monthly RHD care at the main hospital. These patients' experiences were incorporated into the design and informed the implementation strategies of this study. Furthermore, stakeholder and community engagement, local and district health administrators were consulted for input on the logistics of the study, including the use of ACT software to enhance decentralized RHD care to the rural and semi-urban health facilities.

Results of the study will be made available to participants and the community through the health facilities and the main hospital in both districts where RHD follow-ups are done.

## DISCUSSION

Like many chronic diseases, the successful prevention of RHD entails optimum adherence to monthly BPG injections, the cornerstone of RHD control. Decentralization of health services has long been advocated as a means to improve health service delivery and reach (38). Successful decentralization of care to PHCs resulted in the widespread availability and accessibility of HIV treatments in similar settings, playing a key role in HIV program successes (39). Disease registries have been previously advocated in the early 2000s by organizations such as World Health Federation and RHD Action (40), which outlined minimum standards and guidance for RHD registries. However, these efforts have seen variable country uptake, often characterized by centralized registries, fragile paper records and limitations in quality assurance and continuous monitoring. To date, no modern version of a

1  
2  
3 decentralized national RHD registry currently exists in LMICs. The ACT application, one of the  
4 packages of implementation strategies, was designed to mitigate the static nature of registries and  
5 further aid health workers in managing RHD secondary prevention. If successful, this will modernize  
6 how we approach RHD secondary prevention in Uganda and other similar settings, where RHD is  
7 prevalent. Based on this, and through long-standing partnerships encompassing local, regional and  
8 district key stakeholder engagement, we established the feasibility and suitability of ADD-RHD.  
9

10  
11 ACT is a novel technology-enabled dynamic application that integrates features to empower health  
12 workers at all levels of care with supportive tools to track, monitor and better engage RHD patients.  
13 In addition, the application will facilitate health centre communication channels to responsible  
14 bodies, such as relevant persons in medical supplies and the ministry of health, an important aspect  
15 to ensure availability of medicines, supplies and quality improvement. Electronic medical records are  
16 yet to be incorporated widely in health facilities in Uganda, hence the tailored simplification for  
17 PHCs and initial support provided by the current research collaborative will be valuable and presents  
18 a potential for its absorption into future electronic medical records expansion plans (27). Ultimately,  
19 the study can be used as a model for chronic disease management by informing how we integrate  
20 these digital health systems to enhance patient care in similar settings where HCWs are not  
21 necessarily well-versed with computers or technology.  
22  
23

24 We acknowledge some limitations to this study. Firstly, the study design did not use an external  
25 control group, and had a fixed sample size, reflecting the limited cases currently identified and  
26 established in the registry from previous screening efforts. The use of fairly robust and more  
27 comprehensive mixed-methods with the additional collection of more granular data was designed to  
28 mitigate some of these limitations. Another potential limitation is around the ACT application,  
29 requiring baseline user comfort with technology and smart phones, which was not the case with  
30 some community public health workers. The pilot training informed the development of a simplified  
31 application version tailored specifically to the roles of the HCWs (27). In addition, internet  
32 connectivity is often unstable in this setting, which informed the incorporation of an offline feature  
33 function that may enhance the functionality and uptake of the application. Lastly, several other  
34 system-level factors pose potential challenges, including long waiting times, staff shortages and drug  
35 availability that are generalizable country-wide, but which may impact implementation. Securing  
36 medication by use of external resources in the initial period limits the generalizability without  
37 modifications to the health system. However, it demonstrates the values of securing supplies to  
38 make improvements and signifies more work needs to be done in this area. Despite evidence  
39 regarding SAP, most governments have not developed nor scaled-up RHD programs, limiting access  
40 to healthcare available to patients. Ultimately, through the project, there is an opportunity to re-  
41 design and equip PHCs to overcome some of these barriers to healthcare and serve as a foundation  
42 for scaling up much needed RHD services to different parts of the country.  
43  
44  
45  
46

## 47 ETHICS AND DISSEMINATION

48  
49 This study was approved by the Institutional Review Board at Cincinnati Children's Hospital Medical  
50 Center (IRB 2021-0160), and Makerere University School of Medicine Research Ethics Committee  
51 (Mak-SOMREC- 2021-61). Participation will be voluntary and informed consent or assent (>8 but  
52 <18) will be obtained and signed prior to participation. At completion, study findings will be  
53 published in peer-reviewed journals and communicated to the public and key stakeholders.  
54  
55

56 **Word count: 4182**

57  
58 **Study Status**  
59  
60

1  
2  
3 The ADD-RHD study was initially approved on 04/03/2021. Decentralization of study participants is  
4 currently being finalized in the second site and post-decentralization data collection will follow for  
5 12 months to December 2023. Data analysis is planned to start early 2024, with the full project due  
6 for completion in April 2024.  
7

## 8 **LIST OF ABBREVIATIONS**

10 **ACT:** Active Community Case Management Tool

11 **ADD-RHD:** Active Case Detection and Decentralized Dynamic Registry to Improve the Uptake of  
12 Rheumatic Heart Disease

13 **ARF:** Acute Rheumatic Fever

14 **BPG:** Benzathine Penicillin G

15 **EMR:** Electronic Medical Records

16 **HC III/IV:** Health Centre III/IV

17 **HCW:** health Care Worker

18 **LMIC:** Low- and middle Income country

19 **MOH:** Ministry of Health

20 **OOP:** Out of Pocket

21 **PHC:** Primary Health Care

22 **RHD:** Rheumatic Heart Disease

23 **SAP:** Secondary Antibiotic Prophylaxis  
24  
25  
26

## 27 **DECLARATIONS**

### 28 **Consent for publication**

29 Not applicable  
30  
31

### 32 **Data Availability Statement**

33 Data sharing is not applicable as no datasets are generated and/or analysed for this study  
34  
35

### 36 **Competing interests**

37 The authors declare that they have no competing interests  
38  
39

### 40 **Funding**

41 The ADD-RHD study was funded through the AHA SFRN Grant 20SFRN35380042.

42 Redcap registry was supported by Clinical and Translational Science Award (CTSC)  
43 UL1TR002548.  
44  
45

### 46 **Author Contributions**

47 AB, DW, EO, CL, CS, JR and KD initially conceptualized the different aspects of the study.

48 DW, KD, AB, NM, JP, JR, EO, NO, JD, SdL, RS, NF and JA contributed to the study design and

49 proposal. NM, JP, JR, NF, SdL, RS, JA, JK, DN, LM, FO, HN, YS, KD, & DW contributed to the

50 implementation aspects of the study. NM, DW, AB, KD wrote the initial draft of the protocol

51 paper. All authors reviewed, updated and approved the final protocol.  
52  
53

### 54 **Acknowledgements**

55 The authors would like to thank all the local and international stakeholders who contributed

56 to the refinement of this protocol, including the patients, staff at the central, district and

57 local health centres who volunteered their time and inputs to the logistical aspects of

58 decentralization planning. Sincere thanks to Nicholas Felicelli, Kristen Tillman, Riley  
59  
60

Morrison and other members from the design team who contributed to the ACT application build.

## REFERENCES

1. Ghamari S-H, Kangevari MA-, Moghaddam SS. Rheumatic Heart Disease Is a Neglected Disease Relative to Its Burden Worldwide : Findings From Global Burden of Disease 2019. 2022;11(e025284).
2. Zühlke L, Karthikeyan G, Engel ME, Rangarajan S, Mackie P, Cupido-Katya Mauff B, et al. Clinical Outcomes in 3343 Children and Adults with Rheumatic Heart Disease from 14 Low- and Middle-Income Countries: Two-Year Follow-Up of the Global Rheumatic Heart Disease Registry (the REMEDY Study). *Circulation*. 2016;134(19):1456–66.
3. Opara CC, Du Y, Kawakatsu Y, Atala J, Beaton AZ, Kansiiime R, et al. Household Economic Consequences of Rheumatic Heart Disease in Uganda. *Front Cardiovasc Med*. 2021;8.
4. Watkins DA, Johnson CO, Colquhoun SM, Karthikeyan G, Beaton A, Bukhman G, et al. Global, regional, & national burden of rheumatic heart disease, 1990-2015. *N Engl J Med*. 2017;377(8):713–22.
5. Okello E, Kakande B, Sebatta E, Kayima J, Kuteesa M, Mutatina B, et al. Socioeconomic and environmental risk factors among rheumatic heart disease patients in Uganda. *PLoS One*. 2012;7(8).
6. Steer AC. Historical aspects of rheumatic fever. Vol. 51, *Journal of Paediatrics and Child Health*. 2015.
7. Australian Institute of Health and Welfare (AIHW). Rheumatic heart disease and acute rheumatic fever in Australia: 1996-2012. *Cardiovasc Dis Ser*. 2013;36(CVD 60).
8. Carapetis JR, Beaton A, Cunningham MW, Guilherme L, Karthikeyan G, Mayosi BM, et al. Acute rheumatic fever and rheumatic heart disease. *Nat Rev Dis Prim*. 2016;2.
9. World Health Organization. HIV/AIDS Key Facts [Internet]. 2021. Available from: <https://www.who.int/news-room/fact-sheets/detail/hiv-aids>
10. Seventy-first World Health Assembly. Rheumatic Fever and Rheumatic Heart Disease [Internet]. Available from: [https://apps.who.int/gb/ebwha/pdf/WHA71/A71\\_R14-en.pdf](https://apps.who.int/gb/ebwha/pdf/WHA71/A71_R14-en.pdf)
11. White A. WHO Resolution on rheumatic heart disease. *Eur Heart J*. 2018;39(48).
12. Gerber MA, Baltimore RS, Eaton CB, Gewitz M, Rowley AH, Shulman ST, et al. Prevention of rheumatic fever and diagnosis and treatment of acute streptococcal pharyngitis: A scientific statement from the American Heart Association Rheumatic Fever, Endocarditis, and Kawasaki Disease Committee of the Council on Cardiovascular Disease i. *Circulation*. 2009;119(11):1541–51.
13. Rothenbühler M, O’Sullivan CJ, Stortecky S, Stefanini GG, Spitzer E, Estill J, et al. Active surveillance for rheumatic heart disease in endemic regions: A systematic review and meta-analysis of prevalence among children and adolescents. *Lancet Glob Heal* [Internet]. 2014;2(12):e717–26. Available from: [http://dx.doi.org/10.1016/S2214-109X\(14\)70310-9](http://dx.doi.org/10.1016/S2214-109X(14)70310-9)
14. Manyemba J, Mayosi BM. Penicillin for secondary prevention of rheumatic fever. *Cochrane Database Syst Rev*. 2002;
15. de Dassel JL, de Klerk N, Carapetis JR, Ralph AP. How many doses make a difference? An analysis of secondary prevention of rheumatic fever and rheumatic heart disease. *J Am Heart Assoc*. 2018;7(24).
16. Zimmerman M, Kitooleko S, Okello E, Ollberding N, Sinha P, Mwambu T, et al. Clinical outcomes of children with rheumatic heart disease. *Heart* [Internet]. 2022 Apr 1;108(8):633 LP – 638. Available from: <http://heart.bmj.com/content/108/8/633.abstract>
17. Edwards JG, Barry M, Elsayed M. Health System Factors Serving as Facilitators and Barriers to Rheumatic Heart Disease Care in Sudan. *Res Sq*. 2021;
18. Kevat PM, Reeves BM, Ruben AR, Gunnarsson R. Adherence to Secondary Prophylaxis for



- 1  
2  
3 Acute Rheumatic Fever and Rheumatic Heart Disease: A Systematic Review. *Curr Cardiol Rev*.  
4 2017;13(2):155–66.
- 5 19. Huck DM, Nalubwama H, Longenecker CT, Frank SH, Okello E, Webel AR. A qualitative  
6 examination of secondary prophylaxis in rheumatic heart disease: Factors influencing  
7 adherence to secondary prophylaxis in Uganda. *Glob Heart* [Internet]. 2015;10(1):63-69.e1.  
8 Available from: <http://dx.doi.org/10.1016/j.gheart.2014.10.001>
- 9 20. Longenecker CT, Morris SR, Aliku TO, Beaton A, Costa MA, Kanya MR, et al. Rheumatic heart  
10 disease treatment cascade in Uganda. *Circ Cardiovasc Qual Outcomes*. 2017;10(11).
- 11 21. Okello E, Longenecker CT, Scheel A, Aliku T, Rwebembera J, Mirembe G, et al. Impact of  
12 regionalisation of a national rheumatic heart disease registry: The Ugandan experience. *Heart*  
13 *Asia*. 2018;10(1):1–5.
- 14 22. Remenyi B, Carapetis J, Wyber R, Taubert K, Mayosi BM. Position statement of the World  
15 Heart Federation on the prevention and control of rheumatic heart disease. *Nat Rev Cardiol*.  
16 2013;10(5):284–92.
- 17 23. Karthikeyan G, Zühlke L, Engel M, Rangarajan S, Yusuf S, Teo K, et al. Rationale and design of  
18 a Global Rheumatic Heart Disease Registry: The REMEDY study. *Am Heart J*. 2012;163(4).
- 19 24. Rémond MGW, Coyle ME, Mills JE, Maguire GP. Approaches to improving adherence to  
20 secondary prophylaxis for rheumatic fever and rheumatic heart disease: A literature review  
21 with a global perspective. Vol. 24, *Cardiology in Review*. 2016.
- 22 25. Zühlke LJ, Watkins DA, Perkins S, Wyber R, Mwangi J, Markbreiter J, et al. A Comprehensive  
23 Needs Assessment Tool for Planning RHD Control Programs in Limited Resource Settings.  
24 *Glob Heart*. 2017;12(1):25–31.
- 25 26. Kredo T, Ford N, Adeniyi FB, Garner P. Decentralising HIV treatment in lower- and middle-  
26 income countries. Vol. 2013, *Cochrane Database of Systematic Reviews*. 2013.
- 27 27. De Loizaga, Sarah R, Pulle Jafes, Rwebembera, Joselyn, Abrams, Jessica, Atala Jenifer,  
28 Chestnut Emily, Danforth Kristen, Fall Ndate, Felicelli Nicholas, Laphorn Karen, Longenecker  
29 Chris T, Minja Neema W, Moore Ryan A, Morrison Riley, Mwangi Jeremiah, Nak DJW.  
30 Development and Pilot of the Active Community Case Management Tool (ACT Platform): A  
31 dynamic tool for rheumatic heart disease case management in Uganda. *Appl Clin Inform*.  
32 2023; Submitted Manuscript ID ACI-2022-12-RA-0339.R1.
- 33 28. Curran GM, Bauer M, Mittman B, Pyne JM, Stetler C. Effectiveness-implementation hybrid  
34 designs: Combining elements of clinical effectiveness and implementation research to  
35 enhance public health impact. *Med Care*. 2012;50(3).
- 36 29. Harris PA, Taylor R, Thielke R, Payne J, Gonzalez N, Conde JG. Research electronic data  
37 capture (REDCap)-A metadata-driven methodology and workflow process for providing  
38 translational research informatics support. *J Biomed Inform*. 2009;42(2).
- 39 30. Harris PA, Taylor R, Minor BL, Elliott V, Fernandez M, O'Neal L, et al. The REDCap consortium:  
40 Building an international community of software platform partners. Vol. 95, *Journal of*  
41 *Biomedical Informatics*. 2019.
- 42 31. Watkins DA, Beaton AZ, Carapetis JR, Karthikeyan G, Mayosi BM, Wyber R, et al. Rheumatic  
43 Heart Disease Worldwide: JACC Scientific Expert Panel. *J Am Coll Cardiol*. 2018;72(12):1397–  
44 416.
- 45 32. Tompkins DG, Boxerbaum B, Liebman J. Long-term prognosis of rheumatic fever patients  
46 receiving regular intramuscular benzathine penicillin. *Circulation*. 1972;45(3).
- 47 33. Powell BJ, Waltz TJ, Chinman MJ, Damschroder LJ, Smith JL, Matthieu MM, et al. A refined  
48 compilation of implementation strategies: Results from the Expert Recommendations for  
49 Implementing Change (ERIC) project. *Implement Sci*. 2015;10(1).
- 50 34. Ndagire E, Kawakatsu Y, Nalubwama H, Atala J, Sarnacki R, Pulle J, et al. Examining the  
51 ugandan health system's readiness to deliver rheumatic heart disease-related services. *PLoS*  
52 *Negl Trop Dis* [Internet]. 2021;15(2):1–16. Available from:  
53 <http://dx.doi.org/10.1371/journal.pntd.0009164>
- 54  
55  
56  
57  
58  
59  
60

- 1
- 2
- 3
- 4 35. Sanyahumbi A, Ali S, Benjamin IJ, Karthikeyan G, Okello E, Sable CA, et al. Penicillin Reactions
- 5 in Patients With Severe Rheumatic Heart Disease: A Presidential Advisory From the American
- 6 Heart Association. *J Am Heart Assoc.* 2022;11(5):1–9.
- 7 36. Proctor E, Silmere H, Raghavan R, Hovmand P, Aarons G, Bunker A, et al. Outcomes for
- 8 implementation research: Conceptual distinctions, measurement challenges, and research
- 9 agenda. *Adm Policy Ment Heal Ment Heal Serv Res.* 2011;38(2).
- 10 37. Gold HT, McDermott C, Hoomans T, Wagner TH. Cost data in implementation science:
- 11 categories and approaches to costing. *Implement Sci.* 2022;17(1).
- 12 38. Bossert T. Analyzing the decentralization of health systems in developing countries: Decision
- 13 space, innovation and performance. *Soc Sci Med.* 1998;47(10).
- 14 39. Geng EH, Nash D, Kambugu A, Zhang Y, Braitstein P, Christopoulos KA, et al. Retention in care
- 15 among HIV-infected patients in resource-limited settings: Emerging insights and new
- 16 directions. Vol. 7, *Current HIV/AIDS Reports.* 2010.
- 17 40. RHD Action. RHD Registers [Internet]. [cited 2022 Oct 26]. Available from:
- 18 <https://rhdaction.org/control/rhd-registers>
- 19
- 20
- 21
- 22
- 23
- 24
- 25
- 26
- 27
- 28
- 29
- 30
- 31
- 32
- 33
- 34
- 35
- 36
- 37
- 38
- 39
- 40
- 41
- 42
- 43
- 44
- 45
- 46
- 47
- 48
- 49
- 50
- 51
- 52
- 53
- 54
- 55
- 56
- 57
- 58
- 59
- 60

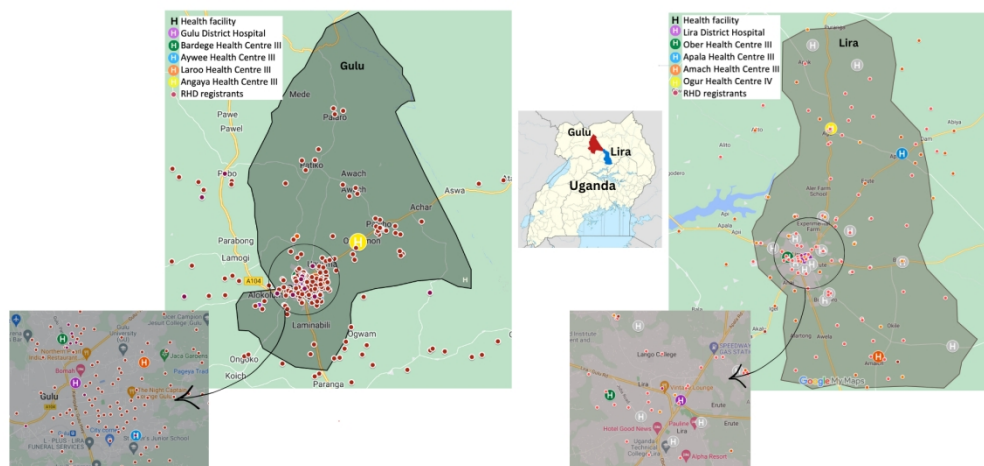

Figure 1. Geographical location of implementation sites in two districts within Uganda. The four selected health centres in Lira and Gulu are chosen according to RHD registrants' geographical density and are designated by H and colour coded.

162x91mm (300 x 300 DPI)

1  
2  
3  
4  
5  
6  
7  
8  
9  
10  
11  
12  
13  
14  
15  
16  
17  
18  
19  
20  
21  
22  
23  
24  
25  
26  
27  
28  
29  
30  
31  
32  
33  
34  
35  
36  
37  
38  
39  
40  
41  
42  
43  
44  
45  
46  
47  
48  
49  
50  
51  
52  
53  
54  
55  
56  
57  
58  
59  
60

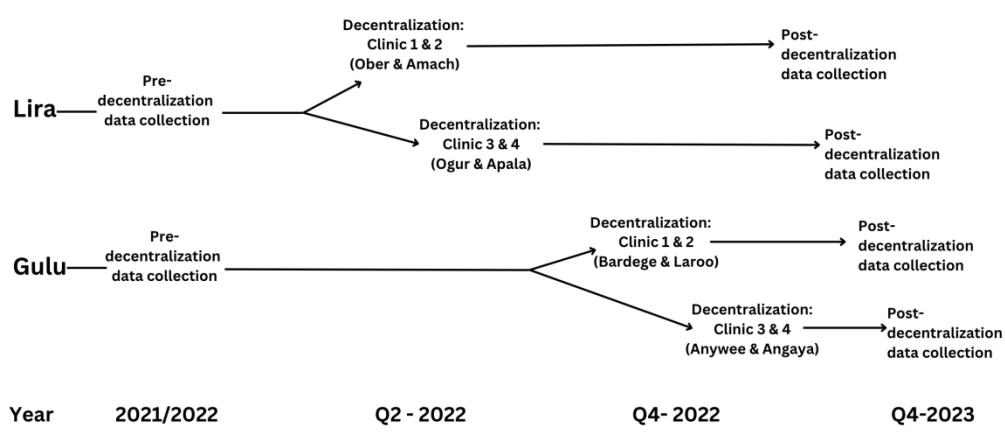

Figure 2. Sequential outline of ADD-RHD implementation plans for health centres in Lira and Gulu districts, Uganda.

201x99mm (300 x 300 DPI)



## Standards for Reporting Implementation Studies: the StaRI checklist for completion

The StaRI standard should be referenced as: Pinnock H, Barwick M, Carpenter C, Eldridge S, Grandes G, Griffiths CJ, Rycroft-Malone J, Meissner P, Murray E, Patel A, Sheikh A, Taylor SJC for the StaRI Group. Standards for Reporting Implementation Studies ([StaRI statement](#)). *BMJ* 2017;356:i6795

The detailed Explanation and Elaboration document, which provides the rationale and exemplar text for all these items is: Pinnock H, Barwick M, Carpenter C, Eldridge S, Grandes G, Griffiths C, Rycroft-Malone J, Meissner P, Murray E, Patel A, Sheikh A, Taylor S, for the StaRI group. Standards for Reporting Implementation Studies ([StaRI Explanation and Elaboration document](#)). *BMJ Open* 2017 2017;7:e013318

Notes: A key concept of the StaRI standards is the dual strands of describing, on the one hand, the implementation strategy and, on the other, the clinical, healthcare, or public health intervention that is being implemented. These strands are represented as two columns in the checklist.

The primary focus of implementation science is the implementation strategy (column 1) and the expectation is that this will always be completed.

The evidence about the impact of the intervention on the targeted population should always be considered (column 2) and either health outcomes reported or robust evidence cited to support a known beneficial effect of the intervention on the health of individuals or populations.

The StaRI standards refers to the broad range of study designs employed in implementation science. Authors should refer to other reporting standards for advice on reporting specific methodological features. Conversely, whilst all items are worthy of consideration, not all items will be applicable to, or feasible within every study.

| Checklist item            |   | Reported on page # | Implementation Strategy                                                                                                                                                                                                     | Reported on page # | Intervention                                                                                                                                                               |
|---------------------------|---|--------------------|-----------------------------------------------------------------------------------------------------------------------------------------------------------------------------------------------------------------------------|--------------------|----------------------------------------------------------------------------------------------------------------------------------------------------------------------------|
|                           |   | ↓                  | “Implementation strategy” refers to how the intervention was implemented                                                                                                                                                    | ↓                  | “Intervention” refers to the healthcare or public health intervention that is being implemented.                                                                           |
| <b>Title and abstract</b> |   |                    |                                                                                                                                                                                                                             |                    |                                                                                                                                                                            |
| Title                     | 1 | 1                  | Identification as an implementation study, and description of the methodology in the title and/or keywords                                                                                                                  |                    |                                                                                                                                                                            |
| Abstract                  | 2 | 1                  | Identification as an implementation study, including a description of the implementation strategy to be tested, the evidence-based intervention being implemented, and defining the key implementation and health outcomes. |                    |                                                                                                                                                                            |
| <b>Introduction</b>       |   |                    |                                                                                                                                                                                                                             |                    |                                                                                                                                                                            |
| Introduction              | 3 | 2                  | Description of the problem, challenge or deficiency in healthcare or public health that the intervention being implemented aims to address.                                                                                 |                    |                                                                                                                                                                            |
| Rationale                 | 4 | 3                  | The scientific background and rationale for the implementation strategy (including any underpinning theory/framework/model, how it is expected to achieve its effects and any pilot work).                                  | 3, 5               | The scientific background and rationale for the intervention being implemented (including evidence about its effectiveness and how it is expected to achieve its effects). |

|                             |    |       |                                                                                                                                                                                                  |      |                                                                                                                                                       |
|-----------------------------|----|-------|--------------------------------------------------------------------------------------------------------------------------------------------------------------------------------------------------|------|-------------------------------------------------------------------------------------------------------------------------------------------------------|
| Aims and objectives         | 5  | 3     | The aims of the study, differentiating between implementation objectives and any intervention objectives.                                                                                        |      |                                                                                                                                                       |
| <b>Methods: description</b> |    |       |                                                                                                                                                                                                  |      |                                                                                                                                                       |
| Design                      | 6  | 3     | The design and key features of the evaluation, (cross referencing to any appropriate methodology reporting standards) and any changes to study protocol, with reasons                            |      |                                                                                                                                                       |
| Context                     | 7  | 4, 5  | The context in which the intervention was implemented. (Consider social, economic, policy, healthcare, organisational barriers and facilitators that might influence implementation elsewhere).  |      |                                                                                                                                                       |
| Targeted 'sites'            | 8  | 4, 6  | The characteristics of the targeted 'site(s)' (e.g. locations/personnel/resources etc.) for implementation and any eligibility criteria.                                                         | 8    | The population targeted by the intervention and any eligibility criteria.                                                                             |
| Description                 | 9  | 6 - 8 | A description of the implementation strategy                                                                                                                                                     | 5    | A description of the intervention                                                                                                                     |
| Sub-groups                  | 10 | NA    | Any sub-groups recruited for additional research tasks, and/or nested studies are described                                                                                                      |      |                                                                                                                                                       |
| <b>Methods: evaluation</b>  |    |       |                                                                                                                                                                                                  |      |                                                                                                                                                       |
| Outcomes                    | 11 | 9-11  | Defined pre-specified primary and other outcome(s) of the implementation strategy, and how they were assessed. Document any pre-determined targets                                               | 9-11 | Defined pre-specified primary and other outcome(s) of the intervention (if assessed), and how they were assessed. Document any pre-determined targets |
| Process evaluation          | 12 | 10    | Process evaluation objectives and outcomes related to the mechanism by which the strategy is expected to work                                                                                    |      |                                                                                                                                                       |
| Economic evaluation         | 13 | *     | Methods for resource use, costs, economic outcomes and analysis for the implementation strategy                                                                                                  | *    | Methods for resource use, costs, economic outcomes and analysis for the intervention                                                                  |
| Sample size                 | 14 | 11    | Rationale for sample sizes (including sample size calculations, budgetary constraints, practical considerations, data saturation, as appropriate)                                                |      |                                                                                                                                                       |
| Analysis                    | 15 | 11    | Methods of analysis (with reasons for that choice)                                                                                                                                               |      |                                                                                                                                                       |
| Sub-group analyses          | 16 | 10    | Any a priori sub-group analyses (e.g. between different sites in a multicentre study, different clinical or demographic populations), and sub-groups recruited to specific nested research tasks |      |                                                                                                                                                       |



| <b>Results</b>        |    |         |                                                                                                                                                                                                                                           |     |                                                                                                                         |
|-----------------------|----|---------|-------------------------------------------------------------------------------------------------------------------------------------------------------------------------------------------------------------------------------------------|-----|-------------------------------------------------------------------------------------------------------------------------|
| Characteristics       | 17 | N/A     | Proportion recruited and characteristics of the recipient population for the implementation strategy                                                                                                                                      | N/A | Proportion recruited and characteristics (if appropriate) of the recipient population for the intervention              |
| Outcomes              | 18 | N/A     | Primary and other outcome(s) of the implementation strategy                                                                                                                                                                               | N/A | Primary and other outcome(s) of the Intervention (if assessed)                                                          |
| Process outcomes      | 19 | N/A     | Process data related to the implementation strategy mapped to the mechanism by which the strategy is expected to work                                                                                                                     |     |                                                                                                                         |
| Economic evaluation   | 20 | N/A     | Resource use, costs, economic outcomes and analysis for the implementation strategy                                                                                                                                                       | N/A | Resource use, costs, economic outcomes and analysis for the intervention                                                |
| Sub-group analyses    | 21 | N/A     | Representativeness and outcomes of subgroups including those recruited to specific research tasks                                                                                                                                         |     |                                                                                                                         |
| Fidelity/adaptation   | 22 | N/A     | Fidelity to implementation strategy as planned and adaptation to suit context and preferences                                                                                                                                             | N/A | Fidelity to delivering the core components of intervention (where measured)                                             |
| Contextual changes    | 23 | N/A     | Contextual changes (if any) which may have affected outcomes                                                                                                                                                                              |     |                                                                                                                         |
| Harms                 | 24 | N/A     | All important harms or unintended effects in each group                                                                                                                                                                                   |     |                                                                                                                         |
| <b>Discussion</b>     |    |         |                                                                                                                                                                                                                                           |     |                                                                                                                         |
| Structured discussion | 25 | 12      | Summary of findings, strengths and limitations, comparisons with other studies, conclusions and implications                                                                                                                              |     |                                                                                                                         |
| Implications          | 26 | 12      | Discussion of policy, practice and/or research implications of the implementation strategy (specifically including scalability)                                                                                                           | 12  | Discussion of policy, practice and/or research implications of the intervention (specifically including sustainability) |
| <b>General</b>        |    |         |                                                                                                                                                                                                                                           |     |                                                                                                                         |
| Statements            | 27 | 13 - 14 | Include statement(s) on regulatory approvals (including, as appropriate, ethical approval, confidential use of routine data, governance approval), trial/study registration (availability of protocol), funding and conflicts of interest |     |                                                                                                                         |

# BMJ Open

## Evaluating the implementation of a dynamic digital application to enable community-based decentralisation of rheumatic heart disease case management in Uganda: protocol for a hybrid type III effectiveness-implementation study

|                               |                                                                                                                                                                                                                                                                                                                                                                                                                                                                                                                                                                                                                                                                                                                                                                                                                                                                                                                                                                                                                                                                                                                                                                                                                                                                                                                                                                                                                                                                                                                                                                                                                                                                                                                                                                                                                                                                                                                                                                                                                                                                                      |
|-------------------------------|--------------------------------------------------------------------------------------------------------------------------------------------------------------------------------------------------------------------------------------------------------------------------------------------------------------------------------------------------------------------------------------------------------------------------------------------------------------------------------------------------------------------------------------------------------------------------------------------------------------------------------------------------------------------------------------------------------------------------------------------------------------------------------------------------------------------------------------------------------------------------------------------------------------------------------------------------------------------------------------------------------------------------------------------------------------------------------------------------------------------------------------------------------------------------------------------------------------------------------------------------------------------------------------------------------------------------------------------------------------------------------------------------------------------------------------------------------------------------------------------------------------------------------------------------------------------------------------------------------------------------------------------------------------------------------------------------------------------------------------------------------------------------------------------------------------------------------------------------------------------------------------------------------------------------------------------------------------------------------------------------------------------------------------------------------------------------------------|
| Journal:                      | <i>BMJ Open</i>                                                                                                                                                                                                                                                                                                                                                                                                                                                                                                                                                                                                                                                                                                                                                                                                                                                                                                                                                                                                                                                                                                                                                                                                                                                                                                                                                                                                                                                                                                                                                                                                                                                                                                                                                                                                                                                                                                                                                                                                                                                                      |
| Manuscript ID                 | bmjopen-2022-071540.R2                                                                                                                                                                                                                                                                                                                                                                                                                                                                                                                                                                                                                                                                                                                                                                                                                                                                                                                                                                                                                                                                                                                                                                                                                                                                                                                                                                                                                                                                                                                                                                                                                                                                                                                                                                                                                                                                                                                                                                                                                                                               |
| Article Type:                 | Protocol                                                                                                                                                                                                                                                                                                                                                                                                                                                                                                                                                                                                                                                                                                                                                                                                                                                                                                                                                                                                                                                                                                                                                                                                                                                                                                                                                                                                                                                                                                                                                                                                                                                                                                                                                                                                                                                                                                                                                                                                                                                                             |
| Date Submitted by the Author: | 18-Sep-2023                                                                                                                                                                                                                                                                                                                                                                                                                                                                                                                                                                                                                                                                                                                                                                                                                                                                                                                                                                                                                                                                                                                                                                                                                                                                                                                                                                                                                                                                                                                                                                                                                                                                                                                                                                                                                                                                                                                                                                                                                                                                          |
| Complete List of Authors:     | <p>Minja, Neema W.; University of Washington, Department of Global Health; Kilimanjaro Clinical Research Institute (KCRI)<br/> Pulle, Jafesi; Uganda Heart Institute Ltd, Research<br/> Rwebembera, Joselyn; Uganda Heart Institute Ltd, Department of Adult Cardiology<br/> de Loizaga , Sarah R. ; Cincinnati Children's Hospital Medical Center, The Heart Institute<br/> Fall, Ndate; Cincinnati Children's Hospital Medical Center, The Heart Institute<br/> Ollberding, Nicholas; Cincinnati Children's Hospital Medical Center, Division of Biostatistics and Epidemiology; University of Cincinnati College of Medicine, Department of Pediatrics,<br/> Abrams, Jessica; University of Cape Town, Department of Pediatrics and Child Health; Reach<br/> Atala, Jenifer; Uganda Heart Institute Ltd<br/> Kamarembo, Jenipher; Uganda Heart Institute Ltd<br/> Oyella, Linda; Uganda Heart Institute Ltd<br/> Odong, Francis; Uganda Heart Institute Ltd<br/> Nalubwama, Haddy; Makerere University<br/> Nakagaayi, Doreen; Uganda Heart Institute Ltd, Department of Adult Cardiology; Cincinnati Children's Hospital Medical Center, The Heart Institute<br/> Sarnacki, Rachel; Children's National Medical Center, Cardiology<br/> Su, Yanfang; University of Washington, Department of Global Health<br/> Dexheimer, Judith W.; Cincinnati Children's Hospital Medical Center, Department of Biomedical Informatics; University of Cincinnati College of Medicine<br/> Sable, Craig ; Children's National Hospital, Cardiology<br/> Longenecker, Chris T.; University of Washington, Department of Global Health &amp; Division of Cardiology<br/> Danforth, Kristen ; University of Washington, Department of Global Health<br/> Okello, Emmy; Uganda Heart Institute Ltd, Department of Adult Cardiology; Makerere University College of Health Sciences, Department of Medicine, College of Health Science,<br/> Beaton, Andrea; Cincinnati Children's Hospital Medical Center, Cardiology<br/> Watkins, DA; University of Washington, Department of Global Health;</p> |

|                                    |                                                                                                                                                          |
|------------------------------------|----------------------------------------------------------------------------------------------------------------------------------------------------------|
|                                    | University of Washington, Department of general medicine                                                                                                 |
| <b>Primary Subject Heading</b> :   | Cardiovascular medicine                                                                                                                                  |
| <b>Secondary Subject Heading</b> : | General practice / Family practice                                                                                                                       |
| <b>Keywords</b> :                  | Valvular heart disease < CARDIOLOGY, Adult cardiology < CARDIOLOGY, Health informatics < BIOTECHNOLOGY & BIOINFORMATICS, REGISTRIES, PREVENTIVE MEDICINE |
|                                    |                                                                                                                                                          |

SCHOLARONE™  
Manuscripts

## Evaluating the implementation of a dynamic digital application to enable community-based decentralisation of rheumatic heart disease case management in Uganda: protocol for a hybrid type III effectiveness-implementation study

Neema W. Minja<sup>1,2,3\*</sup>, Jafesi Pulle<sup>2</sup>, Joselyn Rwebembera<sup>4</sup>, Sarah R. de Loizaga<sup>5</sup>, Ndate Fall<sup>5</sup>, Nicholas J. Ollberding<sup>6,7</sup>, Jessica Abrams<sup>8,9</sup>, Jenifer Atala<sup>2</sup>, Jenipher Kamarembo<sup>2</sup>, Linda Mary<sup>2</sup>, Francis Odong<sup>2</sup>, Haddy Nalubwama<sup>10</sup>, Doreen Nakagaayi<sup>4,5</sup>, Rachel Sarnacki<sup>11</sup>, Yanfang Su<sup>1</sup>, Judith W. Dexheimer<sup>13,14,15</sup>, Craig Sable<sup>16</sup>, Chris T. Longenecker<sup>17</sup>, Kristen Danforth<sup>1</sup>, Emmy Okello<sup>4,17</sup>, Andrea Beaton<sup>5</sup>, David Watkins<sup>1,18</sup>

<sup>1</sup>Department of Global Health, University of Washington, Seattle, WA 98195, USA, <sup>2</sup>Uganda Heart institute, Mulago Hospital, Kampala 37392, Uganda, <sup>3</sup>Kilimanjaro Clinical Research Institute (KCRI), Moshi, Tanzania, <sup>4</sup>Department of Cardiology, Uganda Heart institute, Mulago Hospital, Kampala 37392, Uganda, <sup>5</sup>The Heart Institute, Cincinnati Children's Hospital Medical Center, Cincinnati, USA, <sup>6</sup>Division of Biostatistics and Epidemiology, Cincinnati Children's Hospital Medical Center, Cincinnati, Ohio, USA, <sup>7</sup>Department of Pediatrics, University of Cincinnati College of Medicine, Cincinnati, Ohio, USA, <sup>8</sup>Division of Pediatric Cardiology, Department of Pediatrics and Child Health, University of Cape Town, Cape Town, South Africa; <sup>9</sup>Reach, Cape Town, South Africa, <sup>10</sup>Makerere University, Kampala, Uganda, <sup>11</sup>Children's National Medical Center, Washington DC, USA, <sup>13</sup>Department of Biomedical Informatics, Cincinnati Children's Hospital Medical Center, Cincinnati, USA, <sup>14</sup>University of Cincinnati School of Medicine, Cincinnati, USA, <sup>15</sup>Division of Emergency Medicine, Cincinnati Children's Hospital Medical Center, Cincinnati, USA, <sup>16</sup>Children's National Hospital, Washington D.C., USA, <sup>17</sup>Department of Global Health & Division of Cardiology, University of Washington, Seattle, USA, <sup>17</sup>Department of Medicine, College of Health Science, Makerere University, Uganda, <sup>18</sup>Department of general medicine, University of Washington, Seattle, WA 98195, USA

\*Correspondence to:

Neema W. Minja  
[nminja@uw.edu](mailto:nminja@uw.edu)

### ABSTRACT

**Introduction:** Rheumatic heart disease (RHD) affects over 39 million people worldwide, the majority in low- and middle- income countries. Secondary antibiotic prophylaxis (SAP), given every 3 to 4 weeks can improve outcomes, provided more than 80% of doses are received. Poor adherence is strongly correlated with the distance travelled to receive prophylaxis. Decentralising RHD care has the potential to bridge these gaps and at least maintain or potentially increase RHD prophylaxis uptake. A package of implementation strategies was developed with the aim of reducing barriers to optimum SAP uptake.

**Methods and analysis:** A hybrid implementation-effectiveness study type III was designed to evaluate the effectiveness of a package of implementation strategies including a digital, cloud-based application to support decentralised RHD care, integrated into the public healthcare system in Uganda. Our overarching hypothesis is that secondary prophylaxis adherence can be maintained or improved via a decentralisation strategy, compared to the centralised delivery strategy, by increasing retention in care. To evaluate this, eligible RHD patients irrespective of their age enrolled at Lira and Gulu hospital registry sites will be consented for decentralised care at their nearest participating health centre. We estimated a sample size of 150-200 registrants. The primary outcome will be adherence to secondary prophylaxis whilst detailed implementation measures will be collected to understand barriers and facilitators to decentralisation, digital application tool adoption, and ultimately its use and scale-up in the public healthcare system.

**Ethics and dissemination:** This study was approved by the Institutional Review Board (IRB) at Cincinnati Children's Hospital Medical Center (IRB 2021-0160), and Makerere University School of Medicine Research Ethics Committee (Mak-SOMREC- 2021-61). Participation will be voluntary and informed consent or assent (>8 but <18) will be obtained prior to participation. At completion, study findings will be communicated to the public, key stakeholders and submitted for publication.

**Keywords:** Rheumatic Heart disease, BPG, Decentralisation, Registries, Technology, Implementation science, Primary health centre

### Strengths and limitations of this study

- The study methodology outlines an evaluation approach for decentralised care programs for Rheumatic Heart disease, which has not been described before, integrating an electronic RHD registry for primary health care.
- A range of implementation strategies are incorporated within a robust and iterative methodology that address known barriers to care.
- Two different geographical settings are used for the implementation in Uganda, increasing the external validity.
- The study is limited by the pre/post design and lacks an external control group.
- The small number of participating facilities and patients will limit understanding the effectiveness of the intervention.

### INTRODUCTION

Rheumatic Heart Disease (RHD) remains the most commonly acquired heart disease in people under 25 years of age (1). The median age at death, 28 years in Sub-Saharan Africa (2), translates into a large toll on the economically-productive age groups, resulting in rippled economic effects for already impoverished families (3). Furthermore, RHD is a disease associated with marked disparities, disproportionately affecting socioeconomically disadvantaged populations including children, women, poverty-stricken and marginalised minority ethnic groups (4–8). It is estimated that there are 39 million people with RHD globally, surpassing the number of people currently living with HIV/AIDS (4,9). Unlike HIV, which has seen sustained efforts towards control, RHD was not a priority on the international health development agenda for many years. Most low-income countries have no RHD programs in place, resulting in a gross underestimation of the prevalent cases and poor RHD knowledge among the healthcare workforce.

The first global resolution on rheumatic fever and RHD was adopted at the 71<sup>st</sup> World Health Assembly in 2018. Outlined among the broad clauses of this resolution is for countries to invest in community and primary healthcare workers as well as access to medicines for the prevention and control of RHD (10,11). Secondary antibiotic prophylaxis (SAP), in the form of monthly intramuscular Benzathine penicillin G (BPG), has been shown to be effective in preventing recurrent streptococcal infections - 'strep throat', acute rheumatic fever (ARF), and progression of RHD (12–14). These benefits are contingent on achieving an optimum adherence, at least  $\geq 80\%$  coverage of prescribed injections over many years of treatment (14,15). However, adherence is often suboptimal, leaving patients vulnerable to recurrent ARF and disease progression, a significant risk factor for death within eight months of diagnosis (16). Several factors have been shown to impact optimal BPG adherence – including drug supply shortages, distances travelled to the health facilities, and associated costs of attending hospitals for monthly injections (17–19).

Previous research in Uganda identified the distance people currently have to travel to receive routine monthly SAP is a major barrier, and a strong predictor of retention (20,21). This is due in part

1  
2  
3 to the absent district-level RHD programs in Uganda, where primary health care (PHC) nurses do not  
4 have practical skills and tools to efficiently manage BPG delivery for RHD patients, despite the fact  
5 that this is well within their scope of practice. Moreover, registries have been identified as an  
6 important part of RHD control measures (22–24) and set forth as a priority by RHD experts (25). In  
7 practice, centralised registries have often taken the form of static data collection (21), and not  
8 geared to scale to the community at large. While RHD programs are not yet operational at the  
9 district level in Uganda, we have an opportunity to improve access and uptake of BPG prophylaxis  
10 for the small fraction (1-2% of estimated total cases nationally) of people who have been identified  
11 and are active in the national RHD disease registry (20). Decentralisation of care to primary health  
12 facilities has been employed for other diseases, the most widespread in the region being  
13 decentralisation of HIV treatment to PHC nurses, allowing for major scale-up and availability of HIV  
14 services to those in-need (26).  
15  
16

17  
18 Demonstrating that a new approach to RHD care is effective and implementable is important for  
19 scaling RHD services more broadly. The capacity within the current centralised approach is  
20 insufficient to serve the approximately 200 - 400 thousand persons estimated to be living with RHD  
21 in Uganda. Thus, there is a need to bring RHD care into the digital age, where technology-enhanced  
22 dynamic tools can be employed to improve RHD care delivery. The ADD-RHD (Active Case Detection  
23 and Decentralized Dynamic Registry to Improve the Uptake of Rheumatic Heart Disease Secondary  
24 Prevention) study was designed to address the above-mentioned challenges, including long  
25 distances to regional hospitals and the lack of a dynamic record system. The study is called “ADD-  
26 RHD” in part because the study “adds” RHD care to the list of competencies of PHC nurses in the  
27 study sites. As a major component of this study, the Active community case management tool (ACT)  
28 that was recently developed and piloted will be introduced in this setting, intended to support  
29 clinicians with technology-enhanced support tools (27).  
30  
31

### 32 **Aims and hypothesis**

33  
34 This study aims to evaluate the effectiveness of a package of implementation strategies that  
35 includes: assessment of site readiness, decentralisation of service sites, a new mode of electronic  
36 record- keeping, health care worker training, iterative feedback during implementation,  
37 identification of champions and physical supply of medicines for improving SAP delivery for RHD  
38 care. We hypothesise that this package of strategies will be equivalent to or improve the current SAP  
39 adherence and related outcomes for enrollees in the decentralised study locations.  
40  
41

### 42 **METHODS AND ANALYSIS**

#### 43 **Study design**

44  
45 This is a mixed methods, hybrid type III effectiveness-implementation study, that will be integrated  
46 into rural and semi-urban primary health centres. This design primarily focuses on the effectiveness  
47 of a package of implementation strategies whilst collecting secondary data on clinical outcomes (28).  
48 Decentralisation of SAP delivery is postulated to at least preserve the level of adherence, whilst  
49 building capacity to scale up service delivery. The primary implementation endpoints will look at the  
50 post-implementation healthcare utilisation outcomes among enrolled patients, with a particular  
51 focus on SAP adherence (defined as proportion of days covered), which is strongly associated with  
52 the clinical outcomes of recurrence of ARF and progression of disease (14). The study will determine  
53 whether adherence to SAP post-implementation is non-inferior to the current, centralised care. We  
54 estimated a total of 150 - 200 persons with RHD Lira and Gulu will be eligible for decentralisation  
55 (statistical considerations below). Further, we will evaluate the acceptability, penetration, adoption,  
56 and cost of the implementation.  
57  
58  
59  
60



For secondary clinical outcomes, we will explore the relationship between program and adverse cardiovascular events (recurrent ARF, new or worsening heart failure, atrial fibrillation) and mortality compared to the baseline period. Because of the relatively small number of identified people with RHD in Uganda, and the centralised nature of secondary prophylaxis delivery currently at a small number of referral hospitals, we developed a non-randomised experiment using pre/post methods to demonstrate the impact of a package of strategies on implementation outcomes as well as intermediate clinical outcomes.

## Study setting

### *Current RHD care provision – National registry at central and referral regional hospitals*

Presently, a national RHD registry, a collection of clinical data for RHD patients enrolled and known to the healthcare system in Uganda is run centrally by research staff at the Uganda Heart Institute (Kampala). Initially established in 2010, the registry subsequently expanded to include a satellite centre in Kampala (Lebowa) - and regional registry sites within 3 districts across the country (Mbarara, Gulu and Lira). The current RHD registry-based care in Uganda was initiated to capture people presenting with RHD to tertiary care and has served to establish numbers of those affected together with informing patient status. Dedicated research staff provide, coordinate and monitor routine BPG prophylaxis and RHD-related patient care in the country. The RHD registry is hosted electronically on REDCap, and involves both direct data entry and transfer of paper records into REDCap (29,30). However, the majority of records are paper-based and limited to the centres, which has proven to be outdated and ineffective (Table 1).

### *The new approach – ADD-RHD*

Existing RHD registrants based in Lira and Gulu districts will have their monthly SAP visits decentralised from the current research-nurse led regional hospitals to outpatient settings of selected PHCs staffed by ministry of health nurses (Table 1). In this study, decentralisation is defined as the change of service sites for delivery of SAP for RHD registry patients, from current regional hospitals to district level PHC facilities. As part of the ADD-RHD package, the ACT application (see below) will be introduced.

**Table 1.** Comparison of current and proposed SAP delivery approaches

|                                 | <b>Current Approach – National RHD Registry</b>                                                                                                              | <b>Proposed approach – Decentralised RHD Registry at district level health facilities</b>                                                                                                 |
|---------------------------------|--------------------------------------------------------------------------------------------------------------------------------------------------------------|-------------------------------------------------------------------------------------------------------------------------------------------------------------------------------------------|
| <b>Location</b>                 | Limited to central and regional referral centres                                                                                                             | Expansion to Health centres III/IV (Lira and Gulu districts)                                                                                                                              |
| <b>Staff</b>                    | Dedicated research staff regionally                                                                                                                          | This approach will incorporate existing MOH staff at HCIII/IV at district and regional hospitals, as well as administrators and different stakeholders from Ministerial representatives   |
| <b>Patient records and data</b> | REDCap/paper-based clinical records <ul style="list-style-type: none"> <li>• Web-based electronic database largely supporting research activities</li> </ul> | ACT application <ul style="list-style-type: none"> <li>• Keeps track of BPG injections</li> <li>• Automatic adherence calculation</li> <li>• Intended for direct entry by HCWs</li> </ul> |

|                                                                                                                                                                                                             |                                                                                                                                                                                              |                                                                                                                                                                                                                                                                                                                                                                                                                                                                                                                            |
|-------------------------------------------------------------------------------------------------------------------------------------------------------------------------------------------------------------|----------------------------------------------------------------------------------------------------------------------------------------------------------------------------------------------|----------------------------------------------------------------------------------------------------------------------------------------------------------------------------------------------------------------------------------------------------------------------------------------------------------------------------------------------------------------------------------------------------------------------------------------------------------------------------------------------------------------------------|
|                                                                                                                                                                                                             | <ul style="list-style-type: none"> <li>• A mix of direct entry and transfer of paper records have been used.</li> <li>• Not scalable; not enabled to support clinical management.</li> </ul> | <ul style="list-style-type: none"> <li>• Managing patient features categorised for ‘due’ and ‘missed’ injections</li> <li>• Iterative – patient reminder integration and tracking; clinician/specialist/MOH representative communication features</li> <li>• Quality metrics - Allows easily generated quality reports for examining overall adherence, referrals for procedures and the ability to compare across facilities and regions. Potentially scalable nationwide for RHD and other chronic illnesses.</li> </ul> |
| <p>SAP, Secondary Antibiotic Prophylaxis; RHD, Rheumatic Heart Disease; HC III/IV, Health Centre III/IV; MOH, Ministry of Health; ACT – Active Community Case Management Tool; HCW – Health Care Worker</p> |                                                                                                                                                                                              |                                                                                                                                                                                                                                                                                                                                                                                                                                                                                                                            |

**The intervention**

The evidenced-based practice, secondary antibiotic prophylaxis, has been proven to be effective in reducing the recurrence of strep throat and acute rheumatic fever, the cascade of events that can progress to RHD (14,15,31). In addition to reducing the progression of RHD, there is evidence that SAP can also induce the regression of clinical RHD (32). Unless contraindicated, BPG is the gold standard and most widely used for RHD secondary prevention (14).

**Preparation for decentralisation**

In preparation for the study, facility visits, engagement of local and district health officers and consideration of the existing registry were done in order to inform important aspects of the implementation strategy.

Existing RHD registrants were mapped by residence, and consequently, four level 3 and 4 health centres (HCIII/IV) were chosen in each district based on diversity of location (city and rural parts of the districts) and RHD registrant geographical density (Figure 1). This was done in coordination with the local government, involving the District Health Administrator. In Uganda, rural and semi-urban areas are served by primary care health facilities with designated levels 1 – 4, where level 1 is the lowest basic dispensary and 4 with more services such as maternity care.

Initial collection of 12 – 18 months of intensive baseline data of existing RHD registry patients will be done at the Lira and Gulu regional hospitals, where RHD patient care is currently based. Where necessary, patients will be contacted by phone for confirmation and completeness of information in order to determine baseline BPG adherence and retention data prior to decentralisation. This data will be collected on a quarterly basis for important primary and secondary metrics defined.

Decentralisation will be a phased process starting with two of the four clinics in Lira district, followed by the remaining two, with an approximate four-week gap in-between. Thereafter, this will be replicated in Gulu after a period of four – six months to allow incorporation of planned formative feedback from decentralisation in the Lira district (Figure 2).

In this study, a package of implementation strategies (Table 2) will be employed to support a decentralised SAP delivery strategy to HC III/IV. This will be centred around the introduction of the ACT application further elaborated below.

**Table 2.** ADD-RHD Implementation strategies mapped according to Expert Recommendations for Implementing Change (ERIC) discreet implementation strategies (33)

| Strategy                                                           | Details                                                                                                                                                                                                                                                                                                                                                                                                                              |
|--------------------------------------------------------------------|--------------------------------------------------------------------------------------------------------------------------------------------------------------------------------------------------------------------------------------------------------------------------------------------------------------------------------------------------------------------------------------------------------------------------------------|
| Assess for readiness and identify barriers and facilitators        | Assessment for readiness will be done through facility visits, surveys, and engagement of local and district health officers (DHO). Patient and provider interviews will identify barriers and facilitators to decentralisation. Key stakeholder and community engagement on decentralisation logistics will serve to establish key components of the process.                                                                       |
| Change of service sites (decentralisation)                         | Four health facilities were identified based on patient clusters and distances from their residences primarily geared at increasing access and reducing distances travelled.                                                                                                                                                                                                                                                         |
| Training Health Care workers (HCWs)/ develop educational materials | HCW training was planned to include the development of education materials on RHD clinical knowledge, BPG preparation and injection skills, penicillin adverse events recognition and first aid management. A detailed description is provided below.                                                                                                                                                                                |
| Change record systems                                              | ACT application was specifically developed as a clinical tool for HCWs through stakeholder engagement and piloting (27). It encompasses in-built tools to enhance patient engagement, including clinicians' monitoring of adherence and quality metrics for monitoring supply stocks. This will replace the current regional registry. A detailed description is provided below.                                                     |
| Purposefully re-examine the implementation                         | We built in milestones to re-examine implementation activities, identify challenges, and provide feedback and support to health facilities in order to continuously improve the quality of care. This includes looking at the use of ACT for patient management, identifying challenges and giving feedback to healthcare workers in health centres.                                                                                 |
| Identify and prepare champions                                     | Initial assessment for readiness informed the need for local champions at each health centre, selected to drive the implementation by providing support and driving quality improvement activities such as updating stock and supplies data for quality metrics on the ACT application.                                                                                                                                              |
| Physical supply of medicines*                                      | Although historically used to treat other conditions, such as syphilis, its consistent availability is variable in public facilities in Uganda. Hence, through stakeholder and local engagement, temporary BPG supply was found to be an essential initial component to the success of the intervention at a few facilities. This marked an iterative adaptation in light of short-term regulatory constraints. For some facilities, |

increasing BPG supply through the government system was motivated by history of use, and hence a gap in supply was inevitable during the initial post-decentralisation period. Covering this gap was an important aspect to implementation.

\*Not a specific ERIC implementation strategy. DHO, District Health Officer; HCW, Health Care Worker; RHD, Rheumatic Heart Disease; ACT, Active Community Case Management Tool; BPG, Benzathine Penicillin G.

### ACT application

The ACT application is a digital tool-kit designed to build on REDCap, the current research database. The application incorporates several important features for RHD control including; 1) Availability of a simplified, interactive record of patients' administered BPG injections with automatic adherence calculations and relevant patient details, investigations and management; 2) A 'manage my patient' feature that allows clinicians to track patient status by due or missed visits that integrates with a clinician-facing reminder function, and 3) Monitoring of medicinal and supply stocks at facility and central levels. ACT is a small-scale medical record application built with the overarching goal of its integration for RHD care nationally and internationally, with potential to be replicated for use in other chronic disease management. Table 1 summarises the current and new approach with regards to ACT as a novel electronic tool. The use of technology enhanced tools in this setting will require some additional efforts. This was informed by the pilot training where many HCWs were not conversant with digital tools and apps. The feedback was then used to develop a simplified application version for HCWs (27). Secondly, an offline feature was added to ACT to ensure interruptions are minimised given the instability with internet connectivity in this setting. Further, initial on-going site support visits have been planned at pre-determined intervals (frequently at first and then more spaced out) and will serve to provide refresher training on RHD and ACT. Data will be collected around these and incorporated into the implementation evaluation.

### Provider education

Training of health workers from health centres will be central to this project. Whilst advocacy and awareness of RHD has been increasing due to established research efforts, a large gap remains in provider RHD competency. Recent research found that less than 25% of facilities across several Ugandan districts had received any RHD training in the past two years and only 11% and 8% HC III and IVs had any RHD guidelines (34). Further, limited RHD knowledge was a prominent theme in published health care provider interviews, who expressed a strong desire for training (34).

Currently, service provision of BPG for RHD in HC III/IV is not systematically undertaken. This informed an initial pilot training of representatives from each of the selected HCIII/IV facilities for decentralisation in Lira. The pilot identified deficiencies in specific areas that were instrumental in tailoring educational materials developed for pre-decentralisation training. We found variable but low RHD knowledge and experience among the HCWs. BPG is known to be a difficult injection to administer due to its nature to crystallise and presents challenges for unexperienced workers. A substantial portion of the planned training (and refresher sessions planned periodically thereafter), will focus on the practical aspects of BPG administration, as well as recognition and triage of potential BPG allergic reactions and anaphylaxis. The second set of training materials will consist of introduction to the ACT application. Additionally, a standard operating procedure (SOP) was developed, which will serve as the guideline for all decentralisation procedures in health facilities in both districts.

1  
2  
3 'Champions', will be identified by the RHD research nurses based at the regional hospitals. The  
4 relationship between them and the staff at the health centres has been fostered overtime, giving  
5 them an advantage to identify overall motivated staff in different aspects of decentralisation, with a  
6 particular emphasis on electronic record patient management and follow-up. Champions will be  
7 identified for each health centre in the first few months after decentralisation and geared to drive  
8 the implementation and continuous support Inclusion of medical records personnel was not initially  
9 planned for. However, the pilot training revealed that these personnel are more technologically  
10 competent and including them would facilitate support at the health centres throughout the  
11 implementation".  
12  
13

### 14 **Study population and recruitment**

15  
16 All eligible RHD registrants will be approached by trained study staff. After an explanation of the  
17 study is provided, the registrants will be invited to participate in decentralisation. Registrants will be  
18 presented with the option to receive their care at one of the four community HCs selected in each  
19 district that is closest to them. Participation for all participants is voluntary and informed consent or  
20 assent from a parent or guardian (for those > 8 but < 18 years) will be sought and signed before  
21 enrolment.  
22  
23

### 24 **Participant eligibility**

25  
26 **Inclusion criteria:** Eligible participants for decentralisation will be all RHD registrants who live within  
27 20 km of a participating health centres.  
28  
29

30  
31 **Exclusion criteria:** Registrants will be ineligible for participation if they have severe RHD - shown to  
32 be associated with an increased risk of a vasovagal mediated sudden deterioration during or  
33 immediately after a BPG injection; caution has been issued on BPG use in this population (35).  
34 According to these recommendations, we will exclude patients with severe mitral stenosis, severe  
35 aortic regurgitation or stenosis, ventricular dysfunction (EF < 50%) or with advanced symptoms  
36 (NYHA class III/IV) (35) as ascertained by echocardiography performed within 6 months prior to  
37 decentralisation.  
38

39 Registrants consenting to decentralisation will have the necessary information regarding their care  
40 at participating health centres given to them during their last visit at the regional hospital. Following  
41 this, registration of health centre nurses to the ACT application will commence. Given the novelty of  
42 systematic RHD care delivery in clinics, the research team will be on-site (at the health centres) for  
43 the first week and frequently thereafter, according to a documented schedule in order to provide  
44 the necessary support during this period. This will be phased out slowly over three to six months. As  
45 one of the key implementation strategies, we purposefully planned to re-examine implementation  
46 activities- including patient flow at clinics and the use of ACT for patient management. Any  
47 challenges identified will be attended to through a feedback process between healthcare workers in  
48 health centres, the research team and study administrators.  
49  
50

### 51 **Implementation outcomes**

52  
53 For the primary implementation outcome, BPG adherence will be measured as a proxy for post-  
54 implementation healthcare utilisation among registrants. The annualised proportion of persons who  
55 have  $\geq 80\%$  of days covered pre- and post-decentralisation will be compared. At the individual level,  
56 adherence is calculated as the proportion of days covered over days prescribed BPG (Table 3). Data  
57 will be obtained from the ACT application and RHD REDCap registry for baseline pre-decentralisation  
58  
59  
60

adherence data. Based on our hypothesis, we will be testing for non-inferiority of SAP adherence, post-implementation.

**Table 3.** Key metrics collected during baseline data collection

| Primary Metric                                                                                                             | Operational Definition                                                                                                                                                                                                                                                                                          | Collection Method                                                                                                                                    |
|----------------------------------------------------------------------------------------------------------------------------|-----------------------------------------------------------------------------------------------------------------------------------------------------------------------------------------------------------------------------------------------------------------------------------------------------------------|------------------------------------------------------------------------------------------------------------------------------------------------------|
| BPG Adherence                                                                                                              | The proportion of persons who have 80% of days covered. Each registrants' days of coverage will be calculated as:<br>Days of coverage (%) = Days with adequate BPG coverage*/Days prescribed BPG.<br>*Adequate BPG coverage defined as the prescribed interval between BPG injection (i.e. 28, 21, or 14 days). | National Registry and ACT application, based on dates of injections as compared to prescription                                                      |
| Secondary Metrics                                                                                                          | Operational Definition                                                                                                                                                                                                                                                                                          | Collection Method                                                                                                                                    |
| Retention                                                                                                                  | Defined as being seen at least twice in a 12-month period for clinical review (outside or in conjunction with BPG delivery)                                                                                                                                                                                     | National Registry and ACT application                                                                                                                |
| Composite Adverse CV events                                                                                                | Combination of new or worsening heart failure, atrial fibrillation, infective endocarditis, and/or recurrent ARF                                                                                                                                                                                                | National Registry and ACT application, supplemented as needed by patient interview                                                                   |
| RHD Mortality                                                                                                              | Death of an RHD registrant that is determined to be the direct or indirect result of RHD                                                                                                                                                                                                                        | Multimodality, direct report from family or hospital/clinic if death was witnessed by medical staff                                                  |
| BPG Stockouts                                                                                                              | Number of days with no BPG or BPG-related supplies (needles, syringes, dilutant, lidocaine, etc.) to be tracked individually, and # of days at <20% supply (based on anticipated number of RHD registrants assigned to that clinical location)                                                                  | ONLY tracked during decentralised care, through both stock inventory by our research staff (monthly surveillance) and reports on the ACT application |
| BPG, Benzathine Penicillin G; ACT, Active Community Case Management Tool; CV, cardiovascular; RHD, Rheumatic Heart Disease |                                                                                                                                                                                                                                                                                                                 |                                                                                                                                                      |

The taxonomy of implementation constructs proposed by Proctor et al., (36) will be used to guide the data collection, levels of analysis, and measurement of implementation outcomes, with particular emphasis on acceptability, adoption, penetration, and implementation cost.

Pre-implementation, formative research was planned and undertaken among stakeholders in the two districts to inform the design and logistical aspects of the project. At the start of the study, facility surveys will collect monthly data on clinic staff numbers and roles, availability of drugs (which will inform drug-stock outs) and consumables - with particular emphasis on RHD care-relevant supplies. We will evaluate the implementation outcomes of acceptability, adoption and penetration by conducting a concurrent mixed methods evaluation of the ADD-RHD program (Table 4). Pre/post decentralisation patient and provider qualitative interviews using semi-structured questionnaires have been planned within a month prior to decentralisation to get in-depths perspectives from potential participants, including foreseen barriers to program roll-out. This was intended to be



1  
2  
3 formative, and no formal framework will be used. However, six key areas of interest pertaining to  
4 decentralisation were used to develop *a priori* data extraction template. A matrix-based rapid  
5 qualitative analysis will be done and themes and sub-themes generated will enable the  
6 incorporation of findings in real-time to optimise the decentralisation of RHD care. This was planned  
7 as part of implementation iteration (together with a staggered roll-out in Lira and then Gulu district),  
8 for quality improvement. Further, database queries, anecdotes, user inquiries and field diaries from  
9 support staff will be kept to inform determinants of implementation. In particular, we will collect  
10 data on patient use of health centres and return rates (if any) to the regional hospital that will  
11 inform acceptability (Table 4). A sub-study will evaluate costs, as an important implementation  
12 outcome. High out of pocket costs have been previously documented to be associated with the  
13 current centralised care (3). It is postulated that a decentralised model will result in reduction of out-  
14 of-pocket expenditures. To enable this evaluation, pre-planned patient surveys, time and motion  
15 studies (37) and facility cost data will be used in an embedded economic evaluation and reported  
16 separately from the main study. Furthermore, time and motion studies will be incorporated to  
17 evaluate any disruptions to care and potential distribution of valuable manpower resources which  
18 will be valuable for planning and scaling the intervention if it were successful.  
19  
20  
21  
22  
23  
24  
25  
26  
27  
28  
29  
30  
31  
32  
33  
34  
35  
36  
37  
38  
39  
40  
41  
42  
43  
44  
45  
46  
47  
48  
49  
50  
51  
52  
53  
54  
55  
56  
57  
58  
59  
60

**Table 4.** Data sources for the evaluation of implementation outcomes

|               | <b>Definition</b> (Proctor et al, 2011) (36)                                                                                                                                                        | <b>Provider Level</b>                                                                                                                       | <b>Patient Level</b>                                                                                      | <b>Facility Level</b>                                                                                                                                 | <b>ACT Application Audits</b>                                                                                                                                            | <b>Record Audit at RRH Visits</b>                                                                           |
|---------------|-----------------------------------------------------------------------------------------------------------------------------------------------------------------------------------------------------|---------------------------------------------------------------------------------------------------------------------------------------------|-----------------------------------------------------------------------------------------------------------|-------------------------------------------------------------------------------------------------------------------------------------------------------|--------------------------------------------------------------------------------------------------------------------------------------------------------------------------|-------------------------------------------------------------------------------------------------------------|
| Acceptability | Relates to perceptions on suitability and agreeability of the innovation and the satisfaction among stakeholders. Analysis will be at the patient and provider level.                               | Provider pre-/post-decentralisation interviews                                                                                              | Patient pre-/post-decentralisation interviews<br>Coded under acceptability and health setting preferences | Administrator interview                                                                                                                               | ACT usage audit/data queries.<br>Documented ACT application changes.                                                                                                     | RRH injection record audits<br>Self-decentralisation rates and rates of return to RRH post-decentralisation |
| Adoption      | Defined as the intention to take up an innovation; also quoted as “uptake” (Proctor et al, 2011, p.69)(36). In this study adoption will be analysed at the provider level at the health facilities. | Provider pre-/post-decentralisation interviews<br>Observation<br>Time & Motion study                                                        | N/A                                                                                                       | Monthly Health facility survey - organisation & appropriateness of RHD medicinal and supplies order based on need.<br><br>Direct observation.         | ACT usage audit<br>-Trends of use by HC nurses<br>-Completeness of BPG injections<br>-Use of additional features (Reminder & Update of stock alerts)                     | Examination of entered data on BPG card versus ACT application                                              |
| Penetration   | Refers to the absorption or incorporation of the practice into the service setting and looks at the integration of the innovation in question. The level of                                         | Provider pre-/post-decentralisation interviews.<br>Attendance to RHD cases. Numbers of providers trained versus numbers delivering service. | N/A                                                                                                       | Monthly Health facility survey - Improvements in medicinal (BPG) and supply shortages<br>Direct observation<br><br>Regular attendance of RHD patients | Query-generation rates on ACT application<br>Use of paper records for RHD care<br>ACT usage by HC nurses – completion of information and other usage parameters overtime | Reduction in BPG visits to RRH services for decentralised registrants                                       |

1  
2  
3  
4  
5  
6  
7  
8  
9  
10  
11  
12  
13  
14  
15  
16  
17  
18  
19  
20  
21  
22  
23  
24  
25  
26  
27  
28  
29  
30  
31  
32  
33  
34  
35  
36  
37  
38  
39  
40  
41  
42  
43  
44  
45  
46

|                                                                                                 |                                           |  |  |  |                                                                   |  |
|-------------------------------------------------------------------------------------------------|-------------------------------------------|--|--|--|-------------------------------------------------------------------|--|
|                                                                                                 | analysis is at the health facility level. |  |  |  | Rates of re-education for HC nurses on deficient areas identified |  |
| RRH, Regional referral hospital; ACT, Active community case management tool; HC, Health Centre. |                                           |  |  |  |                                                                   |  |

For peer review only

## Secondary clinical outcomes

Information on secondary clinical outcomes will be reported (Table 3). We will assess the non-inferiority of the decentralised registry on rates of retention at two years post implementation (Table 3). Further, a composite of adverse cardiovascular events, including a combination of new or worsening heart failure, recurrent ARF, atrial fibrillation, infective endocarditis and mortality will be documented during decentralisation and records extracted for baseline period rates. In an exploratory analysis, using continuous measures of adherence, we will compare event rates among more- and less-adherent participants to validate the purported dose-response relationship between SAP and ARF, clinical progression of RHD in this context.

## Statistical considerations

The primary outcome of the study is to determine whether adherence after decentralisation is non-inferior to the baseline adherence recorded for national RHD registry. We propose a one-sided exact binomial test at  $\alpha = 0.025$  of the null hypothesis that the proportion of adherent patients during the intervention period is less than baseline by more than 10%. Based on previous experience with this patient population, we expect approximately 150 - 200 persons with RHD will contribute data on adherence during the baseline and intervention periods in Lira and Gulu. We also approximate 75% of these patients will receive 80% of BPG injections. Based on these assumptions, a one-sided alpha of 0.025, taking a total of between 150 - 200 participants will provide between 72 - 86% power to reject the null hypothesis of inferiority when the baseline percent adherent is 75% and the NIM is -10%. Thus, we expect to be at least moderately powered to reject the null hypothesis of inferiority at the proposed non-inferiority margin.

## Patient and public involvement

Within the current set-up of RHD care in Uganda, patients attending the main hospital in both districts expressed the problems they faced with long distances travelled from residences (often in rural areas) to come for monthly RHD care at the main hospital. These patients' experiences were incorporated into the design and informed the implementation strategies of this study. Furthermore, stakeholder and community engagement, local and district health administrators were consulted for input on the logistics of the study, including the use of ACT software to enhance decentralised RHD care to the rural and semi-urban health facilities.

Results of the study will be made available to participants and the community through the health facilities and the main hospital in both districts where RHD follow-ups are done.

## ETHICS AND DISSEMINATION

This study was approved by the Institutional Review Board at Cincinnati Children's Hospital Medical Center (IRB 2021-0160), and Makerere University School of Medicine Research Ethics Committee (Mak-SOMREC- 2021-61). Participation will be voluntary and informed consent or assent (>8 but <18) will be obtained and signed prior to participation.

At completion, study findings will be published in peer-reviewed journals and communicated to the public and key stakeholders.

The ADD-RHD study was initially approved on 04/03/2021. Decentralisation of study participants is currently being finalised in the second site and post-decentralisation data collection will follow for

1  
2  
3 12 months to December 2023. Data analysis is planned to start early 2024, with the full project due  
4 for completion in April 2024.  
5  
6  
7

## 8 **DISCUSSION**

9  
10 Like many chronic diseases, the successful prevention of RHD entails optimum adherence to monthly  
11 BPG injections, the cornerstone of RHD control. Decentralisation of health services has long been  
12 advocated as a means to improve health service delivery and reach (38). Successful decentralisation  
13 of care to PHCs resulted in the widespread availability and accessibility of HIV treatments in similar  
14 settings, playing a key role in HIV program successes (39). Disease registries have been previously  
15 advocated in the early 2000s by organisations such as World Health Federation and RHD Action (40),  
16 which outlined minimum standards and guidance for RHD registries. However, these efforts have  
17 seen variable country uptake, often characterised by centralised registries, fragile paper records and  
18 limitations in quality assurance and continuous monitoring. To date, no modern version of a  
19 decentralised national RHD registry currently exists in LMICs. The ACT application, one of the  
20 packages of implementation strategies, was designed to mitigate the static nature of registries and  
21 further aid health workers in managing RHD secondary prevention. If successful, this will modernise  
22 how we approach RHD secondary prevention in Uganda and other similar settings, where RHD is  
23 prevalent. Based on this, and through long-standing partnerships encompassing local, regional and  
24 district key stakeholder engagement, we established the feasibility and suitability of ADD-RHD.  
25  
26

27  
28 ACT is a novel technology-enabled dynamic application that integrates features to empower health  
29 workers at all levels of care with supportive tools to track, monitor and better engage RHD patients.  
30 In addition, the application will facilitate health centre communication channels to responsible  
31 bodies, such as relevant persons in medical supplies and the ministry of health, an important aspect  
32 to ensure availability of medicines, supplies and quality improvement. Electronic medical records are  
33 yet to be incorporated widely in health facilities in Uganda, hence the tailored simplification for  
34 PHCs and initial support provided by the current research collaborative will be valuable and presents  
35 a potential for its absorption into future electronic medical records expansion plans (27). Ultimately,  
36 the study can be used as a model for chronic disease management by informing how we integrate  
37 these digital health systems to enhance patient care in similar settings where HCWs are not  
38 necessarily well-versed with computers or technology.  
39  
40

41  
42 We acknowledge some limitations to this study. Firstly, the study design did not use an external  
43 control group, and had a fixed sample size, reflecting the limited cases currently identified and  
44 established in the registry from previous screening efforts. The use of fairly robust and more  
45 comprehensive mixed-methods with the additional collection of more granular data was designed to  
46 mitigate some of these limitations. Another potential limitation is around the ACT application,  
47 requiring baseline user comfort with technology and smart phones, which was not the case with  
48 some community public health workers. The pilot training informed the development of a simplified  
49 application version tailored specifically to the roles of the HCWs (27). In addition, internet  
50 connectivity is often unstable in this setting, which informed the incorporation of an offline feature  
51 function that may enhance the functionality and uptake of the application. Lastly, several other  
52 system-level factors pose potential challenges, including long waiting times, staff shortages and drug  
53 availability that are generalisable country-wide, but which may impact implementation. Securing  
54 medication by use of external resources in the initial period limits the generalisability without  
55 modifications to the health system. However, it demonstrates the values of securing supplies to  
56 make improvements and signifies more work needs to be done in this area. Despite evidence  
57 regarding SAP, most governments have not developed nor scaled- up RHD programs, limiting access  
58 to healthcare available to patients. Ultimately, through the project, there is an opportunity to re-  
59  
60

design and equip PHCs to overcome some of these barriers to healthcare and serve as a foundation for scaling up much needed RHD services to different parts of the country.

## LIST OF ABBREVIATIONS

**ACT:** Active Community Case Management Tool

**ADD-RHD:** Active Case Detection and Decentralized Dynamic Registry to Improve the Uptake of Rheumatic Heart Disease

**ARF:** Acute Rheumatic Fever

**BPG:** Benzathine Penicillin G

**EMR:** Electronic Medical Records

**HC III/IV:** Health Centre III/IV

**HCW:** health Care Worker

**LMIC:** Low- and middle Income country

**MOH:** Ministry of Health

**OOP:** Out of Pocket

**PHC:** Primary Health Care

**RHD:** Rheumatic Heart Disease

**SAP:** Secondary Antibiotic Prophylaxis

## DECLARATIONS

### Consent for publication

Not applicable.

### Data availability statement

Data sharing is not applicable as no datasets are generated and/or analysed for this study

### Competing interests

The authors declare that they have no competing interests

### Funding

The ADD-RHD study was funded through the AHA SFRN Grant 20SFRN35380042.

Redcap registry was supported by Clinical and Translational Science Award (CTSC) UL1TR002548.

### Contributors

AB, DW, EO, CL, CS, JR and KD initially conceptualised the different aspects of the study.

DW, KD, AB, NM, JP, JR, EO, NO, JD, SdL, RS, NF and JA contributed to the study design and proposal.

NM, JP, JR, NF, SdL, RS, JA, JK, DN, LM, FO, HN, YS, KD, & DW contributed to the implementation aspects of the study.

NM, DW, AB, KD wrote the initial draft of the protocol paper.

All authors reviewed, updated and approved the final protocol.

### Acknowledgements

The authors would like to thank all the local and international stakeholders who contributed to the refinement of this protocol, including the patients, staff at the central, district and local health centres who volunteered their time and inputs to the logistical aspects of decentralisation planning. Sincere thanks to Nicholas Felicelli, Kristen Tillman, Riley

Morrison and other members from the design team who contributed to the ACT application build.

## REFERENCES

1. Ghamari S-H, Kangevari MA-, Moghaddam SS. Rheumatic Heart Disease Is a Neglected Disease Relative to Its Burden Worldwide : Findings From Global Burden of Disease 2019. 2022;11(e025284).
2. Zühlke L, Karthikeyan G, Engel ME, Rangarajan S, Mackie P, Cupido-Katya Mauff B, et al. Clinical Outcomes in 3343 Children and Adults with Rheumatic Heart Disease from 14 Low- and Middle-Income Countries: Two-Year Follow-Up of the Global Rheumatic Heart Disease Registry (the REMEDY Study). *Circulation*. 2016;134(19):1456–66.
3. Opara CC, Du Y, Kawakatsu Y, Atala J, Beaton AZ, Kansiiime R, et al. Household Economic Consequences of Rheumatic Heart Disease in Uganda. *Front Cardiovasc Med*. 2021;8.
4. Watkins DA, Johnson CO, Colquhoun SM, Karthikeyan G, Beaton A, Bukhman G, et al. Global, regional, & national burden of rheumatic heart disease, 1990-2015. *N Engl J Med*. 2017;377(8):713–22.
5. Okello E, Kakande B, Sebatta E, Kayima J, Kuteesa M, Mutatina B, et al. Socioeconomic and environmental risk factors among rheumatic heart disease patients in Uganda. *PLoS One*. 2012;7(8).
6. Steer AC. Historical aspects of rheumatic fever. Vol. 51, *Journal of Paediatrics and Child Health*. 2015.
7. Australian Institute of Health and Welfare (AIHW). Rheumatic heart disease and acute rheumatic fever in Australia: 1996-2012. *Cardiovasc Dis Ser*. 2013;36(CVD 60).
8. Carapetis JR, Beaton A, Cunningham MW, Guilherme L, Karthikeyan G, Mayosi BM, et al. Acute rheumatic fever and rheumatic heart disease. *Nat Rev Dis Prim*. 2016;2.
9. World Health Organization. HIV/AIDS Key Facts [Internet]. 2021. Available from: <https://www.who.int/news-room/fact-sheets/detail/hiv-aids>
10. Seventy-first World Health Assembly. Rheumatic Fever and Rheumatic Heart Disease [Internet]. Available from: [https://apps.who.int/gb/ebwha/pdf/WHA71/A71\\_R14-en.pdf](https://apps.who.int/gb/ebwha/pdf/WHA71/A71_R14-en.pdf)
11. White A. WHO Resolution on rheumatic heart disease. *Eur Heart J*. 2018;39(48).
12. Gerber MA, Baltimore RS, Eaton CB, Gewitz M, Rowley AH, Shulman ST, et al. Prevention of rheumatic fever and diagnosis and treatment of acute streptococcal pharyngitis: A scientific statement from the American Heart Association Rheumatic Fever, Endocarditis, and Kawasaki Disease Committee of the Council on Cardiovascular Disease i. *Circulation*. 2009;119(11):1541–51.
13. Rothenbühler M, O’Sullivan CJ, Stortecky S, Stefanini GG, Spitzer E, Estill J, et al. Active surveillance for rheumatic heart disease in endemic regions: A systematic review and meta-analysis of prevalence among children and adolescents. *Lancet Glob Heal* [Internet]. 2014;2(12):e717–26. Available from: [http://dx.doi.org/10.1016/S2214-109X\(14\)70310-9](http://dx.doi.org/10.1016/S2214-109X(14)70310-9)
14. Manyemba J, Mayosi BM. Penicillin for secondary prevention of rheumatic fever. *Cochrane Database Syst Rev*. 2002;
15. de Dassel JL, de Klerk N, Carapetis JR, Ralph AP. How many doses make a difference? An analysis of secondary prevention of rheumatic fever and rheumatic heart disease. *J Am Heart Assoc*. 2018;7(24).
16. Zimmerman M, Kitooleko S, Okello E, Ollberding N, Sinha P, Mwambu T, et al. Clinical outcomes of children with rheumatic heart disease. *Heart* [Internet]. 2022 Apr 1;108(8):633 LP – 638. Available from: <http://heart.bmj.com/content/108/8/633.abstract>
17. Edwards JG, Barry M, Elsayed M. Health System Factors Serving as Facilitators and Barriers to Rheumatic Heart Disease Care in Sudan. *Res Sq*. 2021;
18. Kevat PM, Reeves BM, Ruben AR, Gunnarsson R. Adherence to Secondary Prophylaxis for



- 1  
2  
3 Acute Rheumatic Fever and Rheumatic Heart Disease: A Systematic Review. *Curr Cardiol Rev.* 2017;13(2):155–66.
- 4  
5  
6 19. Huck DM, Nalubwama H, Longenecker CT, Frank SH, Okello E, Webel AR. A qualitative  
7 examination of secondary prophylaxis in rheumatic heart disease: Factors influencing  
8 adherence to secondary prophylaxis in Uganda. *Glob Heart [Internet].* 2015;10(1):63-69.e1.  
9 Available from: <http://dx.doi.org/10.1016/j.gheart.2014.10.001>
- 10  
11 20. Longenecker CT, Morris SR, Aliku TO, Beaton A, Costa MA, Kanya MR, et al. Rheumatic heart  
12 disease treatment cascade in Uganda. *Circ Cardiovasc Qual Outcomes.* 2017;10(11).
- 13  
14 21. Okello E, Longenecker CT, Scheel A, Aliku T, Rwebembera J, Mirembe G, et al. Impact of  
15 regionalisation of a national rheumatic heart disease registry: The Ugandan experience. *Heart*  
16 *Asia.* 2018;10(1):1–5.
- 17  
18 22. Remenyi B, Carapetis J, Wyber R, Taubert K, Mayosi BM. Position statement of the World  
19 Heart Federation on the prevention and control of rheumatic heart disease. *Nat Rev Cardiol.*  
20 2013;10(5):284–92.
- 21  
22 23. Karthikeyan G, Zühlke L, Engel M, Rangarajan S, Yusuf S, Teo K, et al. Rationale and design of  
23 a Global Rheumatic Heart Disease Registry: The REMEDY study. *Am Heart J.* 2012;163(4).
- 24  
25 24. Rémond MGW, Coyle ME, Mills JE, Maguire GP. Approaches to improving adherence to  
26 secondary prophylaxis for rheumatic fever and rheumatic heart disease: A literature review  
27 with a global perspective. Vol. 24, *Cardiology in Review.* 2016.
- 28  
29 25. Zühlke LJ, Watkins DA, Perkins S, Wyber R, Mwangi J, Markbreiter J, et al. A Comprehensive  
30 Needs Assessment Tool for Planning RHD Control Programs in Limited Resource Settings.  
31 *Glob Heart.* 2017;12(1):25–31.
- 32  
33 26. Kredo T, Ford N, Adeniyi FB, Garner P. Decentralising HIV treatment in lower- and middle-  
34 income countries. Vol. 2013, *Cochrane Database of Systematic Reviews.* 2013.
- 35  
36 27. De Loizaga, Sarah R, Pulle Jafes, Rwebembera, Joselyn, Abrams, Jessica, Atala Jenifer,  
37 Chestnut Emily, Danforth Kristen, Fall Ndate, Felicelli Nicholas, Laphorn Karen, Longenecker  
38 Chris T, Minja Neema W, Moore Ryan A, Morrison Riley, Mwangi Jeremiah, Nak DJW.  
39 Development and Pilot of the Active Community Case Management Tool (ACT Platform): A  
40 dynamic tool for rheumatic heart disease case management in Uganda. *Appl Clin Inform.*  
41 2023; Submitted Manuscript ID ACI-2022-12-RA-0339.R1.
- 42  
43 28. Curran GM, Bauer M, Mittman B, Pyne JM, Stetler C. Effectiveness-implementation hybrid  
44 designs: Combining elements of clinical effectiveness and implementation research to  
45 enhance public health impact. *Med Care.* 2012;50(3).
- 46  
47 29. Harris PA, Taylor R, Thielke R, Payne J, Gonzalez N, Conde JG. Research electronic data  
48 capture (REDCap)-A metadata-driven methodology and workflow process for providing  
49 translational research informatics support. *J Biomed Inform.* 2009;42(2).
- 50  
51 30. Harris PA, Taylor R, Minor BL, Elliott V, Fernandez M, O’Neal L, et al. The REDCap consortium:  
52 Building an international community of software platform partners. Vol. 95, *Journal of*  
53 *Biomedical Informatics.* 2019.
- 54  
55 31. Watkins DA, Beaton AZ, Carapetis JR, Karthikeyan G, Mayosi BM, Wyber R, et al. Rheumatic  
56 Heart Disease Worldwide: JACC Scientific Expert Panel. *J Am Coll Cardiol.* 2018;72(12):1397–  
57 416.
- 58  
59 32. Tompkins DG, Boxerbaum B, Liebman J. Long-term prognosis of rheumatic fever patients  
60 receiving regular intramuscular benzathine penicillin. *Circulation.* 1972;45(3).
33. Powell BJ, Waltz TJ, Chinman MJ, Damschroder LJ, Smith JL, Matthieu MM, et al. A refined  
compilation of implementation strategies: Results from the Expert Recommendations for  
Implementing Change (ERIC) project. *Implement Sci.* 2015;10(1).
34. Ndagire E, Kawakatsu Y, Nalubwama H, Atala J, Sarnacki R, Pulle J, et al. Examining the  
ugandan health system’s readiness to deliver rheumatic heart disease-related services. *PLoS*  
*Negl Trop Dis [Internet].* 2021;15(2):1–16. Available from:  
<http://dx.doi.org/10.1371/journal.pntd.0009164>

- 1
- 2
- 3
- 4 35. Sanyahumbi A, Ali S, Benjamin IJ, Karthikeyan G, Okello E, Sable CA, et al. Penicillin Reactions
- 5 in Patients With Severe Rheumatic Heart Disease: A Presidential Advisory From the American
- 6 Heart Association. *J Am Heart Assoc.* 2022;11(5):1–9.
- 7 36. Proctor E, Silmere H, Raghavan R, Hovmand P, Aarons G, Bunker A, et al. Outcomes for
- 8 implementation research: Conceptual distinctions, measurement challenges, and research
- 9 agenda. *Adm Policy Ment Heal Ment Heal Serv Res.* 2011;38(2).
- 10 37. Gold HT, McDermott C, Hoomans T, Wagner TH. Cost data in implementation science:
- 11 categories and approaches to costing. *Implement Sci.* 2022;17(1).
- 12 38. Bossert T. Analyzing the decentralization of health systems in developing countries: Decision
- 13 space, innovation and performance. *Soc Sci Med.* 1998;47(10).
- 14 39. Geng EH, Nash D, Kambugu A, Zhang Y, Braitstein P, Christopoulos KA, et al. Retention in care
- 15 among HIV-infected patients in resource-limited settings: Emerging insights and new
- 16 directions. Vol. 7, *Current HIV/AIDS Reports.* 2010.
- 17 40. RHD Action. RHD Registers [Internet]. [cited 2022 Oct 26]. Available from:
- 18 <https://rhdaction.org/control/rhd-registers>
- 19
- 20
- 21

## 22 **FIGURE TITLES/LEGENDS**

23  
24 **Figure 1.** Geographical location of implementation sites in two districts within Uganda  
25 The four selected health centres (H) in Lira and Gulu (color coded above), were chosen according to  
26 RHD registrants' geographical density.  
27

28  
29 **Figure 2.** Sequential outline of ADD-RHD implementation plans for health centres in Lira and Gulu  
30 districts, Uganda  
31  
32  
33  
34  
35  
36  
37  
38  
39  
40  
41  
42  
43  
44  
45  
46  
47  
48  
49  
50  
51  
52  
53  
54  
55  
56  
57  
58  
59  
60



Figure 1. Geographical location of implementation sites in two districts within Uganda. The four selected health centres in Lira and Gulu are chosen according to RHD registrants' geographical density and are designated by H and colour coded.

162x91mm (300 x 300 DPI)

1  
2  
3  
4  
5  
6  
7  
8  
9  
10  
11  
12  
13  
14  
15  
16  
17  
18  
19  
20  
21  
22  
23  
24  
25  
26  
27  
28  
29  
30  
31  
32  
33  
34  
35  
36  
37  
38  
39  
40  
41  
42  
43  
44  
45  
46  
47  
48  
49  
50  
51  
52  
53  
54  
55  
56  
57  
58  
59  
60



Figure 2. Sequential outline of ADD-RHD implementation plans for health centres in Lira and Gulu districts, Uganda.

201x99mm (300 x 300 DPI)



## Standards for Reporting Implementation Studies: the StaRI checklist for completion

The StaRI standard should be referenced as: Pinnock H, Barwick M, Carpenter C, Eldridge S, Grandes G, Griffiths CJ, Rycroft-Malone J, Meissner P, Murray E, Patel A, Sheikh A, Taylor SJC for the StaRI Group. Standards for Reporting Implementation Studies ([StaRI statement](#)). *BMJ* 2017;356:i6795

The detailed Explanation and Elaboration document, which provides the rationale and exemplar text for all these items is: Pinnock H, Barwick M, Carpenter C, Eldridge S, Grandes G, Griffiths C, Rycroft-Malone J, Meissner P, Murray E, Patel A, Sheikh A, Taylor S, for the StaRI group. Standards for Reporting Implementation Studies ([StaRI Explanation and Elaboration document](#)). *BMJ Open* 2017 2017;7:e013318

Notes: A key concept of the StaRI standards is the dual strands of describing, on the one hand, the implementation strategy and, on the other, the clinical, healthcare, or public health intervention that is being implemented. These strands are represented as two columns in the checklist.

The primary focus of implementation science is the implementation strategy (column 1) and the expectation is that this will always be completed.

The evidence about the impact of the intervention on the targeted population should always be considered (column 2) and either health outcomes reported or robust evidence cited to support a known beneficial effect of the intervention on the health of individuals or populations.

The StaRI standards refers to the broad range of study designs employed in implementation science. Authors should refer to other reporting standards for advice on reporting specific methodological features. Conversely, whilst all items are worthy of consideration, not all items will be applicable to, or feasible within every study.

| Checklist item            | Reported on page # | Implementation Strategy                                                  | Reported on page # | Intervention                                                                                                                                                                                                                |
|---------------------------|--------------------|--------------------------------------------------------------------------|--------------------|-----------------------------------------------------------------------------------------------------------------------------------------------------------------------------------------------------------------------------|
|                           |                    | “Implementation strategy” refers to how the intervention was implemented |                    | “Intervention” refers to the healthcare or public health intervention that is being implemented.                                                                                                                            |
| <b>Title and abstract</b> |                    |                                                                          |                    |                                                                                                                                                                                                                             |
| Title                     | 1                  | 1                                                                        |                    | Identification as an implementation study, and description of the methodology in the title and/or keywords                                                                                                                  |
| Abstract                  | 2                  | 1                                                                        |                    | Identification as an implementation study, including a description of the implementation strategy to be tested, the evidence-based intervention being implemented, and defining the key implementation and health outcomes. |
| <b>Introduction</b>       |                    |                                                                          |                    |                                                                                                                                                                                                                             |
| Introduction              | 3                  | 2                                                                        |                    | Description of the problem, challenge or deficiency in healthcare or public health that the intervention being implemented aims to address.                                                                                 |
| Rationale                 | 4                  | 3                                                                        | 3, 5               | The scientific background and rationale for the intervention being implemented (including evidence about its effectiveness and how it is expected to achieve its effects).                                                  |

|                             |    |       |                                                                                                                                                                                                  |      |                                                                                                                                                       |
|-----------------------------|----|-------|--------------------------------------------------------------------------------------------------------------------------------------------------------------------------------------------------|------|-------------------------------------------------------------------------------------------------------------------------------------------------------|
| Aims and objectives         | 5  | 3     | The aims of the study, differentiating between implementation objectives and any intervention objectives.                                                                                        |      |                                                                                                                                                       |
| <b>Methods: description</b> |    |       |                                                                                                                                                                                                  |      |                                                                                                                                                       |
| Design                      | 6  | 3     | The design and key features of the evaluation, (cross referencing to any appropriate methodology reporting standards) and any changes to study protocol, with reasons                            |      |                                                                                                                                                       |
| Context                     | 7  | 4, 5  | The context in which the intervention was implemented. (Consider social, economic, policy, healthcare, organisational barriers and facilitators that might influence implementation elsewhere).  |      |                                                                                                                                                       |
| Targeted 'sites'            | 8  | 4, 6  | The characteristics of the targeted 'site(s)' (e.g. locations/personnel/resources etc.) for implementation and any eligibility criteria.                                                         | 8    | The population targeted by the intervention and any eligibility criteria.                                                                             |
| Description                 | 9  | 6 - 8 | A description of the implementation strategy                                                                                                                                                     | 5    | A description of the intervention                                                                                                                     |
| Sub-groups                  | 10 | NA    | Any sub-groups recruited for additional research tasks, and/or nested studies are described                                                                                                      |      |                                                                                                                                                       |
| <b>Methods: evaluation</b>  |    |       |                                                                                                                                                                                                  |      |                                                                                                                                                       |
| Outcomes                    | 11 | 9-11  | Defined pre-specified primary and other outcome(s) of the implementation strategy, and how they were assessed. Document any pre-determined targets                                               | 9-11 | Defined pre-specified primary and other outcome(s) of the intervention (if assessed), and how they were assessed. Document any pre-determined targets |
| Process evaluation          | 12 | 10    | Process evaluation objectives and outcomes related to the mechanism by which the strategy is expected to work                                                                                    |      |                                                                                                                                                       |
| Economic evaluation         | 13 | *     | Methods for resource use, costs, economic outcomes and analysis for the implementation strategy                                                                                                  | *    | Methods for resource use, costs, economic outcomes and analysis for the intervention                                                                  |
| Sample size                 | 14 | 11    | Rationale for sample sizes (including sample size calculations, budgetary constraints, practical considerations, data saturation, as appropriate)                                                |      |                                                                                                                                                       |
| Analysis                    | 15 | 11    | Methods of analysis (with reasons for that choice)                                                                                                                                               |      |                                                                                                                                                       |
| Sub-group analyses          | 16 | 10    | Any a priori sub-group analyses (e.g. between different sites in a multicentre study, different clinical or demographic populations), and sub-groups recruited to specific nested research tasks |      |                                                                                                                                                       |

| <b>Results</b>        |    |         |                                                                                                                                                                                                                                           |     |                                                                                                                         |
|-----------------------|----|---------|-------------------------------------------------------------------------------------------------------------------------------------------------------------------------------------------------------------------------------------------|-----|-------------------------------------------------------------------------------------------------------------------------|
| Characteristics       | 17 | N/A     | Proportion recruited and characteristics of the recipient population for the implementation strategy                                                                                                                                      | N/A | Proportion recruited and characteristics (if appropriate) of the recipient population for the intervention              |
| Outcomes              | 18 | N/A     | Primary and other outcome(s) of the implementation strategy                                                                                                                                                                               | N/A | Primary and other outcome(s) of the Intervention (if assessed)                                                          |
| Process outcomes      | 19 | N/A     | Process data related to the implementation strategy mapped to the mechanism by which the strategy is expected to work                                                                                                                     |     |                                                                                                                         |
| Economic evaluation   | 20 | N/A     | Resource use, costs, economic outcomes and analysis for the implementation strategy                                                                                                                                                       | N/A | Resource use, costs, economic outcomes and analysis for the intervention                                                |
| Sub-group analyses    | 21 | N/A     | Representativeness and outcomes of subgroups including those recruited to specific research tasks                                                                                                                                         |     |                                                                                                                         |
| Fidelity/adaptation   | 22 | N/A     | Fidelity to implementation strategy as planned and adaptation to suit context and preferences                                                                                                                                             | N/A | Fidelity to delivering the core components of intervention (where measured)                                             |
| Contextual changes    | 23 | N/A     | Contextual changes (if any) which may have affected outcomes                                                                                                                                                                              |     |                                                                                                                         |
| Harms                 | 24 | N/A     | All important harms or unintended effects in each group                                                                                                                                                                                   |     |                                                                                                                         |
| <b>Discussion</b>     |    |         |                                                                                                                                                                                                                                           |     |                                                                                                                         |
| Structured discussion | 25 | 12      | Summary of findings, strengths and limitations, comparisons with other studies, conclusions and implications                                                                                                                              |     |                                                                                                                         |
| Implications          | 26 | 12      | Discussion of policy, practice and/or research implications of the implementation strategy (specifically including scalability)                                                                                                           | 12  | Discussion of policy, practice and/or research implications of the intervention (specifically including sustainability) |
| <b>General</b>        |    |         |                                                                                                                                                                                                                                           |     |                                                                                                                         |
| Statements            | 27 | 13 - 14 | Include statement(s) on regulatory approvals (including, as appropriate, ethical approval, confidential use of routine data, governance approval), trial/study registration (availability of protocol), funding and conflicts of interest |     |                                                                                                                         |
